# Supplementary material for: Relationship between Solitary Masturbation and Sexual Satisfaction: A Systematic Review
Source: MDPI journal article supplement (doi:10.3390/healthcare12020235), 2024-01-17
Supplement: s1 [file s1]

# Supplementary Data S1.

| N. | Title                                                                                                                                                                                          | Authors                                                                                          | Year |
|----|------------------------------------------------------------------------------------------------------------------------------------------------------------------------------------------------|--------------------------------------------------------------------------------------------------|------|
| 1  | Masturbation Among Malaysian Young Adults: Associated Sexual and Psychological Well-Being Outcomes                                                                                             | Phuah L.A.; Teng J.H.J.; Goh P.H.                                                                | 2023 |
| 2  | Online Pornography Use and Sexual Satisfaction in Association With Relationship Satisfaction Among Middle-Aged and Older People                                                                | Sevciková, A; Gocieková, V; Stasek, A; Gottfried, J; Daneback, K                                 | 2023 |
| 3  | Masturbation Among Malaysian Young Adults: Associated Sexual and Psychological Well-Being Outcomes                                                                                             | Phuah, L; Teng, JHJ; Goh, PH                                                                     | 2023 |
| 4  | The Role of Mutual Masturbation within Relationships: Associations with Sexual Satisfaction and Sexual Self-Esteem                                                                             | Kiliç, D; Armstrong, HL; Graham, CA                                                              | 2023 |
| 5  | Singles Not Sexually Satisfied? Prevalence and Predictors of Sexual Satisfaction in Single versus Partnered Adults                                                                             | Fischer, N                                                                                       | 2023 |
| 6  | Sexual Risk Behavior and Satisfaction Among Men Who Have Sex With Men Living With Detectable HIV Viral Loads: A Nationwide Online Survey in China                                              | Fu, LW; Wang, BY; Tian, T; Zhou, XY; Lu, Z; Sun, YH; Zheng, WR; Gao, YX; Lin, YF; Li, H; Zou, HC | 2023 |
| 7  | The sex life of male patients with cirrhosis and its organic factors: What we have got so far?                                                                                                 | Darmadi, D; Pakpahan, C; Ruslie, RH; Amanda, B; Ibrahim, R                                       | 2023 |
| 8  | Sexual Function, Behavior, and Satisfaction in Masters Athletes                                                                                                                                | Wang, TY; Heath, MA; Tanaka, SK; Tanaka, H                                                       | 2023 |
| 9  | The Longer it is, the Closer One Feels: Perception of Emotional Closeness to the Partner, Relationship Duration, Sexual Activity, and Satisfaction in Married and Cohabiting Persons in Norway | Træen, B; Kvaalem, IL                                                                            | 2023 |
| 10 | Not Who You Are, But Who You Are With: Re-examining Women's Less Satisfying Sexual Debuts                                                                                                      | Peragine, DE; Kim, JJ; Maxwell, JA; Skorska, MN; Impett, EA; Cunningham, WA; Vanderlaan, DP      | 2023 |
| 11 | Factors influencing satisfaction with male circumcision in Taiwan                                                                                                                              | Chen, CH; Cheng, WM; Fan, YH; Chang, TP                                                          | 2023 |
| 12 | Changes in sexuality and couple relationship during the COVID-19 lockdown in Portugal: findings from an online survey                                                                          | Vieira, AS; Santos, HC; Pereira, J; Madeira, L                                                   | 2023 |

|    |                                                                                                                                                                                                |                                                                                                                                                                                                                                                                                                     |      |
|----|------------------------------------------------------------------------------------------------------------------------------------------------------------------------------------------------|-----------------------------------------------------------------------------------------------------------------------------------------------------------------------------------------------------------------------------------------------------------------------------------------------------|------|
| 13 | Patterns of Genital and Subjective Sexual Arousal in Cisgender Asexual Men                                                                                                                     | Skorska, MN; Yule, MA; Bogaert, AF; Brotto, LA                                                                                                                                                                                                                                                      | 2023 |
| 14 | Characteristics of men who report symptoms of delayed ejaculation: providing support for empirically derived diagnostic criteria                                                               | Rowland, DL; Attinger, DR; Morrow, AL; Motofei, I; Hevesi, K                                                                                                                                                                                                                                        | 2023 |
| 15 | The Role of Mutual Masturbation within Relationships: Associations with Sexual Satisfaction and Sexual Self-Esteem                                                                             | Kılıç, Dilan;Armstrong, Heather L;Graham, Cynthia A                                                                                                                                                                                                                                                 | 2023 |
| 16 | The role of mutual masturbation within relationships: Associations with sexual satisfaction and sexual self-esteem                                                                             | Kılıç, Dilan;Armstrong, Heather L.;Graham, Cynthia A.                                                                                                                                                                                                                                               | 2023 |
| 17 | Not who you are, but who you are with: Re-examining women's less satisfying sexual debuts                                                                                                      | Peragine, Diana E.;Kim, James J.;Maxwell, Jessica A.;Skorska, Malvina N.;Impett, Emily A.;Cunningham, William A.;VanderLaan, Doug P.                                                                                                                                                                | 2023 |
| 18 | Changes in sexuality and couple relationship during the covid-19 lockdown in portugal: Findings from an online survey                                                                          | Vieira, Ana Sofia;Castro Santos, Henrique;Pereira, Joana;Madeira, Luís                                                                                                                                                                                                                              | 2023 |
| 19 | The Longer it is, the Closer One Feels: Perception of Emotional Closeness to the Partner, Relationship Duration, Sexual Activity, and Satisfaction in Married and Cohabiting Persons in Norway | Træen, Bente;Kvalem, Ingela Lundin                                                                                                                                                                                                                                                                  | 2023 |
| 20 | Masturbation Among Malaysian Young Adults: Associated Sexual and Psychological Well-Being Outcomes.                                                                                            | Phuah, Li Ann;Teng, Jaclyn Hui Jie;Goh, Pei Hwa                                                                                                                                                                                                                                                     | 2023 |
| 21 | Characteristics of men who report symptoms of delayed ejaculation: Providing support for empirically derived diagnostic criteria                                                               | Rowland, David L.;Attinger, Drew R.;Morrow, Abigail L.;Motofei, Ion;Hevesi, Krisztina                                                                                                                                                                                                               | 2023 |
| 22 | Changes in sexual activities, function, and satisfaction during the COVID-19 pandemic era: a systematic review and meta-analysis.                                                              | Qaderi, Kowsar;Yazdkhasti, Mansoureh;Zangeneh, Sanaz;Behbahani, Bahar Morshed;Kalhor, Mehri;Shamsabadi, Ahmadsreza;Jesmani, Younes;Norouzi, Solmaz;Kajbafvala, Mehrnaz;Khodavirdilou, Rasa;Rahmani, Nahid;Namadian, Masoumeh;Ezabadi, Sajjad Ghane;Alkatout, Ibrahim;Mehraeen, Esmaeel;Rasoal, Dara | 2023 |

|    |                                                                                                                                                   |                                                                                                              |      |
|----|---------------------------------------------------------------------------------------------------------------------------------------------------|--------------------------------------------------------------------------------------------------------------|------|
| 23 | Characteristics of men who report symptoms of delayed ejaculation: providing support for empirically derived diagnostic criteria.                 | Rowland, David L;Attinger, Drew R;Morrow, Abigail L;Motofei, Ion;Hevesi, Krisztina                           | 2023 |
| 24 | The sex life of male patients with cirrhosis and its organic factors: What we have got so far?                                                    | Darmadi, Darmadi;Pakpahan, Cennikon;Riska Habriel Ruslie;Bella, Amanda;Ibrahim, Raditya                      | 2023 |
| 25 | Patterns of Genital and Subjective Sexual Arousal in Cisgender Asexual Men                                                                        | Skorska, Malvina N;Yule, Morag A;Bogaert, Anthony F;Brotto, Lori A                                           | 2023 |
| 26 | Patterns of Genital and Subjective Sexual Arousal in Cisgender Asexual Men.                                                                       | Skorska, Malvina N;Yule, Morag A;Bogaert, Anthony F;Brotto, Lori A                                           | 2023 |
| 27 | Sexual Function, Behavior, and Satisfaction in Masters Athletes                                                                                   | Wang, Tianyu;Heath, Melanie A;Tanaka, Sebastian K;Tanaka, Hirofumi                                           | 2023 |
| 28 | The sex life of male patients with cirrhosis and its organic factors: What we have got so far?                                                    | Darmadi, Darmadi;Pakpahan, Cennikon;Ruslie, Riska Habriel;Amanda, Bella;Ibrahim, Raditya                     | 2023 |
| 29 | Do pornography use and masturbation play a role in erectile dysfunction and relationship satisfaction in men?                                     | Rowland D.L.; Castleman J.M.; Bacys K.R.; Csonka B.; Hevesi K.                                               | 2023 |
| 30 | Sexual Risk Behavior and Satisfaction Among Men Who Have Sex With Men Living With Detectable HIV Viral Loads: A Nationwide Online Survey in China | Fu L.; Wang B.; Tian T.; Zhou X.; Lu Z.; Sun Y.; Zheng W.; Gao Y.; Lin Y.-F.; Li H.; Zou H.; Van Der Veen S. | 2023 |
| 31 | Let's Talk about Sex... and ADHD: Findings from an Anonymous Online Survey                                                                        | Young S.; Klassen L.J.; Reitmeier S.D.; Matheson J.D.; Gudjonsson G.H.                                       | 2023 |
| 32 | The sex life of male patients with cirrhosis and its organic factors: What we have got so far?                                                    | Darmadi D.; Pakpahan C.; Ruslie R.H.; Amanda B.; Ibrahim R.                                                  | 2023 |
| 33 | The influence of cannabis on sexual functioning and satisfaction                                                                                  | Moser A.; Ballard S.M.; Jensen J.; Averett P.                                                                | 2023 |
| 34 | A case-control study on depression, anxiety, and belief in sexual myths in trans women                                                            | Uyar B.; Yucel I.; Uyar E.; Ateş Budak E.; Kelle I.; Bulbuloglu S.                                           | 2023 |
| 35 | The Role of Mutual Masturbation within Relationships: Associations with Sexual Satisfaction and Sexual Self-Esteem                                | Kılıç D.; Armstrong H.L.; Graham C.A.                                                                        | 2023 |

|    |                                                                                                                                                                            |                                                                                                                                   |      |
|----|----------------------------------------------------------------------------------------------------------------------------------------------------------------------------|-----------------------------------------------------------------------------------------------------------------------------------|------|
| 36 | Sexual activity and function of adult men with spina bifida                                                                                                                | Szymanski K.M.; Roth J.D.; Hensel D.J.; Wiener J.S.; Younsi N.; Stein R.; Whittam B.; Kaefer M.; Rink R.C.; Cain M.P.; Misseri R. | 2023 |
| 37 | Not Who You Are, But Who You Are With: Re-examining Women's Less Satisfying Sexual Debuts                                                                                  | Peragine D.E.; Kim J.J.; Maxwell J.A.; Skorska M.N.; Impett E.A.; Cunningham W.A.; VanderLaan D.P.                                | 2023 |
| 38 | Mediators of Change in Cognitive-Behavioral Couple Therapy for Genito-Pelvic Pain: Results of a Randomized Clinical Trial                                                  | Santerre-Baillargeon M.; Rosen N.O.; Vaillancourt-Morel M.-P.; Corsini-Munt S.; Steben M.; Mayrand M.-H.; Bergeron S.             | 2023 |
| 39 | Sexual Function, Behavior, and Satisfaction in Masters Athletes                                                                                                            | Wang T.; Heath M.A.; Tanaka S.K.; Tanaka H.                                                                                       | 2023 |
| 40 | Characteristics of men who report symptoms of delayed ejaculation: providing support for empirically derived diagnostic criteria                                           | Rowland D.L.; Attinger D.R.; Morrow A.L.; Motofei I.; Hevesi K.                                                                   | 2023 |
| 41 | Changes in sexuality and couple relationship during the COVID-19 lockdown in Portugal: findings from an online survey                                                      | Vieira A.S.; Castro Santos H.; Pereira J.; Madeira L.                                                                             | 2023 |
| 42 | Sexuality and fertility desire in a large cohort of individuals with 46, XY differences in sex development                                                                 | Batista R.L.; Inácio M.; Brito V.N.; Sircili M.H.P.; Bag M.J.; Gomes N.L.; Costa E.M.F.; Domenice S.; Mendonca B.B.               | 2023 |
| 43 | Patterns of Genital and Subjective Sexual Arousal in Cisgender Asexual Men                                                                                                 | Skorska M.N.; Yule M.A.; Bogaert A.F.; Brotto L.A.                                                                                | 2023 |
| 44 | Sexual satisfaction and sexual behaviors during the COVID-19 pandemic: results from the International Sexual Health And REproductive (I-SHARE) health survey in Luxembourg | Fischer, VJ; Bravo, RG; Brunnet, AE; Michielsen, K; Tucker, JD; Campbell, L; Vögele, C                                            | 2022 |
| 45 | A Seemingly Paradoxical Relationship Between Masturbation Frequency and Sexual Satisfaction                                                                                | Fischer, N; Træen, B                                                                                                              | 2022 |
| 46 | Prevalence of Masturbation and Associated Factors Among Older Adults in Four European Countries                                                                            | Fischer, N; Graham, CA; Træen, B; Hald, GM                                                                                        | 2022 |
| 47 | BDSM: Does it Hurt or Help Sexual Satisfaction, Relationship Satisfaction, and Relationship Closeness?                                                                     | Strizzi, JM; Overup, CS; Cipric, A; Hald, GM; Træen, B                                                                            | 2022 |
| 48 | Relationships of Frequency, Secrecy, and Attitude Toward Pornography Use with the Sexual Satisfaction of Couples                                                           | del Re, UB; Hilpert, P; Bodenmann, G                                                                                              | 2022 |

|    |                                                                                                                                                                 |                                                                                                                   |      |
|----|-----------------------------------------------------------------------------------------------------------------------------------------------------------------|-------------------------------------------------------------------------------------------------------------------|------|
| 49 | The Influence of Types of Stimulation and Attitudes to Clitoral Self-stimulation on Female Sexual and Orgasm Satisfaction: a Cross-sectional Study              | Hoy, M; van Stein, K; Strauss, B; Brenk-Franz, K                                                                  | 2022 |
| 50 | First Adolescent Romantic and Sexual Experiences in Individuals With Differences of Sex Development/Intersex Conditions                                         | de Brouwer, IJ; Suijkerbuijk, M; van de Grift, TC; Kreukels, BPC                                                  | 2022 |
| 51 | Changes in the Sexual Behavior of Partners in Each Trimester of Pregnancy in Otwork in Polish Couples                                                           | Kulhawik, R; Zborowska, K; Grabarek, BO; Boron, D; Skrzypulec-Plinta, V; Drosdzol-Cop, A                          | 2022 |
| 52 | Sexual and Reproductive Health during the COVID-19 Pandemic: Results from a Cross-Sectional Online Survey in Germany                                            | Raeuchle, J; Briken, P; Schroeder, J; Ivanova, O                                                                  | 2022 |
| 53 | Premature Ejaculation Measures During Partnered Sex and Masturbation: What These Findings Tell Us About the Nature and Rigidity of Premature Ejaculation        | Rowland, DL; Teague, LG; Hevesi, K                                                                                | 2022 |
| 54 | Do Pornography Use and Masturbation Frequency Play a Role in Delayed/Inhibited Ejaculation during Partnered Sex? A Comprehensive and Detailed Analysis          | Rowland, DL; Morrow, AL; Hamilton, BD; Hevesi, K                                                                  | 2022 |
| 55 | Satisfaction with Singlehood and Sexual Activity                                                                                                                | Træen, B; Kvalem, IL                                                                                              | 2022 |
| 56 | Masturbation Frequency and Sexual Function in Individuals with and without Sexual Partners                                                                      | Huang, SJ; Niu, CY; Santtila, P                                                                                   | 2022 |
| 57 | Virtual Reality Versus Flatscreen Pornography: Correlations and Effects on Relationship Satisfaction, Rape-Myth Acceptance, and Problematic Use                 | Mitchell, KM; Ratan, R; Maas, MK; Holt, K; Slaker, JS; Gambino, A                                                 | 2022 |
| 58 | Masturbatory Behavior and Body Image: A Study Among Brazilian Women                                                                                             | de Lima, TEO; Dissenha, RP; Skare, TL; Leinig, CAS                                                                | 2022 |
| 59 | Focusing the Conceptualization of Erotophilia and Erotophobia on Global Attitudes Toward Sex: Development and Validation of the Sex Positivity-Negativity Scale | Hangen, F; Rogge, RD                                                                                              | 2022 |
| 60 | Impacts of COVID-19 on sexual behaviour in Britain: findings from a large, quasi-representative survey (Natsal-COVID)                                           | Mercer, CH; Clifton, S; Riddell, J; Tanton, C; Freeman, L; Copas, AJ; Dema, E; Pérez, RB; Gibbs, J; Macdowall, W; | 2022 |

|    |                                                                                                                                                    |                                                                                                                                                                                                                                                        |      |
|----|----------------------------------------------------------------------------------------------------------------------------------------------------|--------------------------------------------------------------------------------------------------------------------------------------------------------------------------------------------------------------------------------------------------------|------|
|    |                                                                                                                                                    | Menezes, D; Ridge, MC; Bonell, C; Sonnenberg, P; Field, N; Mitchell, KR                                                                                                                                                                                |      |
| 61 | First adolescent romantic and sexual experiences in individuals with differences of sex development/intersex conditions                            | de Brouwer, Iris J.;Suijkerbuijk, Merel;van de Grift, Tim C.;Kreukels, Baudewijntje P. C.                                                                                                                                                              | 2022 |
| 62 | First Adolescent Romantic and Sexual Experiences in Individuals With Differences of Sex Development/Intersex Conditions.                           | de Brouwer, Iris J.;Suijkerbuijk, Merel;van de Grift, Tim C.;Kreukels, Baudewijntje P C                                                                                                                                                                | 2022 |
| 63 | Sexual function, behavior, and satisfaction in masters athletes                                                                                    | Wang, Tianyu;Heath, Melanie A.;Tanaka, Sebastian K.;Tanaka, Hirofumi                                                                                                                                                                                   | 2022 |
| 64 | Impacts of COVID-19 on sexual behaviour in Britain: findings from a large, quasi-representative survey (Natsal-COVID)                              | Mercer, Catherine H;Soazig Clifton;Riddell, Julie;Tanton, Clare;Freeman, Lily;Copas, Andrew J;Dema, Emily;Pérez, Raquel Bosó;Gibbs, Jo;Macdowall, Wendy;Menezes, Dee;Ridge, Mary-Clare;Bonell, Chris;Sonnenberg, Pam;Field, Nigel;Mitchell, Kirstin R  | 2022 |
| 65 | Impacts of COVID-19 on sexual behaviour in Britain: findings from a large, quasi-representative survey (Natsal-COVID).                             | Mercer, Catherine H;Clifton, Soazig;Riddell, Julie;Tanton, Clare;Freeman, Lily;Copas, Andrew J;Dema, Emily;Bosó Pérez, Raquel;Gibbs, Jo;Macdowall, Wendy;Menezes, Dee;Ridge, Mary-Clare;Bonell, Chris;Sonnenberg, Pam;Field, Nigel;Mitchell, Kirstin R | 2022 |
| 66 | Satisfaction with singlehood and sexual activity                                                                                                   | Træen, Bente;Kvalem, Ingela Lundin                                                                                                                                                                                                                     | 2022 |
| 67 | 2022-RA-570-ESGO Gynecological cancer treatment and couple's sexuality                                                                             | Nowosielski, Krzysztof;Wróbel, Beata;Pałka, Aleksandra;Dąbrowski, Filip                                                                                                                                                                                | 2022 |
| 68 | Satisfaction with Singlehood and Sexual Activity                                                                                                   | Træen, Bente;Kvalem, Ingela Lundin                                                                                                                                                                                                                     | 2022 |
| 69 | The Influence of Types of Stimulation and Attitudes to Clitoral Self-stimulation on Female Sexual and Orgasm Satisfaction: a Cross-sectional Study | Hoy, Madita;van Stein, Katharina;Strauss, Bernhard;Brenk-Franz, Katja                                                                                                                                                                                  | 2022 |
| 70 | A Seemingly Paradoxical Relationship Between Masturbation Frequency and Sexual Satisfaction                                                        | Fischer, Nantje;Træen, Bente                                                                                                                                                                                                                           | 2022 |

|    |                                                                                                                                                                             |                                                                                                                                                                     |      |
|----|-----------------------------------------------------------------------------------------------------------------------------------------------------------------------------|---------------------------------------------------------------------------------------------------------------------------------------------------------------------|------|
| 71 | A Seemingly Paradoxical Relationship Between Masturbation Frequency and Sexual Satisfaction.                                                                                | Fischer, Nantje;Træen, Bente                                                                                                                                        | 2022 |
| 72 | A seemingly paradoxical relationship between masturbation frequency and sexual satisfaction                                                                                 | Fischer, Nantje;Træen, Bente                                                                                                                                        | 2022 |
| 73 | Sexual satisfaction and sexual behaviors during the COVID-19 pandemic: results from the International Sexual Health And REproductive (I-SHARE) health survey in Luxembourg. | Fischer, Vinicius Jobim;Bravo, Raquel Gómez;Brunnet, Alice Einloft;Michielsen, Kristien;Tucker, Joseph D;Campbell, Linda;Vögele, Claus                              | 2022 |
| 74 | The impact of the COVID-19 pandemic on sexual health in CIS women living in Germany                                                                                         | Batz, Falk;Lermer, Eva;Hatzler, Laura;Vilsmaier, Theresa;Schröder, Lennard;Chelariu-Raicu, Anca;Behr, Joachim;Mahner, Sven;Buspavanich, Pichit;Thaler, Christian J. | 2022 |
| 75 | The Impact of the COVID-19 Pandemic on Sexual Health in Cis Women Living in Germany.                                                                                        | Batz, Falk;Lermer, Eva;Hatzler, Laura;Vilsmaier, Theresa;Schröder, Lennard;Chelariu-Raicu, Anca;Behr, Joachim;Mahner, Sven;Buspavanich, Pichit;Thaler, Christian J  | 2022 |
| 76 | Associations between tactile intimacy and sleep quality in healthy adults: A systematic review                                                                              | Dueren, Anna L.;Perach, Rotem;Banissy, Jasmine F. M.;Bowling, Natalie C.;Gregory, Alice M.;Banissy, Michael J.                                                      | 2022 |
| 77 | Associations between tactile intimacy and sleep quality in healthy adults: A systematic review.                                                                             | Dueren, Anna L;Perach, Rotem;Banissy, Jasmine F M;Bowling, Natalie C;Gregory, Alice M;Banissy, Michael J                                                            | 2022 |
| 78 | Patterns of genital and subjective sexual arousal in cisgender asexual men                                                                                                  | Skorska, Malvina N.;Yule, Morag A.;Bogaert, Anthony F.;Brotto, Lori A.                                                                                              | 2022 |
| 79 | Masturbatory behavior and body image: A study among Brazilian women                                                                                                         | de Lima, Taís Elena Oliveira;Dissenha, Rafaela Piccinelli;Skare, Thelma Larocca;Leinig, Cezar Augusto Soares                                                        | 2022 |
| 80 | Prevalence of Masturbation and Associated Factors Among Older Adults in Four European Countries                                                                             | Fischer Nantje;Graham, Cynthia A;Træen Bente;Hald, Gert Martin                                                                                                      | 2022 |
| 81 | Masturbatory Behavior and Body Image: A Study Among Brazilian Women                                                                                                         | de Lima Taís Elena Oliveira;Piccinelli, Dissenha Rafaela;Skare, Thelma Larocca;Leinig Cezar Augusto Soares                                                          | 2022 |

|    |                                                                                                                                                                            |                                                                                                                                           |      |
|----|----------------------------------------------------------------------------------------------------------------------------------------------------------------------------|-------------------------------------------------------------------------------------------------------------------------------------------|------|
| 82 | Prevalence of Masturbation and Associated Factors Among Older Adults in Four European Countries.                                                                           | Fischer, Nantje;Graham, Cynthia A;Træen, Bente;Hald, Gert Martin                                                                          | 2022 |
| 83 | Changes in the Sexual Behavior of Partners in Each Trimester of Pregnancy in Otwock in Polish Couples.                                                                     | Kulhawik, Robert;Zborowska, Katarzyna;Grabarek, Benjamin Oskar;Boroń, Dariusz;Skrzypulec-Plinta, Violetta;Drosdzol-Cop, Agnieszka         | 2022 |
| 84 | Sexual and Reproductive Health during the COVID-19 Pandemic: Results from a Cross-Sectional Online Survey in Germany.                                                      | Räuchle, Jule;Briken, Peer;Schröder, Johanna;Ivanova, Olena                                                                               | 2022 |
| 85 | <i>Reinventing Licentiousness: Pornography and Modern China</i> by Y. Yvon Wang (review)                                                                                   | Rocha, Leon Antonio                                                                                                                       | 2022 |
| 86 | Premature Ejaculation Measures During Partnered Sex and Masturbation: What These Findings Tell Us About the Nature and Rigidity of Premature Ejaculation                   | Rowland, David L;Teague, Lijana G;Hevesi, Krisztina                                                                                       | 2022 |
| 87 | Exploring the adult sexual wellbeing and behavior during the COVID-19 pandemic. A systematic review and meta-analysis.                                                     | Mourikis, Iraklis;Kokka, Ioulia;Koumantarou-Malisiova, Elli;Kontoangelos, Konstantinos;Konstantakopoulos, George;Papageorgiou, Charalabos | 2022 |
| 88 | Masturbation Frequency and Sexual Function in Individuals with and without Sexual Partners                                                                                 | Huang, Sijia;Niu, Caoyuan;Santtila, Pekka                                                                                                 | 2022 |
| 89 | Sexual satisfaction and sexual behaviors during the COVID-19 pandemic: results from the International Sexual Health And REproductive (I-SHARE) health survey in Luxembourg | Fischer, Vinicius Jobim;Raquel Gómez Bravo;Brunnet, Alice Einloft;Michielsen, Kristien;Tucker, Joseph D;Campbell, Linda;Vögele, Claus     | 2022 |
| 90 | Do Pornography Use and Masturbation Frequency Play a Role in Delayed/Inhibited Ejaculation during Partnered Sex? A Comprehensive and Detailed Analysis                     | Rowland, David L;Morrow, Abigail L;Hamilton, Benjamin D;Hevesi, Krisztina                                                                 | 2022 |
| 91 | Is Basson's model of sexual response relevant? A commentary                                                                                                                | Balon, Richard                                                                                                                            | 2022 |
| 92 | Changes in the Sexual Behavior of Partners in Each Trimester of Pregnancy in Otwock in Polish Couples                                                                      | Kulhawik, Robert;Zborowska, Katarzyna;Grabarek, Benjamin Oskar;Boroń, Dariusz;Skrzypulec-Plinta, Violetta;Drosdzol-Cop, Agnieszka         | 2022 |



|     |                                                                                                                                                                                                                |                                                                                                       |      |
|-----|----------------------------------------------------------------------------------------------------------------------------------------------------------------------------------------------------------------|-------------------------------------------------------------------------------------------------------|------|
| 93  | Premature ejaculation measures during partnered sex and masturbation: What these findings tell us about the nature and rigidity of premature ejaculation                                                       | Rowland, David L.;Teague, Lijana G.;Hevesi, Krisztina                                                 | 2022 |
| 94  | Premature Ejaculation Measures During Partnered Sex and Masturbation: What These Findings Tell Us About the Nature and Rigidity of Premature Ejaculation.                                                      | Rowland, David L;Teague, Lijana G;Hevesi, Krisztina                                                   | 2022 |
| 95  | Focusing the Conceptualization of Erotophilia and Erotophobia on Global Attitudes Toward Sex: Development and Validation of the Sex Positivity–Negativity Scale                                                | Hangen Forrest;Rogge, Ronald D                                                                        | 2022 |
| 96  | Sexual and Reproductive Health during the COVID-19 Pandemic: Results from a Cross-Sectional Online Survey in Germany                                                                                           | Räuchle, Jule;Briken, Peer;Schröder, Johanna;Ivanova, Olena                                           | 2022 |
| 97  | Focusing the Conceptualization of Erotophilia and Erotophobia on Global Attitudes Toward Sex: Development and Validation of the Sex Positivity-Negativity Scale.                                               | Hangen, Forrest;Rogge, Ronald D                                                                       | 2022 |
| 98  | Single and partnered individuals' sexual satisfaction as a function of sexual desire and activities: Results using a sexual satisfaction scale demonstrating measurement invariance across partnership status. | Park, Y.; MacDonald, G.                                                                               | 2022 |
| 99  | Sexual satisfaction and sexual behaviors during the COVID-19 pandemic: results from the International Sexual Health And REproductive (I-SHARE) health survey in Luxembourg                                     | Fischer V.J.; Bravo R.G.; Brunnet A.E.; Michielsen K.; Tucker J.D.; Campbell L.; Vögele C.            | 2022 |
| 100 | Changes in the Sexual Behavior of Partners in Each Trimester of Pregnancy in Otwock in Polish Couples                                                                                                          | Kulhawik R.; Zborowska K.; Grabarek B.O.; Boroń D.; Skrzypulec-Plinta V.; Drosdzol-Cop A.             | 2022 |
| 101 | First Adolescent Romantic and Sexual Experiences in Individuals With Differences of Sex Development/Intersex Conditions                                                                                        | de Brouwer I.J.; Suijkerbuijk M.; van de Grift T.C.; Kreukels B.P.C.                                  | 2022 |
| 102 | Use of dental drill handpiece to remove steel nut causing penile strangulation: a case report and review of the literature                                                                                     | Nguyen T.T.; Ngo X.T.; Chau Q.T.; Hoang K.C.; Dinh L.Q.V.; Ly H.T.; Hoang T.D.; Dobbs R.W.; Thai M.S. | 2022 |

|     |                                                                                                                                                                 |                                                                                                                                                                                                 |      |
|-----|-----------------------------------------------------------------------------------------------------------------------------------------------------------------|-------------------------------------------------------------------------------------------------------------------------------------------------------------------------------------------------|------|
| 103 | Focusing the Conceptualization of Erotophilia and Erotophobia on Global Attitudes Toward Sex: Development and Validation of the Sex Positivity–Negativity Scale | Hangen F.; Rogge R.D.                                                                                                                                                                           | 2022 |
| 104 | Prevalence of Masturbation and Associated Factors Among Older Adults in Four European Countries                                                                 | Fischer N.; Graham C.A.; Træen B.; Hald G.M.                                                                                                                                                    | 2022 |
| 105 | Are the Criteria for the Diagnosis of Premature Ejaculation Applicable to Gay Men or Sexual Activities Other than Penile-Vaginal Intercourse?                   | McNabney S.M.; Weseman C.E.; Hevesi K.; Rowland D.L.                                                                                                                                            | 2022 |
| 106 | The Impact of the COVID-19 Pandemic on Sexual Health in Cis Women Living in Germany                                                                             | Batz F.; Lerner E.; Hatzler L.; Vilsmaier T.; Schröder L.; Chelariu-Raicu A.; Behr J.; Mahner S.; Buspavanich P.; Thaler C.J.                                                                   | 2022 |
| 107 | Sexual and Reproductive Health during the COVID-19 Pandemic: Results from a Cross-Sectional Online Survey in Germany                                            | Räuchle J.; Briken P.; Schröder J.; Ivanova O.                                                                                                                                                  | 2022 |
| 108 | Satisfaction with Singlehood and Sexual Activity                                                                                                                | Træen B.; Kvaalem I.L.                                                                                                                                                                          | 2022 |
| 109 | Masturbatory Behavior and Body Image: A Study Among Brazilian Women                                                                                             | de Lima T.E.O.; Dissenha R.P.; Skare T.L.; Leinig C.A.S.                                                                                                                                        | 2022 |
| 110 | RUNX1 is a promising prognostic biomarker and related to immune infiltrates of cancer-associated fibroblasts in human cancers                                   | Tuo Z.; Zhang Y.; Wang X.; Dai S.; Liu K.; Xia D.; Wang J.; Bi L.                                                                                                                               | 2022 |
| 111 | Premature Ejaculation Measures During Partnered Sex and Masturbation: What These Findings Tell Us About the Nature and Rigidity of Premature Ejaculation        | Rowland D.L.; Teague L.G.; Hevesi K.                                                                                                                                                            | 2022 |
| 112 | Impacts of COVID-19 on sexual behaviour in Britain: findings from a large, quasi-representative survey (Natsal-COVID)                                           | Mercer C.H.; Clifton S.; Riddell J.; Tanton C.; Freeman L.; Copas A.J.; Dema E.; Pérez R.B.; Gibbs J.; Macdowall W.; Menezes D.; Ridge M.-C.; Bonell C.; Sonnenberg P.; Field N.; Mitchell K.R. | 2022 |
| 113 | Orgasm Rating Scale and Bodily Sensations of Orgasm Scale: Validation for Use With Pre, Peri, and Post-Menopausal Women                                         | Webb A.E.; Reissing E.D.; Huta V.                                                                                                                                                               | 2022 |

|     |                                                                                                                                                                                                |                                                                                                                                                     |      |
|-----|------------------------------------------------------------------------------------------------------------------------------------------------------------------------------------------------|-----------------------------------------------------------------------------------------------------------------------------------------------------|------|
| 114 | Changes in sexual functions and habits of healthcare workers during the ongoing COVID-19 outbreak: a cross-sectional survey study                                                              | Güzel A.; Döndü A.                                                                                                                                  | 2022 |
| 115 | Functional and Oncological Outcomes of Female Pelvic Organ-preserving Robot-assisted Radical Cystectomy                                                                                        | Lavallée E.; Dovey Z.; Pathak P.; Dey L.; Renström Koskela L.; Hosseini A.; Waingankar N.; Mehrazin R.; Sfakianos J.; Hosseini A.; Wiklund P.       | 2022 |
| 116 | Sexual dysfunction associated with chronic retention of foreign bodies in the low urinary tract                                                                                                | Zhang Z.; Zhu X.; Wang Y.; Chen D.; Fan J.; Deng C.; Liu G.; Yang L.; Feloney M.; Wang X.; Zhang Y.                                                 | 2022 |
| 117 | The Longer it is, the Closer One Feels: Perception of Emotional Closeness to the Partner, Relationship Duration, Sexual Activity, and Satisfaction in Married and Cohabiting Persons in Norway | Træen B.; Kvalem I.L.                                                                                                                               | 2022 |
| 118 | A Seemingly Paradoxical Relationship Between Masturbation Frequency and Sexual Satisfaction                                                                                                    | Fischer N.; Træen B.                                                                                                                                | 2022 |
| 119 | Male Reproductive Health-study of a sperm donor population                                                                                                                                     | Fonseca A.C.S.; Barreiro M.; Tomé A.; Vale-Fernandes E.                                                                                             | 2022 |
| 120 | Sexual health outcomes after penile reconstruction in the exstrophy–epispadias complex                                                                                                         | Harris T.G.W.; Khandge P.; Wu W.J.; Leto Barone A.A.; Manyevitch R.; Sholklapper T.; Bivalacqua T.J.; Burnett A.L.; Redett R.J., III; Gearhart J.P. | 2022 |
| 121 | The Big O: Sociocultural Influences on Orgasm Frequency and Sexual Satisfaction in Women                                                                                                       | Lentz, AM; Zaikman, Y                                                                                                                               | 2021 |
| 122 | Uncovering the Most Important Factors for Predicting Sexual Desire Using Explainable Machine Learning                                                                                          | Vowels, LM; Vowels, MJ; Mark, KP                                                                                                                    | 2021 |
| 123 | Impact of COVID-19 Pandemic on the Sexual Function of Health Professionals From an Epicenter in Brazil                                                                                         | Neto, RP; Nascimento, BCG; Silva, GCD; Barbosa, JABA; de Bessa, J; Teixeira, TA; Srougi, M; Nahas, WC; Hallak, J; Cury, J                           | 2021 |
| 124 | Pornography Use and Sexual Health among Same-Sex and Mixed-Sex Couples: An Event-Level Dyadic Analysis                                                                                         | Vaillancourt-Morel, MP; Rosen, NO; Stulhofer, A; Bosisio, M; Bergeron, S                                                                            | 2021 |
| 125 | Hormonal Contraception and Sexuality: Causal Effects, Unobserved Selection, or Reverse Causality?                                                                                              | Botzet, LJ; Gerlach, TM; Driebe, JC; Penke, L; Arslan, RC                                                                                           | 2021 |

|     |                                                                                                                                                                                                    |                                                                                                       |      |
|-----|----------------------------------------------------------------------------------------------------------------------------------------------------------------------------------------------------|-------------------------------------------------------------------------------------------------------|------|
| 126 | Partnership status, living arrangements, and changes in sexual behaviour and satisfaction during the COVID-19 lockdown: insights from an observational, cross-sectional online survey in Singapore | Tan, RKJ; O'Hara, CA; Kumar, N                                                                        | 2021 |
| 127 | Pornography and Sexual Dissatisfaction: The Role of Pornographic Arousal, Upward Pornographic Comparisons, and Preference for Pornographic Masturbation                                            | Wright, PJ; Paul, B; Herbenick, D; Tokunaga, RS                                                       | 2021 |
| 128 | Misconceptions About Sexual Health in Older Women: Why We Need to Talk About It                                                                                                                    | Kuhle, CL; Zhang, X; Kapoor, E                                                                        | 2021 |
| 129 | Developing a prediction model for the self-evaluation of erectile dysfunction in an adult male population                                                                                          | Cai, ZL; Li, HJ                                                                                       | 2021 |
| 130 | Sexual and psychological health of couples with azoospermia in the context of the COVID-19 pandemic                                                                                                | Dong, M; Tao, YQ; Wu, SS; Li, ZT; Wang, XB; Tan, JC                                                   | 2021 |
| 131 | Sexual Quality of Life in Men <60 Years Old after Coronary Bypass Surgery                                                                                                                          | Ghazy, T; Haeberle, E; Kappert, U; Petzold, S; Plötze, K; Mashhour, A; Matschke, K; Ouda, A           | 2021 |
| 132 | Faking Orgasm: Relationship to Orgasmic Problems and Relationship Type in Heterosexual Women                                                                                                       | Hevesi, K; Horvath, Z; Sal, D; Miklos, E; Rowland, DL                                                 | 2021 |
| 133 | Penile ring entrapment and strangulation: A case report at Kampala International University Teaching Hospital in Western Uganda                                                                    | Kyomukama, LA; Ssebuufu, R; Wani, SA; Waziri, MA; Lule, H                                             | 2021 |
| 134 | The Impact of the COVID-19 Pandemic on Sexual Behaviors: Findings From a National Survey in the United States                                                                                      | Gleason, N; Banik, S; Braverman, J; Coleman, E                                                        | 2021 |
| 135 | How the COVID-19 Pandemic Affects Sexual Behavior of Hetero-, Homo-, and Bisexual Males in Germany                                                                                                 | Mumm, JN; Vilsmaier, T; Schuetz, JM; Rodler, S; Zehni, AZ; Bauer, RM; Staehler, M; Stief, CG; Batz, F | 2021 |
| 136 | Single and multiple orgasm experience among women in heterosexual partnerships. Results of the German Health and Sexuality Survey (GeSiD)                                                          | Cerwenka, Susanne; Dekker, Arne; Pietras, Laura; Briken, Peer                                         | 2021 |

|     |                                                                                                                                                                                                     |                                                                                                                                                                                                                               |      |
|-----|-----------------------------------------------------------------------------------------------------------------------------------------------------------------------------------------------------|-------------------------------------------------------------------------------------------------------------------------------------------------------------------------------------------------------------------------------|------|
| 137 | Single and Multiple Orgasm Experience Among Women in Heterosexual Partnerships. Results of the German Health and Sexuality Survey (GeSiD).                                                          | Cerwenka, Susanne;Dekker, Arne;Pietras, Laura;Briken, Peer                                                                                                                                                                    | 2021 |
| 138 | Prevalence of masturbation and associated factors among older adults in four european countries                                                                                                     | Fischer, Nantje;Graham, Cynthia A.;Træen, Bente;Hald, Gert Martin                                                                                                                                                             | 2021 |
| 139 | The impact of the COVID-19 pandemic on sexual behaviors: Findings from a national survey in the United States                                                                                       | Gleason, Neil;Banik, Swagata;Braverman, Jesse;Coleman, Eli                                                                                                                                                                    | 2021 |
| 140 | Partnership status, living arrangements, and changes in sexual behaviour and satisfaction during the COVID-19 lockdown: insights from an observational, cross-sectional online survey in Singapore. | Tan, Rayner Kay Jin;O'Hara, Caitlin Alsandria;Kumar, Navin                                                                                                                                                                    | 2021 |
| 141 | The Impact of the COVID-19 Pandemic on Sexual Behaviors: Findings From a National Survey in the United States.                                                                                      | Gleason, Neil;Banik, Swagata;Braverman, Jesse;Coleman, Eli                                                                                                                                                                    | 2021 |
| 142 | Hormonal contraception and sexuality: Causal effects, unobserved selection, or reverse causality?                                                                                                   | Botzet, Laura J.;Gerlach, Tanja M.;Driebe, Julie C.;Penke, Lars;Arslan, Ruben C.                                                                                                                                              | 2021 |
| 143 | Sexual and psychological health of couples with azoospermia in the context of the COVID-19 pandemic                                                                                                 | Meng Dong;Tao, Yanqiang;Wu, Shanshan;Li, Zhengtao;Wang, Xiaobin;Tan, Jichun                                                                                                                                                   | 2021 |
| 144 | Hormonal Contraception and Sexuality: Causal Effects, Unobserved Selection, or Reverse Causality?                                                                                                   | Botzet, Laura J;Gerlach, Tanja M;Driebe, Julie C;Penke Lars;Arslan, Ruben C                                                                                                                                                   | 2021 |
| 145 | Paris' medical residents' sexual health before the SARS-CoV-2 burden                                                                                                                                | Pierre-Emmanuel Cailleaux;Koenig, Manon                                                                                                                                                                                       | 2021 |
| 146 | Paris' medical residents' sexual health before the SARS-CoV-2 burden                                                                                                                                | Pierre-Emmanuel Cailleaux;Koenig, Manon                                                                                                                                                                                       | 2021 |
| 147 | Impact of COVID-19 Pandemic on the Sexual Function of Health Professionals From an Epicenter in Brazil.                                                                                             | Neto, Rubens Pedrenho;Nascimento, Bruno C G;Carvalho Dos Anjos Silva, Gabriel;Barbosa, João Arthur Brunhara Alves;Júnior, José de Bessa;Teixeira, Thiago Afonso;Srougi, Miguel;Nahas, William Carlos;Hallak, Jorge;Cury, José | 2021 |

|     |                                                                                                                                                                 |                                                                                                                                                           |      |
|-----|-----------------------------------------------------------------------------------------------------------------------------------------------------------------|-----------------------------------------------------------------------------------------------------------------------------------------------------------|------|
| 148 | Focusing the conceptualization of erotophilia and erotophobia on global attitudes toward sex: Development and validation of the sex positivity–negativity scale | Hangen, Forrest;Rogge, Ronald D.                                                                                                                          | 2021 |
| 149 | How the COVID-19 Pandemic Affects Sexual Behavior of Hetero-, Homo-, and Bisexual Males in Germany.                                                             | Mumm, Jan-Niclas;Vilsmaier, Theresa;Schuetz, Julius M;Rodler, Severin;Zati Zehni, Alaleh;Bauer, Ricarda M;Staehler, Michael;Stief, Christian G;Batz, Falk | 2021 |
| 150 | The influence of types of stimulation and attitudes to clitoral self-stimulation on female sexual and orgasm satisfaction: A cross-sectional study              | Hoy, Madita;van Stein, Katharina;Strauss, Bernhard;Brenk-Franz, Katja                                                                                     | 2021 |
| 151 | Uncovering the most important factors for predicting sexual desire using explainable machine learning                                                           | Vowels, Laura M.;Vowels, Matthew J.;Mark, Kristen P.                                                                                                      | 2021 |
| 152 | Uncovering the Most Important Factors for Predicting Sexual Desire Using Explainable Machine Learning.                                                          | Vowels, Laura M;Vowels, Matthew J;Mark, Kristen P                                                                                                         | 2021 |
| 153 | The big “O”: Sociocultural influences on orgasm frequency and sexual satisfaction in women                                                                      | Lentz, Anna Maree;Zaikman, Yuliana                                                                                                                        | 2021 |
| 154 | The Big “O”: Sociocultural Influences on Orgasm Frequency and Sexual Satisfaction in Women                                                                      | Lentz, Anna Maree;Zaikman Yuliana                                                                                                                         | 2021 |
| 155 | Sexual Quality of Life in Men <60 Years Old after Coronary Bypass Surgery.                                                                                      | Ghazy, Tamer;Haeberle, Erwin;Kappert, Utz;Petzold, Stephan;Plötze, Katrin;Mashhour, Ahmed;Matschke, Klaus;Ouda, Ahmed                                     | 2021 |
| 156 | Pornography and sexual dissatisfaction: The role of pornographic arousal, upward pornographic comparisons, and preference for pornographic masturbation         | Wright, Paul J.;Paul, Bryant;Herbenick, Debby;Tokunaga, Robert S.                                                                                         | 2021 |
| 157 | Changes in pornography use and sexual behaviour during lockdown                                                                                                 | Koós, M;Bóthe, B;Király, O;Paksi, B;Demetrovics, Z                                                                                                        | 2021 |
| 158 | Pornography Use and Sexual Health among Same-Sex and Mixed-Sex Couples: An Event-Level Dyadic Analysis                                                          | Vaillancourt-Morel Marie-Pier;Rosen, Natalie O;Štulhofer Aleksandar;Bosisio Myriam;Bergeron, Sophie                                                       | 2021 |

|     |                                                                                                                                                                                                    |                                                                                                         |      |
|-----|----------------------------------------------------------------------------------------------------------------------------------------------------------------------------------------------------|---------------------------------------------------------------------------------------------------------|------|
| 159 | Developing a prediction model for the self-evaluation of erectile dysfunction in an adult male population                                                                                          | Cai, Zhonglin;Li, Hongjun                                                                               | 2021 |
| 160 | Pornography use and sexual health among same-sex and mixed-sex couples: An event-level dyadic analysis                                                                                             | Vaillancourt-Morel, Marie-Pier;Rosen, Natalie O.;Štulhofer, Aleksandar;Bosisio, Myriam;Bergeron, Sophie | 2021 |
| 161 | Pornography Use and Sexual Health among Same-Sex and Mixed-Sex Couples: An Event-Level Dyadic Analysis.                                                                                            | Vaillancourt-Morel, Marie-Pier;Rosen, Natalie O.;Štulhofer, Aleksandar;Bosisio, Myriam;Bergeron, Sophie | 2021 |
| 162 | Developing a prediction model for the self-evaluation of erectile dysfunction in an adult male population.                                                                                         | Cai, Zhonglin;Li, Hongjun                                                                               | 2021 |
| 163 | Partnership status, living arrangements, and changes in sexual behaviour and satisfaction during the COVID-19 lockdown: insights from an observational, cross-sectional online survey in Singapore | Jin Tan, Rayner Kay;Caitlin Alsandria O'Hara;Kumar, Navin                                               | 2021 |
| 164 | Sexual and psychological health of couples with azoospermia in the context of the COVID-19 pandemic.                                                                                               | Dong, Meng;Tao, Yanqiang;Wu, Shanshan;Li, Zhengtao;Wang, Xiaobin;Tan, Jichun                            | 2021 |
| 165 | Single and Multiple Orgasm Experience Among Women in Heterosexual Partnerships. Results of the German Health and Sexuality Survey (GeSiD)                                                          | Cerwenka S.; Dekker A.; Pietras L.; Briken P.                                                           | 2021 |
| 166 | The impact of the coronavirus disease-19 pandemic on sexual behavior of marriage people in Indonesia                                                                                               | Tribowo J.A.; Tanojo T.D.; Supardi S.; Pakpahan C.; Siswidiyanto E.B.; Rezano A.; I'tishom R.           | 2021 |
| 167 | The Impact of the COVID-19 Pandemic on Sexual Behaviors: Findings From a National Survey in the United States                                                                                      | Gleason N.; Banik S.; Braverman J.; Coleman E.                                                          | 2021 |
| 168 | Sexual and psychological health of couples with azoospermia in the context of the COVID-19 pandemic                                                                                                | Dong M.; Tao Y.; Wu S.; Li Z.; Wang X.; Tan J.                                                          | 2021 |
| 169 | Redefining a sexual medicine paradigm: subclinical premature ejaculation as a new taxonomic entity                                                                                                 | Colonnello E.; Ciocca G.; Limoncin E.; Sansone A.; Jannini E.A.                                         | 2021 |
| 170 | The Big "O": Sociocultural Influences on Orgasm Frequency and Sexual Satisfaction in Women                                                                                                         | Lentz A.M.; Zaikman Y.                                                                                  | 2021 |
| 171 | Cybersex addiction in a gay man: a case report                                                                                                                                                     | Skryabin V.; Zastrozhin M.; Chumakov E.                                                                 | 2021 |

|     |                                                                                                                                                                                                                                                                          |                                                                                                                                                                                      |      |
|-----|--------------------------------------------------------------------------------------------------------------------------------------------------------------------------------------------------------------------------------------------------------------------------|--------------------------------------------------------------------------------------------------------------------------------------------------------------------------------------|------|
| 172 | Partnership status, living arrangements, and changes in sexual behaviour and satisfaction during the COVID-19 lockdown: Insights from an observational, cross-sectional online survey in Singapore                                                                       | Tan R.K.J.; O'Hara C.A.; Kumar N.                                                                                                                                                    | 2021 |
| 173 | The disruptive impact of the COVID-19 pandemic on sexual behavior of a German-speaking population; [L'impact de la pandémie de COVID-19 sur l'activité sexuelle et les pratiques sexuelles des célibataires et des personnes en couple dans une population germanophone] | Hille Z.; Oezdemir U.C.; Beier K.M.; Hatzler L.                                                                                                                                      | 2021 |
| 174 | The clinical significance of abnormal ejaculation by silodosin. Is it important?                                                                                                                                                                                         | Akgül M.; Yazıcı C.; Şipal T.; Arda E.                                                                                                                                               | 2021 |
| 175 | Interventions used by allied health professionals in sexual rehabilitation after stroke: A systematic review                                                                                                                                                             | Auger L.-P.; Grondin M.; Aubertin M.; Marois A.; Filiatrault J.; Rochette A.                                                                                                         | 2021 |
| 176 | The Influence of Types of Stimulation and Attitudes to Clitoral Self-stimulation on Female Sexual and Orgasm Satisfaction: a Cross-sectional Study                                                                                                                       | Hoy M.; van Stein K.; Strauss B.; Brenk-Franz K.                                                                                                                                     | 2021 |
| 177 | Pornography and Sexual Dissatisfaction: The Role of Pornographic Arousal, Upward Pornographic Comparisons, and Preference for Pornographic Masturbation                                                                                                                  | Wright P.J.; Paul B.; Herbenick D.; Tokunaga R.S.                                                                                                                                    | 2021 |
| 178 | Pornography Use and Sexual Health among Same-Sex and Mixed-Sex Couples: An Event-Level Dyadic Analysis                                                                                                                                                                   | Vaillancourt-Morel M.-P.; Rosen N.O.; Štulhofer A.; Bosisio M.; Bergeron S.                                                                                                          | 2021 |
| 179 | Exploring Relationships Between Genito-Pelvic Pain/Penetration Disorder, Sex Guilt, and Religiosity Among College Women in the U.S.                                                                                                                                      | Azim K.A.; Happel-Parkins A.; Moses A.; Haardoerfer R.                                                                                                                               | 2021 |
| 180 | The Impact of Social Distancing Measures Due to COVID-19 Pandemic on Sexual Function and Relationship Quality of Couples in Greece                                                                                                                                       | Sotiropoulou P.; Ferenidou F.; Owens D.; Kokka I.; Minopoulou E.; Koumantanou E.; Pavlopoulou I.; Apotsos P.; Karvouni M.; Koumantarou E.; Mourikis I.; Vaidakis N.; Papageorgiou C. | 2021 |



|     |                                                                                                                                           |                                                                                                                                                      |      |
|-----|-------------------------------------------------------------------------------------------------------------------------------------------|------------------------------------------------------------------------------------------------------------------------------------------------------|------|
| 181 | Sexual activity in adolescents and young adults through covid-19 pandemic                                                                 | Stavridou A.; Samiakou C.; Kourti A.; Tsiourou S.; Panagouli E.; Thirios A.; Psaltopoulou T.; Sergeantanis T.N.; Tsitsika A.                         | 2021 |
| 182 | Sexual quality of life in men <60 years old after coronary bypass surgery                                                                 | Ghazy T.; Haeberle E.J.; Kappert U.; Petzold S.; Plötze K.; Mashhour A.; Matschke K.; Ouda A.                                                        | 2021 |
| 183 | Developing a prediction model for the self-evaluation of erectile dysfunction in an adult male population                                 | Cai Z.; Li H.                                                                                                                                        | 2021 |
| 184 | Uncovering the Most Important Factors for Predicting Sexual Desire Using Explainable Machine Learning                                     | Vowels L.M.; Vowels M.J.; Mark K.P.                                                                                                                  | 2021 |
| 185 | Penile ring entrapment and strangulation: A case report at Kampala International University Teaching Hospital in Western Uganda           | Kyomukama L.A.; Ssebuufu R.; Wani S.A.; Waziri M.A.; Lule H.                                                                                         | 2021 |
| 186 | How the COVID-19 Pandemic Affects Sexual Behavior of Hetero-, Homo-, and Bisexual Males in Germany                                        | Mumm J.-N.; Vilsmaier T.; Schuetz J.M.; Rodler S.; Zati Zehni A.; Bauer R.M.; Staehler M.; Stief C.G.; Batz F.                                       | 2021 |
| 187 | Impact of COVID-19 Pandemic on the Sexual Function of Health Professionals From an Epicenter in Brazil                                    | Neto R.P.; Nascimento B.C.G.; Carvalho dos Anjos Silva G.; Barbosa J.A.B.A.; Júnior J.D.B.; Teixeira T.A.; Srougi M.; Nahas W.C.; Hallak J.; Cury J. | 2021 |
| 188 | Sexual Satisfaction and Frequency of Orgasm in Women With Chronic Pelvic Pain due to Endometriosis                                        | Hämmerli, S; Kohl-Schwartz, A; Imesch, P; Rauchfuss, M; Wölfler, MM; Häberlin, F; von Orelli, S; Leeners, B                                          | 2020 |
| 189 | Disparate Relationship of Sexual Satisfaction, Self-Esteem, Anxiety, and Depression with Endocrine Profiles of Women With or Without PCOS | Glowinska, A; Duleba, AJ; Zielona-Jenek, M; Siakowska, M; Pawelczyk, L; Banaszewska, B                                                               | 2020 |
| 190 | Exploratory study of erotic abilities in women's sexual practice                                                                          | Edard, A; Rusinek, S                                                                                                                                 | 2020 |
| 191 | Picking up good vibrations: Discrepant vibrator use, sexual functioning, and sexual well-being in women with male partners                | Gauvin, SEM; Yessick, L; Pukall, CF                                                                                                                  | 2020 |
| 192 | Assessment of long-term outcomes with immediate versus delayed surgical repair of penile fractures                                        | Haque, MF; Paul, AS; Swain, S; Goyal, G                                                                                                              | 2020 |

|     |                                                                                                                                                                |                                                                                                                                                         |      |
|-----|----------------------------------------------------------------------------------------------------------------------------------------------------------------|---------------------------------------------------------------------------------------------------------------------------------------------------------|------|
| 193 | Impact of the COVID-19 Pandemic on Partner Relationships and Sexual and Reproductive Health: Cross-Sectional, Online Survey Study                              | Li, GJ; Tang, DD; Song, B; Wang, C; Shen, QS; Xu, C; Geng, H; Wu, H; He, XJ; Cao, YX                                                                    | 2020 |
| 194 | Sexual desire and emotional reactivity in chronically hospitalized Lebanese patients with schizophrenia                                                        | Kazour, F; Obeid, S; Hallit, S                                                                                                                          | 2020 |
| 195 | Pornography Consumption, Modality and Function in a Large Internet Sample                                                                                      | Solano, I; Eaton, NR; O'Leary, KD                                                                                                                       | 2020 |
| 196 | Does Low-Cost Sexual Gratification Make Men Less Eager to Marry? Pornography Use, Masturbation, Hookup Sex, and Desire to Be Married Among Single Men          | Perry, SL                                                                                                                                               | 2020 |
| 197 | Body Image, Orgasmic Response, and Sexual Relationship Satisfaction: Understanding Relationships and Establishing Typologies Based on Body Image Satisfaction  | Horvath, Z; Smith, BH; Sal, D; Hevesi, K; Rowland, DL                                                                                                   | 2020 |
| 198 | Sexual Expression and Cognitive Function: Gender-Divergent Associations in Older Adults                                                                        | Wright, H; Jenks, RA; Lee, DM                                                                                                                           | 2020 |
| 199 | Sexual satisfaction and frequency of orgasm in women with chronic pelvic pain due to endometriosis                                                             | Hämmerli, Silvan;Kohl-Schwartz, Alexandra;Imesch, Patrick;Rauchfuss, Martina;Wölfler, Monika M.;Häberlin, Felix;von Orelli, Stephanie;Leeners, Brigitte | 2020 |
| 200 | Sexual Satisfaction and Frequency of Orgasm in Women With Chronic Pelvic Pain due to Endometriosis.                                                            | Hämmerli, Silvan;Kohl-Schwartz, Alexandra;Imesch, Patrick;Rauchfuss, Martina;Wölfler, Monika M;Häberlin, Felix;von Orelli, Stephanie;Leeners, Brigitte  | 2020 |
| 201 | Body Image, Orgasmic Response, and Sexual Relationship Satisfaction: Understanding Relationships and Establishing Typologies Based on Body Image Satisfaction. | Horvath, Zsolt;Smith, Betina Hodt;Sal, Dorottya;Hevesi, Krisztina;Rowland, David L                                                                      | 2020 |
| 202 | Does Low-Cost Sexual Gratification Make Men Less Eager to Marry? Pornography Use, Masturbation, Hookup Sex, and Desire to Be Married Among Single Men          | Perry, Samuel L                                                                                                                                         | 2020 |

|     |                                                                                                                                                        |                                                                                                                            |      |
|-----|--------------------------------------------------------------------------------------------------------------------------------------------------------|----------------------------------------------------------------------------------------------------------------------------|------|
| 203 | Does low-cost sexual gratification make men less eager to marry? Pornography use, masturbation, hookup sex, and desire to be married among single men  | Perry, Samuel L.                                                                                                           | 2020 |
| 204 | Does Low-Cost Sexual Gratification Make Men Less Eager to Marry? Pornography Use, Masturbation, Hookup Sex, and Desire to Be Married Among Single Men. | Perry, Samuel L                                                                                                            | 2020 |
| 205 | Étude exploratoire des habiletés érotiques en jeu dans la pratique sexuelle des femmes                                                                 | Edard, A.;Rusinek, S.                                                                                                      | 2020 |
| 206 | Sexual function, sexual dysfunctions, and ADHD: A systematic literature review                                                                         | Soldati, Lorenzo;Bianchi-Demicheli, Francesco;Schockaert, Pauline;Köhl, John;Bolmont, Mylène;Hasler, Roland;Perroud, Nader | 2020 |
| 207 | Sexual Function, Sexual Dysfunctions, and ADHD: A Systematic Literature Review.                                                                        | Soldati, Lorenzo;Bianchi-Demicheli, Francesco;Schockaert, Pauline;Köhl, John;Bolmont, Mylène;Hasler, Roland;Perroud, Nader | 2020 |
| 208 | Impact of the COVID-19 Pandemic on Partner Relationships and Sexual and Reproductive Health: Cross-Sectional, Online Survey Study.                     | Li, Guanjian;Tang, Dongdong;Song, Bing;Wang, Chao;Qunshan, Shen;Xu, Chuan;Geng, Hao;Wu, Huan;He, Xiaojin;Cao, Yunxia       | 2020 |
| 209 | Impact of the COVID-19 Pandemic on Partner Relationships and Sexual and Reproductive Health: Cross-Sectional, Online Survey Study                      | Li, Guanjian;Tang, Dongdong;Song, Bing;Wang, Chao;Shen Qunshan;Xu, Chuan;Geng, Hao;Wu, Huan;He, Xiaojin;Cao, Yunxia        | 2020 |
| 210 | Sexual expression and cognitive function: Gender-divergent associations in older adults                                                                | Wright, Hayley;Jenks, Rebecca A.;Lee, David M.                                                                             | 2020 |
| 211 | Sexual Expression and Cognitive Function: Gender-Divergent Associations in Older Adults.                                                               | Wright, Hayley;Jenks, Rebecca A;Lee, David M                                                                               | 2020 |
| 212 | Sexual Expression and Cognitive Function: Gender-Divergent Associations in Older Adults                                                                | Wright, Hayley;Jenks, Rebecca A;Lee, David M                                                                               | 2020 |
| 213 | Changes in sexual experiences and sexual satisfaction during pregnancy: data from a Greek secondary hospital                                           | Zacharis Konstantinos;Chrysafopoulou Eleni;Kravvaritis Stavros;Charitos Theodoros;Fouka Anastasia                          | 2020 |

|     |                                                                                                                                                            |                                                                                                                      |      |
|-----|------------------------------------------------------------------------------------------------------------------------------------------------------------|----------------------------------------------------------------------------------------------------------------------|------|
| 214 | Disparate Relationship of Sexual Satisfaction, Self-Esteem, Anxiety, and Depression with Endocrine Profiles of Women With or Without PCOS.                 | Glowinska, Aleksandra;Duleba, Antoni J;Zielona-Jenek, Monika;Siakowska, Martyna;Pawelczyk, Leszek;Banaszewska, Beata | 2020 |
| 215 | Sexuality, embodiment and attachment style in anorexia nervosa                                                                                             | Cassioli E.; Rossi E.; Castellini G.; Sensi C.; Mancini M.; Lelli L.; Monteleone A.M.; Ricca V.; Stanghellini G.     | 2020 |
| 216 | Does Low-Cost Sexual Gratification Make Men Less Eager to Marry? Pornography Use, Masturbation, Hookup Sex, and Desire to Be Married Among Single Men      | Perry S.L.                                                                                                           | 2020 |
| 217 | Genital Pain and Sexual Functioning: Effects on Sexual Experience, Psychological Health, and Quality of Life                                               | Nimbi F.M.; Rossi V.; Tripodi F.; Luria M.; Flinchum M.; Tambelli R.; Simonelli C.                                   | 2020 |
| 218 | Sexual Satisfaction and Frequency of Orgasm in Women With Chronic Pelvic Pain due to Endometriosis                                                         | Hämmerli S.; Kohl-Schwartz A.; Imesch P.; Rauchfuss M.; Wölfler M.M.; Häberlin F.; von Orelli S.; Leeners B.         | 2020 |
| 219 | Effects of pornography use and demographic parameters on sexual response during masturbation and partnered sex in women                                    | McNabney S.M.; Hevesi K.; Rowland D.L.                                                                               | 2020 |
| 220 | Sexual desire and emotional reactivity in chronically hospitalized Lebanese patients with schizophrenia                                                    | Kazour F.; Obeid S.; Hallit S.                                                                                       | 2020 |
| 221 | Assessment of long-term outcomes with immediate versus delayed surgical repair of penile fractures                                                         | Haque M.; Paul A.; Swain S.; Goyal G.                                                                                | 2020 |
| 222 | Exploratory study of erotic abilities in women's sexual practice; [Étude exploratoire des habiletés érotiques en jeu dans la pratique sexuelle des femmes] | Edard A.; Rusinek S.                                                                                                 | 2020 |
| 223 | Sexual Experiences of Young Transgender Persons During and After Gender-Affirmative Treatment                                                              | Bungener S.L.; De Vries A.L.C.; Popma A.; Steensma T.D.                                                              | 2020 |
| 224 | Counselled Patients with Stroke Still Experience Sexual and Relational Problems 1–5 Years After Stroke Rehabilitation                                      | Meesters J.J.L.; van de Ven D.P.H.W.; Kruijver E.; Bender J.; Volker W.G.; Vliet Vlieland T.P.M.; Goossens P.H.      | 2020 |
| 225 | Sexual Expression and Cognitive Function: Gender-Divergent Associations in Older Adults                                                                    | Wright H.; Jenks R.A.; Lee D.M.                                                                                      | 2020 |

|     |                                                                                                                                                               |                                                                                         |      |
|-----|---------------------------------------------------------------------------------------------------------------------------------------------------------------|-----------------------------------------------------------------------------------------|------|
| 226 | Disparate Relationship of Sexual Satisfaction, Self-Esteem, Anxiety, and Depression with Endocrine Profiles of Women With or Without PCOS                     | Glowinska A.; Duleba A.J.; Zielona-Jenek M.; Siakowska M.; Pawelczyk L.; Banaszewska B. | 2020 |
| 227 | Body Image, Orgasmic Response, and Sexual Relationship Satisfaction: Understanding Relationships and Establishing Typologies Based on Body Image Satisfaction | Horvath Z.; Smith B.H.; Sal D.; Hevesi K.; Rowland D.L.                                 | 2020 |
| 228 | Self-reported reasons for having difficulty reaching orgasm during partnered sex: relation to orgasmic pleasure                                               | Hevesi K.; Gergely Hevesi B.; Kolba T.N.; Rowland D.L.                                  | 2020 |
| 229 | Relationship Between Masturbation and Partnered Sex in Women: Does the Former Facilitate, Inhibit, or Not Affect the Latter?                                  | Rowland D.L.; Hevesi K.; Conway G.R.; Kolba T.N.                                        | 2020 |
| 230 | Medicalized Pleasure and Silenced Desire: Sexuality of People with Physical Disabilities                                                                      | Sakairi E.                                                                              | 2020 |
| 231 | Impact of the COVID-19 pandemic on partner relationships and sexual and reproductive health: Cross-sectional, online survey study                             | Li G.; Tang D.; Song B.; Wang C.; Qunshan S.; Xu C.; Geng H.; Wu H.; He X.; Cao Y.      | 2020 |
| 232 | Body Image Development and Sexual Satisfaction: A Prospective Study From Adolescence to Adulthood                                                             | Kvalem, IL; Træen, B; Markovic, A; von Soest, T                                         | 2019 |
| 233 | Sexual Activity and Sexual Satisfaction Among Older Adults in Four European Countries                                                                         | Træen, B; Stulhofer, A; Janssen, E; Carvalheira, AA; Hald, GM; Lange, T; Graham, C      | 2019 |
| 234 | Sexual activity and life satisfaction in older adults                                                                                                         | Skalacka, K; Gerymski, R                                                                | 2019 |
| 235 | Pornography, preference for porn-like sex, masturbation, and men's sexual and relationship satisfaction                                                       | Miller, DJ; McBain, KA; Li, WW; Raggatt, PTF                                            | 2019 |
| 236 | Relationship of Specific Sexual Activities to Orgasmic Latency, Pleasure, and Difficulty During Partnered Sex                                                 | Rowland, DL; Kolba, TN                                                                  | 2019 |
| 237 | Sexuality Among Adults with Congenital Deafblindness: A Cross-Sectional Survey Study Among Primary Carers                                                     | Dammeyer, J; Lehane, CM; Chapman, M                                                     | 2019 |

|     |                                                                                                                                                                          |                                                                                                      |      |
|-----|--------------------------------------------------------------------------------------------------------------------------------------------------------------------------|------------------------------------------------------------------------------------------------------|------|
| 238 | Sexual Well-Being in Older Men and Women: Construction and Validation of a Multi-Dimensional Measure in Four European Countries                                          | Stulhofer, A; Jurin, T; Graham, C; Enzlin, P; Træen, B                                               | 2019 |
| 239 | Sexual Experiences and Sexual Orientation among Transgender - Adolescents                                                                                                | Stübler, ML; Becker-Hebly, I                                                                         | 2019 |
| 240 | Contextualizing use of sexual media: Just the first step                                                                                                                 | Ley, David J.                                                                                        | 2019 |
| 241 | Porn is for masturbation                                                                                                                                                 | Prause, Nicole                                                                                       | 2019 |
| 242 | Where does masturbation fit in all this? We need to incorporate measures of solo-masturbation in models connecting sexual media use to sexual quality (or anything else) | Perry, Samuel L.                                                                                     | 2019 |
| 243 | Sexual well-being in older men and women: Construction and validation of a multi-dimensional measure in four European countries                                          | Štulhofer, Aleksandar;Jurin, Tanja;Graham, Cynthia;Enzlin, Paul;Træen, Bente                         | 2019 |
| 244 | Sexual Well-Being in Older Men and Women: Construction and Validation of a Multi-Dimensional Measure in Four European Countries                                          | Štulhofer, Aleksandar;Jurin, Tanja;Graham, Cynthia;Enzlin, Paul;Træen, Bente                         | 2019 |
| 245 | Sexuality among adults with congenital deafblindness: A cross-sectional survey study among primary carers                                                                | Dammeyer, Jesper;Lehane, Christine M.;Chapman, Madeleine                                             | 2019 |
| 246 | Sexuality Among Adults with Congenital Deafblindness: A Cross-Sectional Survey Study Among Primary Carers                                                                | Dammeyer, Jesper;Lehane, Christine M;Chapman, Madeleine                                              | 2019 |
| 247 | Body Image Development and Sexual Satisfaction: A Prospective Study From Adolescence to Adulthood                                                                        | Kvalem, Ingela Lundin;Træen, Bente;Markovic, Aleksandra;von Soest, Tilmann                           | 2019 |
| 248 | Body image development and sexual satisfaction: A prospective study from adolescence to adulthood                                                                        | Kvalem, Ingela Lundin;Træen, Bente;Markovic, Aleksandra;von Soest, Tilmann                           | 2019 |
| 249 | Body Image Development and Sexual Satisfaction: A Prospective Study From Adolescence to Adulthood.                                                                       | Kvalem, Ingela Lundin;Træen, Bente;Markovic, Aleksandra;von Soest, Tilmann                           | 2019 |
| 250 | Frequência sexual e variabilidade da frequência cardíaca numa amostra não-clínica: Resultados preliminares                                                               | Gomes, Sabrina;Costa, Rui Miguel;Mangia, Paula;Pestana, José;Coelho, Mafalda Pinto;Correia, Catarina | 2019 |

|     |                                                                                                                |                                                                                                                             |      |
|-----|----------------------------------------------------------------------------------------------------------------|-----------------------------------------------------------------------------------------------------------------------------|------|
| 251 | Sexual activity and life satisfaction in older adults                                                          | Skalacka, Katarzyna;Gerymski, Rafał                                                                                         | 2019 |
| 252 | Sexual activity and life satisfaction in older adults                                                          | Skalacka, Katarzyna;Gerymski, Rafał                                                                                         | 2019 |
| 253 | Sexual activity and life satisfaction in older adults.                                                         | Skalacka, Katarzyna;Gerymski, Rafał                                                                                         | 2019 |
| 254 | Relationship of specific sexual activities to orgasmic latency, pleasure, and difficulty during partnered sex  | Rowland, David L.;Kolba, Tiffany N.                                                                                         | 2019 |
| 255 | Relationship of Specific Sexual Activities to Orgasmic Latency, Pleasure, and Difficulty During Partnered Sex. | Rowland, David L;Kolba, Tiffany N                                                                                           | 2019 |
| 256 | Sexual activity and sexual satisfaction among older adults in four European countries                          | Træen, Bente;Štulhofer, Aleksandar;Janssen, Erick;Carvalheira, Ana Alexandra;Hald, Gert Martin;Lange, Theis;Graham, Cynthia | 2019 |
| 257 | Sexual Activity and Sexual Satisfaction Among Older Adults in Four European Countries.                         | Træen, Bente;Štulhofer, Aleksandar;Janssen, Erick;Carvalheira, Ana Alexandra;Hald, Gert Martin;Lange, Theis;Graham, Cynthia | 2019 |
| 258 | Sexual Activity and Sexual Satisfaction Among Older Adults in Four European Countries                          | Træen, Bente;Štulhofer, Aleksandar;Janssen, Erick;Carvalheira, Ana Alexandra;Gert Martin Hald;Lange, Theis;Graham, Cynthia  | 2019 |
| 259 | Pornography, preference for porn-like sex, masturbation, and men's sexual and relationship satisfaction        | Miller, Dan J.;McBain, Kerry A.;Li, Wendy W.;Raggatt, Peter T. F.                                                           | 2019 |
| 260 | Sexuelle Erfahrungen und sexuelle Orientierung von Transgender-Jugendlichen                                    | Stübler, Marie Louise;Becker-Hebly, Inga                                                                                    | 2019 |
| 261 | Sexuelle Erfahrungen und sexuelle Orientierung von Transgender-Jugendlichen                                    | Stübler, Marie Louise;Becker-Hebly, Inga                                                                                    | 2019 |
| 262 | Pornography, preference for porn-like sex, masturbation, and men's sexual and relationship satisfaction        | Miller, Dan J;McBain, Kerry A;Li, Wendy W;Raggatt, Peter T F                                                                | 2019 |
| 263 | THE POINT OF NO RETURN                                                                                         | Pinkerton, Nick                                                                                                             | 2019 |
| 264 | Relationship of Specific Sexual Activities to Orgasmic Latency, Pleasure, and Difficulty During Partnered Sex  | Rowland D.L.; Kolba T.N.                                                                                                    | 2019 |

|     |                                                                                                                                                                                                                    |                                                                                                            |      |
|-----|--------------------------------------------------------------------------------------------------------------------------------------------------------------------------------------------------------------------|------------------------------------------------------------------------------------------------------------|------|
| 265 | Predictive Factors of Male Sexual Dysfunction after Traumatic Spinal Cord Injury                                                                                                                                   | Ferro J.K.D.O.; Lemos A.; Silva C.P.D.; Lima C.R.O.D.P.; Raposo M.C.F.; Cavalcanti G.D.A.; Oliveira D.A.D. | 2019 |
| 266 | Sexual Activity and Sexual Satisfaction Among Older Adults in Four European Countries                                                                                                                              | Træen B.; Štulhofer A.; Janssen E.; Carvalheira A.A.; Hald G.M.; Lange T.; Graham C.                       | 2019 |
| 267 | Sexual frequency and heart rate variability in a portuguese non-clinical sample: Preliminary results; [Frequência sexual e variabilidade da frequência cardíaca numa amostra não-clínica: Resultados preliminares] | Gomes S.; Costa R.M.; Mangia P.; Pestana J.; Coelho M.P.; Correia C.                                       | 2019 |
| 268 | The Role of Sadomasochism in Shaping Violent Sexual Motivation                                                                                                                                                     | Semerikova A.A.; Novgorodtsev V.M.; Efimenko D.B.; Melnikova T.E.                                          | 2019 |
| 269 | Body Image Development and Sexual Satisfaction: A Prospective Study From Adolescence to Adulthood                                                                                                                  | Kvalem I.L.; Træen B.; Markovic A.; von Soest T.                                                           | 2019 |
| 270 | Sexuality Among Adults with Congenital Deafblindness: A Cross-Sectional Survey Study Among Primary Carers                                                                                                          | Dammeyer J.; Lehane C.M.; Chapman M.                                                                       | 2019 |
| 271 | Sexual Well-Being in Older Men and Women: Construction and Validation of a Multi-Dimensional Measure in Four European Countries                                                                                    | Štulhofer A.; Jurin T.; Graham C.; Enzlin P.; Træen B.                                                     | 2019 |
| 272 | Sexual Experiences and Sexual Orientation among Transgender Adolescents; [Sexuelle Erfahrungen und sexuelle Orientierung von Transgender-Jugendlichen]                                                             | Stübler M.L.; Becker-Hebly I.                                                                              | 2019 |
| 273 | Sexual activity and life satisfaction in older adults                                                                                                                                                              | Skalacka K.; Gerymski R.                                                                                   | 2019 |
| 274 | Pornography, preference for porn-like sex, masturbation, and men's sexual and relationship satisfaction                                                                                                            | Miller D.J.; McBain K.A.; Li W.W.; Raggatt P.T.F.                                                          | 2019 |
| 275 | Retrograde ejaculation associated with quetiapine and treatment with low-dose imipramine                                                                                                                           | Roughley M.; Lyall M.                                                                                      | 2019 |
| 276 | Sexual satisfaction of patients after the resection of an epileptic focus                                                                                                                                          | Krasuski, T; Jedrzejczak, J; Rysz, A; Owczarek, K                                                          | 2018 |



|     |                                                                                                                                                                             |                                                                                                                                     |      |
|-----|-----------------------------------------------------------------------------------------------------------------------------------------------------------------------------|-------------------------------------------------------------------------------------------------------------------------------------|------|
| 277 | Your Vagina Is Not Supposed to Be This Scary Monster: Young Heterosexual Women's Recommendations for Improving Sexual Satisfaction and Implications for Sexuality Education | Blunt-Vinti, HD; Stokowski, SE; Bouza, BM                                                                                           | 2018 |
| 278 | The Relevance of Sexual Concerns and Adult Attachment for Sexual Functioning                                                                                                | Hoy, M; Strauss, B; Brenk-Franz, K                                                                                                  | 2018 |
| 279 | Orgasmic Latency and Related Parameters in Women During Partnered and Masturbatory Sex                                                                                      | Rowland, DL; Sullivan, SL; Hevesi, K; Hevesi, B                                                                                     | 2018 |
| 280 | Reasons for Pornography Consumption: Associations with Gender, Psychological and Physical Sexual Satisfaction, and Attitudinal Impacts                                      | Emmers-Sommer, TM                                                                                                                   | 2018 |
| 281 | Sexual Functioning in a Cohort of Pakistani Men with Spinal Cord Injury                                                                                                     | Bin Ayaz, S; Qureshi, AR; Ahmad, A; Gill, ZA; Ahmad, N; Butt, AW                                                                    | 2018 |
| 282 | Validation of a Visual Analogue Scale to measure the subjective perception of orgasmic intensity in females: The Orgasmometer-F                                             | Mollaioli, D; Di Sante, S; Limoncin, E; Ciocca, G; Gravina, GL; Maseroli, E; Fanni, E; Vignozzi, L; Maggi, M; Lenzi, A; Jannini, EA | 2018 |
| 283 | Sexual functioning in a cohort of Pakistani men with spinal cord injury                                                                                                     | Ayaz, Saeed Bin;Qureshi, Ali Raza;Ahmad, Arshia;Gill, Zaheer Ahmed;Ahmad, Nadeem;Butt, Aamir Waheed                                 | 2018 |
| 284 | Sexual Functioning in a Cohort of Pakistani Men with Spinal Cord Injury                                                                                                     | Saeed Bin Ayaz;Ali Raza Qureshi;Ahmad, Arshia;Zaheer Ahmed Gill;Ahmad, Nadeem;Aamir Waheed Butt                                     | 2018 |
| 285 | Die Bedeutung von sexuellen Bedenken und Bindung für spezifische sexuelle Funktionsbereiche                                                                                 | Hoy, Madita;Strauß, Bernhard;Brenk-Franz, Katja                                                                                     | 2018 |
| 286 | [The Relevance of Sexual Concerns and Adult Attachment for Sexual Functioning].                                                                                             | Hoy, Madita;Strauß, Bernhard;Brenk-Franz, Katja                                                                                     | 2018 |
| 287 | Orgasmic latency and related parameters in women during partnered and masturbatory sex                                                                                      | Rowland, David L.;Sullivan, Shelbie L.;Hevesi, Krizstina;Hevesi, Barbara                                                            | 2018 |
| 288 | Orgasmic Latency and Related Parameters in Women During Partnered and Masturbatory Sex.                                                                                     | Rowland, David L;Sullivan, Shelbie L;Hevesi, Krizstina;Hevesi, Barbara                                                              | 2018 |

|     |                                                                                                                                        |                                                                                                                                                                                             |      |
|-----|----------------------------------------------------------------------------------------------------------------------------------------|---------------------------------------------------------------------------------------------------------------------------------------------------------------------------------------------|------|
| 289 | Validation of a Visual Analogue Scale to measure the subjective perception of orgasmic intensity in females: The Orgasmometer-F        | Mollaioli, Daniele;Di Sante, Stefania;Limoncin, Erika;Ciocca, Giacomo;Gravina, Giovanni Luca;Maseroli, Elisa;Fanni, Egidia;Vignozzi, Linda;Maggi, Mario;Lenzi, Andrea;Jannini, Emmanuele A. | 2018 |
| 290 | Validation of a Visual Analogue Scale to measure the subjective perception of orgasmic intensity in females: The Orgasmometer-F        | Mollaioli, Daniele;Stefania Di Sante;Limoncin, Erika;Ciocca, Giacomo;Gravina, Giovanni Luca;Maseroli, Elisa;Fanni, Egidia;Vignozzi, Linda;Maggi, Mario;Lenzi, Andrea;Emmanuele A Jannini ×  | 2018 |
| 291 | [Surgical repair of the tunica albuginea for penis fracture: Selection of incision].                                                   | Mao, Yuan-Shen;Hua, Bao;Pan, Wei-Xin;Li, Wen-Feng;Gu, Yu-Fei;Yao, Hai-Jun;Cai, Zhi-Kang;Wang, Zhong;Lu, Chao                                                                                | 2018 |
| 292 | Reasons for pornography consumption: Associations with gender, psychological and physical sexual satisfaction, and attitudinal impacts | Emmers-Sommer, Tara M.                                                                                                                                                                      | 2018 |
| 293 | Reasons for Pornography Consumption: Associations with Gender, Psychological and Physical Sexual Satisfaction, and Attitudinal Impacts | Emmers-Sommer, Tara M                                                                                                                                                                       | 2018 |
| 294 | Validation of a Visual Analogue Scale to measure the subjective perception of orgasmic intensity in females: The Orgasmometer-F.       | Mollaioli, Daniele;Di Sante, Stefania;Limoncin, Erika;Ciocca, Giacomo;Gravina, Giovanni Luca;Maseroli, Elisa;Fanni, Egidia;Vignozzi, Linda;Maggi, Mario;Lenzi, Andrea;Jannini, Emmanuele A  | 2018 |
| 295 | Bridging exhibitionism and internet pornography: Is there a link?                                                                      | Chet L.S.; Lin L.J.; Sidi H.; Zakaria H.; Yahaya R.                                                                                                                                         | 2018 |
| 296 | Women's Sexual Health and Aging                                                                                                        | Granville L.; Pregler J.                                                                                                                                                                    | 2018 |
| 297 | Sexuality and Cognitive Status: A U.S. Nationally Representative Study of Home-Dwelling Older Adults                                   | Lindau S.T.; Dale W.; Feldmeth G.; Gavrilova N.; Langa K.M.; Makelarski J.A.; Wroblewski K.                                                                                                 | 2018 |
| 298 | Validation of a Visual Analogue Scale to measure the subjective perception of orgasmic intensity in females: The Orgasmometer-F        | Mollaioli D.; Sante S.D.; Limoncin E.; Ciocca G.; Gravina G.L.; Maseroli E.; Fanni E.; Vignozzi L.; Maggi M.; Lenzi A.; Jannini E.A.                                                        | 2018 |

|     |                                                                                                                                                                             |                                                                                                        |      |
|-----|-----------------------------------------------------------------------------------------------------------------------------------------------------------------------------|--------------------------------------------------------------------------------------------------------|------|
| 299 | Sexual satisfaction of patients after the resection of an epileptic focus                                                                                                   | Krasuski T.; Jędrzejczak J.; Rysz A.; Owczarek K.                                                      | 2018 |
| 300 | Chronic periodontal disease correlated with sexual function in young males                                                                                                  | Chou M.-H.; Liu C.-Y.; Yang M.-H.; Chou Y.-C.; Wu S.-T.; Cha T.-L.; Tsao C.-W.                         | 2018 |
| 301 | Sexual Functioning in a Cohort of Pakistani Men with Spinal Cord Injury                                                                                                     | Ayaz S.B.; Qureshi A.R.; Ahmad A.; Gill Z.A.; Ahmad N.; Butt A.W.                                      | 2018 |
| 302 | No. 279-Female Sexual Health Consensus Clinical Guidelines                                                                                                                  | Lamont J.; Bajzak K.; Bouchard C.; Burnett M.; Byers S.; Cohen T.; Fisher W.; Holzapfel S.; Senikas V. | 2018 |
| 303 | Orgasmic Latency and Related Parameters in Women During Partnered and Masturbatory Sex                                                                                      | Rowland D.L.; Sullivan S.L.; Hevesi K.; Hevesi B.                                                      | 2018 |
| 304 | Sexual Inhibition is a Vulnerability Factor for Orgasm Problems in Women                                                                                                    | Tavares I.M.; Laan E.T.M.; Nobre P.J.                                                                  | 2018 |
| 305 | Reasons for Pornography Consumption: Associations with Gender, Psychological and Physical Sexual Satisfaction, and Attitudinal Impacts                                      | Emmers-Sommer T.M.                                                                                     | 2018 |
| 306 | Sexual function and quality of life of women adopting the levonorgestrel-releasing intrauterine system (LNG-IUS 13.5 mg) after abortion for unintended pregnancy            | Caruso S.; Cianci S.; Vitale S.G.; Fava V.; Cutello S.; Cianci A.                                      | 2018 |
| 307 | The Relevance of Sexual Concerns and Adult Attachment for Sexual Functioning; [Die Bedeutung von sexuellen Bedenken und Bindung für spezifische sexuelle Funktionsbereiche] | Hoy M.; Strau B.; Brenk-Franz K.                                                                       | 2018 |
| 308 | Dyadic and individual problems of Iranian men with premature ejaculation                                                                                                    | Bolghan-Abadi M.; Ahmadi S.A.; Bahrami F.; Fatehizade M.; Jazayeri R.                                  | 2018 |
| 309 | Prevalence of sexual dysfunctions and other sexual disorders in adults with attention-deficit/hyperactivity disorder compared to the general population                     | Bijlenga D.; Vroege J.A.; Stammen A.J.M.; Breuk M.; Boonstra A.M.; van der Rhee K.; Kooij J.J.S.       | 2018 |
| 310 | Satisfaction guaranteed? How individual, partner, and relationship factors impact sexual satisfaction within partnerships                                                   | Velten, J; Margraf, J                                                                                  | 2017 |

|     |                                                                                                                                 |                                                                                                                                                            |      |
|-----|---------------------------------------------------------------------------------------------------------------------------------|------------------------------------------------------------------------------------------------------------------------------------------------------------|------|
| 311 | Attachment tendencies and sexual activities: The mediating role of representations of sex                                       | Favez, N; Tissot, H                                                                                                                                        | 2017 |
| 312 | Subjective sleep quality, unstimulated sexual arousal, and sexual frequency                                                     | Costa, R; Costa, D; Pestana, J                                                                                                                             | 2017 |
| 313 | How Do Psychological Risk Factors Predict Sexual Outcomes? A Comparison of Four Models of Young Women's Sexual Outcomes         | Tutino, JS; Ouimet, AJ; Shaughnessy, K                                                                                                                     | 2017 |
| 314 | Sexual Function and Quality of Life Before and After Penile Prosthesis Implantation Following Radial Forearm Flap Phalloplasty  | Young, EE; Friedlander, D; Lue, K; Anele, UA; Khurgin, JL; Bivalacqua, TJ; Burnett, AL; Redett, RJ; Gearhart, JP                                           | 2017 |
| 315 | Subjective sleep quality, unstimulated sexual arousal, and sexual frequency.                                                    | Costa, Rui;Costa, David;Pestana, José                                                                                                                      | 2017 |
| 316 | How do psychological risk factors predict sexual outcomes? A comparison of four models of young women's sexual outcomes         | Tutino, Jessica S.;Ouimet, Allison J.;Shaughnessy, Krystelle                                                                                               | 2017 |
| 317 | How Do Psychological Risk Factors Predict Sexual Outcomes? A Comparison of Four Models of Young Women's Sexual Outcomes.        | Tutino, Jessica S;Ouimet, Allison J;Shaughnessy, Krystelle                                                                                                 | 2017 |
| 318 | Attachment tendencies and sexual activities: The mediating role of representations of sex                                       | Favez, Nicolas;Tissot, Hervé                                                                                                                               | 2017 |
| 319 | Attachment tendencies and sexual activities: The mediating role of representations of sex                                       | Favez, Nicolas;Tissot, Hervé                                                                                                                               | 2017 |
| 320 | Sexual Function and Quality of Life Before and After Penile Prosthesis Implantation Following Radial Forearm Flap Phalloplasty. | Young, Ezekiel E;Friedlander, Daniel;Lue, Kathy;Anele, Uzoma A;Khurgin, Jacob L;Bivalacqua, Trinity J;Burnett, Arthur L;Redett, Richard J;Gearhart, John P | 2017 |
| 321 | Satisfaction guaranteed? How individual, partner, and relationship factors impact sexual satisfaction within partnerships       | Velten, Julia;Margraf, Jürgen                                                                                                                              | 2017 |
| 322 | Satisfaction guaranteed? How individual, partner, and relationship factors impact sexual satisfaction within partnerships       | Velten, Julia;Margraf, Jürgen                                                                                                                              | 2017 |

|     |                                                                                                                                     |                                                                                                                                                                                    |      |
|-----|-------------------------------------------------------------------------------------------------------------------------------------|------------------------------------------------------------------------------------------------------------------------------------------------------------------------------------|------|
| 323 | Men's sexual and relational adaptations to erectile dysfunction after prostate cancer treatment                                     | Wassersug, Richard J.;Westle, Andrew;Dowsett, Gary W.                                                                                                                              | 2017 |
| 324 | Satisfaction guaranteed? How individual, partner, and relationship factors impact sexual satisfaction within partnerships.          | Velten, Julia;Margraf, Jürgen                                                                                                                                                      | 2017 |
| 325 | Men's Sexual and Relational Adaptations to Erectile Dysfunction After Prostate Cancer Treatment                                     | Wassersug, Richard J.;Westle, Andrew;Dowsett, Gary W.                                                                                                                              | 2017 |
| 326 | The relationship between sexual behavior and internet addiction severity in a sample of heterosexual university students from Italy | Scimeca G.; Muscatello M.R.A.; Chisari C.; Crucitti M.; Pandolfo G.; Zoccali R.; Bruno A.                                                                                          | 2017 |
| 327 | Men's Sexual and Relational Adaptations to Erectile Dysfunction After Prostate Cancer Treatment                                     | Wassersug R.J.; Westle A.; Dowsett G.W.                                                                                                                                            | 2017 |
| 328 | Correlates of Sex Frequency and Sexual Satisfaction Among Partnered Older Adults                                                    | Gillespie B.J.                                                                                                                                                                     | 2017 |
| 329 | Satisfaction guaranteed? How individual, partner, and relationship factors impact sexual satisfaction within partnerships           | Velten J.; Margraf J.                                                                                                                                                              | 2017 |
| 330 | A Longitudinal Study of Motivations Before and Psychosexual Outcomes After Genital Gender-Confirming Surgery in Transmen            | van de Grift T.C.; Pigot G.L.S.; Boudhan S.; Elfering L.; Kreukels B.P.C.; Gijs L.A.C.L.; Buncamper M.E.; Özer M.; van der Sluis W.; Meuleman E.J.H.; Bouman M.-B.; Mullender M.G. | 2017 |
| 331 | Sexual function in young women with type 1 diabetes: the METRO study                                                                | Maiorino M.I.; Bellastella G.; Castaldo F.; Petrizzo M.; Giugliano D.; Esposito K.                                                                                                 | 2017 |
| 332 | Attachment tendencies and sexual activities: The mediating role of representations of sex                                           | Favez N.; Tissot H.                                                                                                                                                                | 2017 |
| 333 | Subjective sleep quality, unstimulated sexual arousal, and sexual frequency                                                         | Costa R.; Costa D.; Pestana J.                                                                                                                                                     | 2017 |
| 334 | Sexual dysfunction in diabetic patients - An important and overlooked complication                                                  | Piątkiewicz P.; Krasuski T.; Maksymiuk-Kłos A.; Owczarek K.                                                                                                                        | 2017 |

|     |                                                                                                                                                                               |                                                                                                                                                       |      |
|-----|-------------------------------------------------------------------------------------------------------------------------------------------------------------------------------|-------------------------------------------------------------------------------------------------------------------------------------------------------|------|
| 335 | How Do Psychological Risk Factors Predict Sexual Outcomes? A Comparison of Four Models of Young Women's Sexual Outcomes                                                       | Tutino J.S.; Ouimet A.J.; Shaughnessy K.                                                                                                              | 2017 |
| 336 | Sexual Function and Quality of Life Before and After Penile Prosthesis Implantation Following Radial Forearm Flap Phalloplasty                                                | Young E.E.; Friedlander D.; Lue K.; Anele U.A.; Khurgin J.L.; Bivalacqua T.J.; Burnett A.L.; Redett R.J.; Gearhart J.P.                               | 2017 |
| 337 | Female Sexual Dysfunction—Medical and Psychological Treatments, Committee 14                                                                                                  | Kingsberg S.A.; Althof S.; Simon J.A.; Bradford A.; Bitzer J.; Carvalho J.; Flynn K.E.; Nappi R.E.; Reese J.B.; Rezaee R.L.; Schover L.; Shifrin J.L. | 2017 |
| 338 | Implicit and Explicit Sexual Attitudes: How Are They Related to Sexual Desire and Sexual Satisfaction in Men and Women?                                                       | Dosch, A; Belayachi, S; Van der Linden, M                                                                                                             | 2016 |
| 339 | Sexual well-being of older men and women                                                                                                                                      | Santos-Iglesias, P; Byers, ES; Moglia, R                                                                                                              | 2016 |
| 340 | Personality traits, gender roles and sexual behaviours of young adult males                                                                                                   | Kurpisz, J; Mak, M; Lew-Starowicz, M; Nowosielski, K; Bienkowski, P; Kowalczyk, R; Misiak, B; Frydecka, D; Samochowiec, J                             | 2016 |
| 341 | Psychological Factors Involved in Sexual Desire, Sexual Activity, and Sexual Satisfaction: A Multi-factorial Perspective                                                      | Dosch, A; Roachat, L; Ghisletta, P; Favez, N; Van der Linden, M                                                                                       | 2016 |
| 342 | Clitorally Stimulated Orgasms Are Associated With Better Control of Sexual Desire, and Not Associated With Depression or Anxiety, Compared With Vaginally Stimulated Orgasms  | Prause, N; Kuang, L; Lee, P; Miller, G                                                                                                                | 2016 |
| 343 | Male masturbation habits and sexual dysfunctions                                                                                                                              | Porto, R                                                                                                                                              | 2016 |
| 344 | Habitudes masturbatoires et dysfonctions sexuelles masculines                                                                                                                 | Porto, R.                                                                                                                                             | 2016 |
| 345 | Clitorally stimulated orgasms are associated with better control of sexual desire, and not associated with depression or anxiety, compared with vaginally stimulated orgasms  | Prause, Nicole;Kuang, Lambert;Lee, Peter;Miller, Geoffrey                                                                                             | 2016 |
| 346 | Clitorally Stimulated Orgasms Are Associated With Better Control of Sexual Desire, and Not Associated With Depression or Anxiety, Compared With Vaginally Stimulated Orgasms. | Prause, Nicole;Kuang, Lambert;Lee, Peter;Miller, Geoffrey                                                                                             | 2016 |

|     |                                                                                                                           |                                                                                                                                                                     |      |
|-----|---------------------------------------------------------------------------------------------------------------------------|---------------------------------------------------------------------------------------------------------------------------------------------------------------------|------|
| 347 | Psychological Factors Involved in Sexual Desire, Sexual Activity, and Sexual Satisfaction: A Multi-factorial Perspective. | Dosch, Alessandra;Rochat, Lucien;Ghisletta, Paolo;Favez, Nicolas;Van der Linden, Martial                                                                            | 2016 |
| 348 | Psychological Factors Involved in Sexual Desire, Sexual Activity, and Sexual Satisfaction: A Multi-factorial Perspective  | Dosch, Alessandra;Rochat, Lucien;Ghisletta, Paolo;Favez, Nicolas;Van der Linden, Martial                                                                            | 2016 |
| 349 | Psychological factors involved in sexual desire, sexual activity, and sexual satisfaction: A multi-factorial perspective  | Dosch, Alessandra;Rochat, Lucien;Ghisletta, Paolo;Favez, Nicolas;Linden, Martial                                                                                    | 2016 |
| 350 | Personality traits, gender roles and sexual behaviours of young adult males                                               | Kurpisz, Jacek;Mak, Monika;Lew-Starowicz, Michał;Nowosielski, Krzysztof;Bieńkowski, Przemysław;Kowalczyk, Robert;Misiak, Błażej;Frydecka, Dorota;Samochowiec, Jerzy | 2016 |
| 351 | The impact of ejaculatory dysfunction upon the sufferer and his partner.                                                  | Abdo, Carmita Helena Najjar                                                                                                                                         | 2016 |
| 352 | Sexual well-being of older men and women                                                                                  | Santos-Iglesias, Pablo;Byers, E Sandra;Moglia, Ronald                                                                                                               | 2016 |
| 353 | Altered states of consciousness are related to higher sexual responsiveness                                               | Costa, Rui M.;Pestana, José;Costa, David;Wittmann, Marc                                                                                                             | 2016 |
| 354 | Sexual well-being of older men and women                                                                                  | Santos-Iglesias, Pablo;Byers, E. Sandra;Moglia, Ronald                                                                                                              | 2016 |
| 355 | Personality traits, gender roles and sexual behaviours of young adult males                                               | Kurpisz, Jacek;Mak, Monika;Lew-Starowicz, Michał;Nowosielski, Krzysztof;Bieńkowski, Przemysław;Kowalczyk, Robert;Misiak, Błażej;Frydecka, Dorota;Samochowiec, Jerzy | 2016 |
| 356 | Personality traits, gender roles and sexual behaviours of young adult males.                                              | Kurpisz, Jacek;Mak, Monika;Lew-Starowicz, Michał;Nowosielski, Krzysztof;Bieńkowski, Przemysław;Kowalczyk, Robert;Misiak, Błażej;Frydecka, Dorota;Samochowiec, Jerzy | 2016 |
| 357 | Sexual health and well-being among older men and women in England: Findings from the English Longitudinal Study of Ageing | Lee, D.M.; Nazroo, J.; O'Connor, D.B.; Blake, M.; Pendleton, N.                                                                                                     | 2016 |

|     |                                                                                                                                                                              |                                                                                                                           |      |
|-----|------------------------------------------------------------------------------------------------------------------------------------------------------------------------------|---------------------------------------------------------------------------------------------------------------------------|------|
| 358 | Clitorally Stimulated Orgasms Are Associated With Better Control of Sexual Desire, and Not Associated With Depression or Anxiety, Compared With Vaginally Stimulated Orgasms | Prause N.; Kuang L.; Lee P.; Miller G.                                                                                    | 2016 |
| 359 | A rubber tube in the bladder as a complication of autoerotic stimulation of the urethra                                                                                      | Stamatiou K.; Moschouris H.                                                                                               | 2016 |
| 360 | The prevalence of sexual activity, and sexual dysfunction and behaviours in postmenopausal woman in Poland                                                                   | Czajkowska K.B.; Lew-Starowicz Z.; Szymańska M.                                                                           | 2016 |
| 361 | Women with Disabilities' Perceptions of Sexuality, Sexual Abuse and Masturbation                                                                                             | Morales E.; Gauthier V.; Edwards G.; Courtois F.                                                                          | 2016 |
| 362 | Personality traits, gender roles and sexual behaviours of young adult males                                                                                                  | Kurpisz J.; Mak M.; Lew-Starowicz M.; Nowosielski K.; Bienkowski P.; Kowalczyk R.; Misiak B.; Frydecka D.; Samochowiec J. | 2016 |
| 363 | Male attitude towards masturbating: an impediment to infertility evaluation and sperm parameters                                                                             | Pottinger A.M.; Carroll K.; Mason G.                                                                                      | 2016 |
| 364 | Psychological Factors Involved in Sexual Desire, Sexual Activity, and Sexual Satisfaction: A Multi-factorial Perspective                                                     | Dosch A.; Rochat L.; Ghisletta P.; Favez N.; Van der Linden M.                                                            | 2016 |
| 365 | Male masturbation device for the treatment of premature ejaculation                                                                                                          | Rodríguez J.E.; López A.                                                                                                  | 2016 |
| 366 | Sexual activity during Pregnancy                                                                                                                                             | Staruch M.; Kucharczyk A.; Zawadzka K.; Wielgos M.; Szymusik I.                                                           | 2016 |
| 367 | Male masturbation habits and sexual dysfunctions; [Habitudes masturbatoires et dysfonctions sexuelles masculines]                                                            | Porto R.                                                                                                                  | 2016 |
| 368 | Which are the male factors associated with female sexual dysfunction (FSD)?                                                                                                  | Maseroli E.; Fanni E.; Mannucci E.; Fambrini M.; Jannini E.A.; Maggi M.; Vignozzi L.                                      | 2016 |
| 369 | Sexual Satisfaction, Sexual Compatibility, and Relationship Adjustment in Couples: The Role of Sexual Behaviors, Orgasm, and Men's Discernment of Women's Intercourse Orgasm | Klapilová, K; Brody, S; Krejcová, L; Husárová, B; Binter, J                                                               | 2015 |



|     |                                                                                                                                                                              |                                                                                                                  |      |
|-----|------------------------------------------------------------------------------------------------------------------------------------------------------------------------------|------------------------------------------------------------------------------------------------------------------|------|
| 370 | The Relationship Between Sexual Satisfaction and Psychological Health of Prison Inmates: The Moderating Effects of Sexual Abstinence and Gender                              | Carcedo, RJ; Perlman, D; López, F; Orgaz, MB; Fernández-Rouco, N                                                 | 2015 |
| 371 | Sexuality for Women With Spinal Cord Injury                                                                                                                                  | Cramp, JD; Courtois, FJ; Ditor, DS                                                                               | 2015 |
| 372 | Relationships and sexual expression in later life: a biopsychosocial perspective                                                                                             | DeLamater, J; Koepsel, E                                                                                         | 2015 |
| 373 | Sexual Dysfunctional Beliefs Questionnaire (SDBQ): Translation and Psychometric Properties of the Iranian Version                                                            | Abdolmanafi, A; Azadfallah, P; Fata, L; Roosta, M; Peixoto, MM; Nobre, P                                         | 2015 |
| 374 | Sexuality and sexual preferences in adolescents and young adults. First results of the German Sex Survey                                                                     | Zimmermann, I                                                                                                    | 2015 |
| 375 | Treatment of Provoked Vulvodynia in a Swedish cohort using desensitization exercises and cognitive behavioral therapy                                                        | Lindström, S; Kvist, LJ                                                                                          | 2015 |
| 376 | Sexual function in adult patients with classic bladder exstrophy: A multicenter study                                                                                        | Park, W; Zwink, N; Rösch, WH; Schmiedeke, E; Stein, R; Schmidt, D; Noeker, M; Jenetzky, E; Reutter, H; Ebert, AK | 2015 |
| 377 | Treatment of Provoked Vulvodynia in a Swedish cohort using desensitization exercises and cognitive behavioral therapy.                                                       | Lindström, Suzanne;Kvist, Linda J                                                                                | 2015 |
| 378 | Sexual Dysfunctional Beliefs Questionnaire (SDBQ): Translation and Psychometric Properties of the Iranian Version.                                                           | Abdolmanafi, Atefe;Azadfallah, Parviz;Fata, Ladan;Roosta, Mohsen;Peixoto, Maria Manuela;Nobre, Pedro             | 2015 |
| 379 | Sexual dysfunctional beliefs questionnaire (SDBQ): Translation and psychometric properties of the Iranian version                                                            | Abdolmanafi, Atefe;Azadfallah, Parviz;Fata, Ladan;Roosta, Mohsen;Peixoto, Maria Manuela;Nobre, Pedro             | 2015 |
| 380 | Anatomy of sex: Revision of the new anatomical terms used for the clitoris and the female orgasm by sexologists.                                                             | Puppo, Vincenzo;Puppo, Giulia                                                                                    | 2015 |
| 381 | Anatomy of sex: Revision of the new anatomical terms used for the clitoris and the female orgasm by sexologists                                                              | Puppo, Vincenzo;Puppo, Giulia                                                                                    | 2015 |
| 382 | Sexual satisfaction, sexual compatibility, and relationship adjustment in couples: The role of sexual behaviors, orgasm, and men's discernment of women's intercourse orgasm | Klapilová, Kateřina;Brody, Stuart;Krejčová, Lucie;Husárová, Barbara;Binter, Jakub                                | 2015 |

|     |                                                                                                                                                                               |                                                                                                                     |      |
|-----|-------------------------------------------------------------------------------------------------------------------------------------------------------------------------------|---------------------------------------------------------------------------------------------------------------------|------|
| 383 | Sexual satisfaction, sexual compatibility, and relationship adjustment in couples: the role of sexual behaviors, orgasm, and men's discernment of women's intercourse orgasm. | Klapilová, Kateřina;Brody, Stuart;Krejčová, Lucie;Husárová, Barbara;Binter, Jakub                                   | 2015 |
| 384 | Relationships and sexual expression in later life: a biopsychosocial perspective                                                                                              | DeLamater, John;Koepsel, Erica                                                                                      | 2015 |
| 385 | Treatment of Provoked Vulvodynia in a Swedish cohort using desensitization exercises and cognitive behavioral therapy                                                         | Lindstrom, Suzanne;Kvist, Linda J                                                                                   | 2015 |
| 386 | Alternative Sexualformen und Beziehungsqualität – Eine online-gestützte empirische Studie                                                                                     | Zimmermann, Ingo;Gossen, Anastasia                                                                                  | 2015 |
| 387 | Relationships and sexual expression in later life: A biopsychosocial perspective                                                                                              | DeLamater, John;Koepsel, Erica                                                                                      | 2015 |
| 388 | Sexual function in adult patients with classic bladder exstrophy: A multicenter study                                                                                         | Park W.; Zwink N.; Rösch W.H.; Schmiedeke E.; Stein R.; Schmidt D.; Noeker M.; Jenetzky E.; Reutter H.; Ebert A.-K. | 2015 |
| 389 | The man whose fetish object is ejaculate: A case report                                                                                                                       | Taktak Ş.; Karakuş M.; Eke S.M.                                                                                     | 2015 |
| 390 | The potential role of mindfulness in protecting against sexual insecurities                                                                                                   | Dunkley C.R.; Goldsmith K.M.; Gorzalka B.B.                                                                         | 2015 |
| 391 | Treatment of Provoked Vulvodynia in a Swedish cohort using desensitization exercises and cognitive behavioral therapy                                                         | Lindström S.; Kvist L.J.                                                                                            | 2015 |
| 392 | Sexual satisfaction, sexual compatibility, and relationship adjustment in couples: The role of sexual behaviors, orgasm, and men's discernment of women's intercourse orgasm  | Klapilová K.; Brody S.; Krejčová L.; Husárová B.; Binter J.                                                         | 2015 |
| 393 | A new treatment for premature ejaculation? Case series for a desensitizing masturbation aid                                                                                   | Rodríguez J.E.; López A.                                                                                            | 2015 |
| 394 | The existing therapeutic interventions for orgasmic disorders: Recommendations for culturally competent services, narrative review                                            | Salmani Z.; Zargham-Boroujeni A.; Salehi M.; Killeen T.K.; Merghati-Khoei E.                                        | 2015 |
| 395 | Relationships and sexual expression in later life: a biopsychosocial perspective                                                                                              | DeLamater J.; Koepsel E.                                                                                            | 2015 |

|     |                                                                                                                                                                                                        |                                                                                                  |      |
|-----|--------------------------------------------------------------------------------------------------------------------------------------------------------------------------------------------------------|--------------------------------------------------------------------------------------------------|------|
| 396 | Sexual Dysfunctional Beliefs Questionnaire (SDBQ): Translation and Psychometric Properties of the Iranian Version                                                                                      | Abdolmanafi A.; Azadfallah P.; Fata L.; Roosta M.; Peixoto M.M.; Nobre P.                        | 2015 |
| 397 | Masturbation and orgasm as migraine headache treatment: Report of a case                                                                                                                               | Uca A.U.; Kozak H.H.                                                                             | 2015 |
| 398 | Removal of Numerous Vesical Magnetic Beads with a Self-Made Magnetic Sheath                                                                                                                            | Zeng S.-X.; Li H.-Z.; Zhang Z.-S.; Lu X.; Yu X.-W.; Yang Q.-S.; Ma C.; Xu C.-L.; Sun Y.-H.       | 2015 |
| 399 | Sexual Functioning and Behavior of Men with Body Dysmorphic Disorder Concerning Penis Size Compared with Men Anxious about Penis Size and with Controls: A Cohort Study                                | Veale D.; Miles S.; Read J.; Troglia A.; Wylie K.; Muir G.                                       | 2015 |
| 400 | Sex in Its Daily Relational Context                                                                                                                                                                    | Dewitte M.; Van Lankveld J.; Vandenberghe S.; Loeys T.                                           | 2015 |
| 401 | Coming to power: women's fake orgasms and best orgasm experiences illuminate the failures of (hetero) sex and the pleasures of connection                                                              | Fahs, B                                                                                          | 2014 |
| 402 | Personal factors that contribute to or impair women's ability to achieve orgasm                                                                                                                        | de Lucena, BB; Abdo, CHN                                                                         | 2014 |
| 403 | Accuracy of 30-Day Recall for Components of Sexual Function and the Moderating Effects of Gender and Mood                                                                                              | Weinfurt, KP; Lin, L; Dombeck, CB; Broderick, JE; Snyder, DC; Williams, MS; Fawzy, MR; Flynn, KE | 2014 |
| 404 | The Impact of Urinary Incontinence on Sexual Function and Sexual Satisfaction in Women with Spinal Cord Injury                                                                                         | Cramp, J; Courtois, F; Connolly, M; Cosby, J; Ditor, D                                           | 2014 |
| 405 | Trajectories of intimate partnerships, sexual attitudes, desire and satisfaction                                                                                                                       | Ammar, N; Gauthier, JA; Widmer, ED                                                               | 2014 |
| 406 | Women's Masturbation: Experiences of Sexual Empowerment in a Primarily Sex-Positive Sample                                                                                                             | Bowman, CP                                                                                       | 2014 |
| 407 | Overall satisfaction, sexual function, and the durability of neophallus dimensions following staged female to male genital gender confirming surgery: the Institute of Urology, London U.K. experience | Garcia, MM; Christopher, NA; De Luca, F; Spilotros, M; Ralph, DJ                                 | 2014 |

|     |                                                                                                                                                                                                         |                                                                                                                                         |      |
|-----|---------------------------------------------------------------------------------------------------------------------------------------------------------------------------------------------------------|-----------------------------------------------------------------------------------------------------------------------------------------|------|
| 408 | Coming to power: women's fake orgasms and best orgasm experiences illuminate the failures of (hetero)sex and the pleasures of connection                                                                | Fahs, Breanne                                                                                                                           | 2014 |
| 409 | Personal factors that contribute to or impair women's ability to achieve orgasm                                                                                                                         | de Lucena B B;Abdo C H N                                                                                                                | 2014 |
| 410 | Coming to power: Women's fake orgasms and best orgasm experiences illuminate the failures of (hetero)sex and the pleasures of connection                                                                | Fahs, Breanne                                                                                                                           | 2014 |
| 411 | Women's masturbation: Experiences of sexual empowerment in a primarily sex-positive sample                                                                                                              | Bowman, Christin P.                                                                                                                     | 2014 |
| 412 | Personal factors that contribute to or impair women's ability to achieve orgasm.                                                                                                                        | de Lucena, B B;Abdo, C H N                                                                                                              | 2014 |
| 413 | Personal factors that contribute to or impair women's ability to achieve orgasm                                                                                                                         | De Lucena, B B;Abdo, C H N                                                                                                              | 2014 |
| 414 | Coming to power: women's fake orgasms and best orgasm experiences illuminate the failures of (hetero)sex and the pleasures of connection                                                                | Fahs, Breanne                                                                                                                           | 2014 |
| 415 | Coming to power: women's fake orgasms and best orgasm experiences illuminate the failures of (hetero)sex and the pleasures of connection                                                                | Fahs, Breanne                                                                                                                           | 2014 |
| 416 | Overall satisfaction, sexual function, and the durability of neophallus dimensions following staged female to male genital gender confirming surgery: the Institute of Urology, London U.K. experience. | Garcia, Maurice M;Christopher, Nim A;De Luca, Francesco;Spilotros, Marco;Ralph, David J                                                 | 2014 |
| 417 | Accuracy of 30-day recall for components of sexual function and the moderating effects of gender and mood                                                                                               | Weinfurt, Kevin P.;Lin, Li;Dombeck, Carrie B.;Broderick, Joan E.;Snyder, Denise C.;Williams, Megan S.;Fawzy, Maria R.;Flynn, Kathryn E. | 2014 |

|     |                                                                                                                                                                                                                  |                                                                                                                                                                                                                                                                 |      |
|-----|------------------------------------------------------------------------------------------------------------------------------------------------------------------------------------------------------------------|-----------------------------------------------------------------------------------------------------------------------------------------------------------------------------------------------------------------------------------------------------------------|------|
| 418 | Accuracy of 30-day recall for components of sexual function and the moderating effects of gender and mood.                                                                                                       | Weinfurt, Kevin P;Lin, Li;Dombeck, Carrie B;Broderick, Joan E;Snyder, Denise C;Williams, Megan S;Fawzy, Maria R;Flynn, Kathryn E                                                                                                                                | 2014 |
| 419 | Coming to power: women's fake orgasms and best orgasm experiences illuminate the failures of (hetero)sex and the pleasures of connection.                                                                        | Fahs, Breanne                                                                                                                                                                                                                                                   | 2014 |
| 420 | Penile strangulation due to plastic bottle neck: A surgical emergency                                                                                                                                            | Agarwal A.A.; Singh K.R.; Kushwaha J.K.; Sonkar A.A.                                                                                                                                                                                                            | 2014 |
| 421 | The Impact of Vulvar Lichen Sclerosus on Sexual Dysfunction                                                                                                                                                      | Haefner H.K.; Aldrich N.Z.; Dalton V.K.; Gagné H.M.; Marcus S.B.; Patel D.A.; Berger M.B.                                                                                                                                                                       | 2014 |
| 422 | The role of clitoral anatomy in female to male sex reassignment surgery                                                                                                                                          | Vukadinovic V.; Stojanovic B.; Majstorovic M.; Milosevic A.                                                                                                                                                                                                     | 2014 |
| 423 | Coming to power: women's fake orgasms and best orgasm experiences illuminate the failures of (hetero)sex and the pleasures of connection                                                                         | Fahs B.                                                                                                                                                                                                                                                         | 2014 |
| 424 | An evidence-based unified definition of lifelong and acquired premature ejaculation: Report of the second international society for sexual medicine Ad Hoc committee for the definition of premature ejaculation | Serefoglu E.C.; McMahon C.G.; Waldinger M.D.; Althof S.E.; Shindel A.; Adaikan G.; Becher E.F.; Dean J.; Giuliano F.; Hellstrom W.J.G.; Giraldo A.; Glina S.; Incrocci L.; Jannini E.; McCabe M.; Parish S.; Rowland D.; Segraves R.T.; Sharlip I.; Torres L.O. | 2014 |
| 425 | Women's masturbation: Experiences of sexual empowerment in a primarily sex-positive sample                                                                                                                       | Bowman C.P.                                                                                                                                                                                                                                                     | 2014 |
| 426 | Overall satisfaction, sexual function, and the durability of neophallus dimensions following staged female to male genital gender confirming surgery: The Institute of Urology, London U.K. experience           | Garcia M.M.; Christopher N.A.; De Luca F.; Spilotros M.; Ralph D.J.                                                                                                                                                                                             | 2014 |
| 427 | Personal factors that contribute to or impair women's ability to achieve orgasm                                                                                                                                  | De Lucena B.B.; Abdo C.H.N.                                                                                                                                                                                                                                     | 2014 |

|     |                                                                                                                                        |                                                                                                                 |      |
|-----|----------------------------------------------------------------------------------------------------------------------------------------|-----------------------------------------------------------------------------------------------------------------|------|
| 428 | Chapter 8 Sexuality and Menopause                                                                                                      |                                                                                                                 | 2014 |
| 429 | Accuracy of 30-Day Recall for Components of Sexual Function and the Moderating Effects of Gender and Mood                              | Weinfurt K.P.; Lin L.; Dombeck C.B.; Broderick J.E.; Snyder D.C.; Williams M.S.; Fawzy M.R.; Flynn K.E.         | 2014 |
| 430 | Pleasure: Neurobiological conception and Freudian conception; [Le plaisir: conception neurobiologique et conception freudienne]        | Chenu A.; Tassin J.-P.                                                                                          | 2014 |
| 431 | Female sexual function and the clitoral complex using pelvic MRI assessment                                                            | Vaccaro C.M.; Fellner A.N.; Pauls R.N.                                                                          | 2014 |
| 432 | Relationship Satisfaction as a Predictor of Treatment Response During Cognitive Behavioral Sex Therapy                                 | Stephenson, KR; Rellini, AH; Meston, CM                                                                         | 2013 |
| 433 | TESTOSTERONIC GADGETS: THE 'NEW' TECHNOLOGY OF ORGASM APPLIED TO SEX TOYS                                                              | Freire, SP                                                                                                      | 2013 |
| 434 | The Quality of Sexual Experience in Women Correlates with Post-Orgasmic Prolactin Surges: Results from an Experimental Prototype Study | Leeners, B; Kruger, THC; Brody, S; Schmidlin, S; Naegeli, E; Egli, M                                            | 2013 |
| 435 | FACTORS EFFECTING SEXUAL RESPONSE AND SEXUAL SATISFACTION AMONG ELDERLY PERSONS IN BANGKOK, THAILAND                                   | Permpool, P; Yamarat, K; Areesantichai, C                                                                       | 2013 |
| 436 | Sexual well-being of a community sample of high-functioning adults on the autism spectrum who have been in a romantic relationship     | Byers, ES; Nichols, S; Voyer, SD; Reilly, G                                                                     | 2013 |
| 437 | Parents' Attitudes on Sexual Education - What and When?                                                                                | Jankovic, S; Malatestinic, G; Striehl, HB                                                                       | 2013 |
| 438 | Sister-Sister Incest: Data from an Anonymous Computerized Survey                                                                       | Stroebe, SS; O'Keefe, SL; Griffie, K; Kuo, SY; Beard, KW; Kommor, MJ                                            | 2013 |
| 439 | Alexithymia, Negative Emotions, and Sexual Behavior in Heterosexual University Students from Italy                                     | Scimeca, G; Bruno, A; Pandolfo, G; Micò, U; Romeo, VM; Abenavoli, E; Schimmenti, A; Zoccali, R; Muscatello, MRA | 2013 |
| 440 | ARSH 3: Reproductive and Sexual Health Knowledge: A Comparison Among Married Male and Female Young Adults (15-24 y)                    | Nair, MKC; Thankachi, Y; Leena, ML; George, B; Russell, PSS                                                     | 2013 |

|     |                                                                                                                                     |                                                                                                                        |      |
|-----|-------------------------------------------------------------------------------------------------------------------------------------|------------------------------------------------------------------------------------------------------------------------|------|
| 441 | Sexual traumatic events and neurotic disorders picture - sexuality-related and sexuality-unrelated symptoms                         | Sobanski, JA; Klasa, K; Müldner-Nieckowski, L; Dembinska, E; Rutkowski, K; Cyranka, K                                  | 2013 |
| 442 | Immature psychological defense mechanisms are associated with women's greater desire for and actual engaging in masturbation        | Brody, Stuart;Nicholson, Susan                                                                                         | 2013 |
| 443 | Immature psychological defense mechanisms are associated with women's greater desire for and actual engaging in masturbation        | Brody, Stuart;Nicholson, Susan                                                                                         | 2013 |
| 444 | Immature psychological defense mechanisms are associated with women's greater desire for and actual engaging in masturbation        | Brody, Stuart;Nicholson, Susan                                                                                         | 2013 |
| 445 | ARSH 3: Reproductive and sexual health knowledge: a comparison among married male and female young adults (15-24 y).                | Nair, M K C;Thankachi, Yamini;Leena, M L;George, Babu;Russell, Paul Swamidhas Sudhakar                                 | 2013 |
| 446 | Sexual Well-Being of a Community Sample of High-Functioning Adults on the Autism Spectrum Who Have Been in a Romantic Relationship  | Byers, E. Sandra;Nichols, Shana;Voyer, Susan D.;Reilly, Georgianna                                                     | 2013 |
| 447 | Sexual well-being of a community sample of high-functioning adults on the autism spectrum who have been in a romantic relationship  | Byers, E. Sandra;Nichols, Shana;Voyer, Susan D.;Reilly, Georgianna                                                     | 2013 |
| 448 | Sexual well-being of a community sample of high-functioning adults on the Autism spectrum who have been in a romantic relationship  | Byers, E Sandra;Nichols, Shana;Voyer, Susan D;Reilly, Georgianna                                                       | 2013 |
| 449 | Psychosexual needs and sexual behaviors of nursing care home residents                                                              | Mroczek, Bożena;Kurpas, Donata;Gronowska, Małgorzata;Kotwas, Artur;Karakiewicz, Beata                                  | 2013 |
| 450 | Sexual well-being of a community sample of high-functioning adults on the autism spectrum who have been in a romantic relationship. | Byers, E Sandra;Nichols, Shana;Voyer, Susan D;Reilly, Georgianna                                                       | 2013 |
| 451 | [Sexual traumatic events and neurotic disorders picture--sexuality-related and sexuality-unrelated symptoms].                       | Sobański, Jerzy A;Klasa, Katarzyna;Müldner-Nieckowski, Łukasz;Dembińska, Edyta;Rutkowski, Krzysztof;Cyranka, Katarzyna | 2013 |

|     |                                                                                                                                             |                                                                                                                                                                       |      |
|-----|---------------------------------------------------------------------------------------------------------------------------------------------|-----------------------------------------------------------------------------------------------------------------------------------------------------------------------|------|
| 452 | Parents' attitudes on sexual education--what and when?                                                                                      | Janković, Suzana;Malatestinić, Giulia;Striehl, Henrietta Bencević                                                                                                     | 2013 |
| 453 | TESTOSTERONIC GADGETS: THE 'NEW' TECHNOLOGY OF ORGASM APPLIED TO SEX TOYS                                                                   | Perez Freire, Silvia                                                                                                                                                  | 2013 |
| 454 | Sexual traumatic events and neurotic disorders picture—Sexuality-related and sexuality-unrelated symptoms                                   | Sobański, Jerzy A.;Klasa, Katarzyna;Müldner-Nieckowski, Łukasz;Dembińska, Edyta;Rutkowski, Krzysztof;Cyranka, Katarzyna                                               | 2013 |
| 455 | The impact of brief exposure to sexually explicit video clips on partnered female clitoral self-stimulation, orgasm and sexual satisfaction | Kohut, Taylor;Fisher, William A                                                                                                                                       | 2013 |
| 456 | The impact of brief exposure to sexually explicit video clips on partnered female clitoral self-stimulation, orgasm and sexual satisfaction | Kohut, Taylor;Fisher, William A                                                                                                                                       | 2013 |
| 457 | The impact of brief exposure to sexually explicit video clips on partnered female clitoral self-stimulation, orgasm and sexual satisfaction | Kohut, Taylor;Fisher, William A.                                                                                                                                      | 2013 |
| 458 | The impact of brief exposure to sexually explicit video clips on partnered female clitoral self-stimulation, orgasm and sexual satisfaction | Kohut, Taylor;Fisher, William A                                                                                                                                       | 2013 |
| 459 | Parents' attitudes on sexual education - what and when?                                                                                     | Jankovic, S;Malatestinic, G;Striehl, H Bencevic                                                                                                                       | 2013 |
| 460 | Alexithymia, Negative Emotions, and Sexual Behavior in Heterosexual University Students from Italy                                          | Scimeca, Giuseppe;Bruno, Antonio;Pandolfo, Gianluca;Mico, Umberto;Romeo, Vincenzo M;Abenavoli, Elisabetta;Schimmenti, Adriano;Zoccali, Rocco;Muscatello, Maria R A    | 2013 |
| 461 | Alexithymia, negative emotions, and sexual behavior in heterosexual university students from Italy                                          | Scimeca, Giuseppe;Bruno, Antonio;Pandolfo, Gianluca;Micò, Umberto;Romeo, Vincenzo M.;Abenavoli, Elisabetta;Schimmenti, Adriano;Zoccali, Rocco;Muscatello, Maria R. A. | 2013 |



|     |                                                                                                                                             |                                                                                                                                                                             |      |
|-----|---------------------------------------------------------------------------------------------------------------------------------------------|-----------------------------------------------------------------------------------------------------------------------------------------------------------------------------|------|
| 462 | Alexithymia, Negative Emotions, and Sexual Behavior in Heterosexual University Students from Italy                                          | Scimeca, Giuseppe; Bruno, Antonio; Pandolfo, Gianluca; Micò, Umberto; Romeo, Vincenzo M; Abenavoli, Elisabetta; Schimmenti, Adriano; Zoccali, Rocco; Muscatello, Maria R; A | 2013 |
| 463 | Alexithymia, negative emotions, and sexual behavior in heterosexual university students from Italy.                                         | Scimeca, Giuseppe; Bruno, Antonio; Pandolfo, Gianluca; Micò, Umberto; Romeo, Vincenzo M; Abenavoli, Elisabetta; Schimmenti, Adriano; Zoccali, Rocco; Muscatello, Maria R A  | 2013 |
| 464 | Psychosexual needs and sexual behaviors of nursing care home residents                                                                      | Mroczek B.; Kurpas D.; Gronowska M.; Kotwas A.; Karakiewicz B.                                                                                                              | 2013 |
| 465 | ARSH 3: Reproductive and sexual health knowledge: a comparison among married male and female young adults (15-24 y).                        | Nair M.K.; Thankachi Y.; Leena M.L.; George B.; Russell P.S.                                                                                                                | 2013 |
| 466 | Knowledge and attitude on sex among medical students of a Malaysian university: A comparison study                                          | Sidi H.; Loh S.F.; Mahadevan R.; Puteh S.E.W.; Musa R.; Wong C.Y.; Hadi A.A.A.; Sa'aid S.H.; Amali Z.; Abidin M.; Das S.; Saharom M.H.; Zakaria H.                          | 2013 |
| 467 | Increased sexual health after restored genital sensation in male patients with spina bifida or a spinal cord injury: The TOMAX procedure    | Overgoor M.L.E.; De Jong T.P.V.M.; Cohen-Kettenis P.T.; Edens M.A.; Kon M.                                                                                                  | 2013 |
| 468 | The impact of brief exposure to sexually explicit video clips on partnered female clitoral self-stimulation, orgasm and sexual satisfaction | Kohut T.; Fisher W.A.                                                                                                                                                       | 2013 |
| 469 | On the essence of sexuality                                                                                                                 | Klockars L.                                                                                                                                                                 | 2013 |
| 470 | Immature psychological defense mechanisms are associated with women's greater desire for and actual engaging in masturbation                | Brody S.; Nicholson S.                                                                                                                                                      | 2013 |
| 471 | A masculine look at pornography - From fantasy to reality; [Point de vue masculin sur la pornographie : Des fantasmes à la réalité]         | Lajeunesse S.-L.; Deslauriers J.-M.                                                                                                                                         | 2013 |

|     |                                                                                                                                                                                                                           |                                                                                                                    |      |
|-----|---------------------------------------------------------------------------------------------------------------------------------------------------------------------------------------------------------------------------|--------------------------------------------------------------------------------------------------------------------|------|
| 472 | Alexithymia, negative emotions, and sexual behavior in heterosexual university students from Italy                                                                                                                        | Scimeca G.; Bruno A.; Pandolfo G.; Micò U.; Romeo V.M.; Abenavoli E.; Schimmenti A.; Zoccali R.; Muscatello M.R.A. | 2013 |
| 473 | Sexual well-being of a community sample of high-functioning adults on the autism spectrum who have been in a romantic relationship                                                                                        | Byers E.S.; Nichols S.; Voyer S.D.; Reilly G.                                                                      | 2013 |
| 474 | Women's sexuality: From aging to social representations                                                                                                                                                                   | Ringa V.; Diter K.; Laborde C.; Bajos N.                                                                           | 2013 |
| 475 | Sister-sister incest: Data from an anonymous computerized survey                                                                                                                                                          | Stroebe S.S.; O'Keefe S.L.; Griffie K.; Kuo S.-Y.; Beard K.W.; Kommor M.J.                                         | 2013 |
| 476 | Perceived Effects of Sexually Explicit Media among Men Who Have Sex with Men and Psychometric Properties of the Pornography Consumption Effects Scale (PCES)                                                              | Hald G.M.; Smolenski D.; Rosser B.R.S.                                                                             | 2013 |
| 477 | Standard Operating Procedures in the Disorders of Orgasm and Ejaculation                                                                                                                                                  | McMahon C.G.; Jannini E.; Waldinger M.; Rowland D.                                                                 | 2013 |
| 478 | Sexual traumatic events and neurotic disorders picture - Sexuality-related and sexuality-unrelated symptoms; [Seksualne wydarzenia urazowe a obraz zaburzeń nerwicowych - Objawy związane i nie związane z seksualnością] | Sobański J.A.; Klasa K.; Müldner-Nieckowski Ł.; Dembińska E.; Rutkowski K.; Cyranka K.                             | 2013 |
| 479 | Parents' attitudes on sexual education - What and when?; [Stavovi roditelja o spolnom odgoju - Što i kada]                                                                                                                | Janković S.; Malatestinić G.; Striehl H.B.                                                                         | 2013 |
| 480 | Medical students' sexuality - development and fulfilment of sexual needs                                                                                                                                                  | Müldner-Nieckowski, L; Klasa, K; Sobanski, JA; Rutkowski, K; Dembinska, E                                          | 2012 |
| 481 | Sexual Infidelity in China: Prevalence and Gender-Specific Correlates                                                                                                                                                     | Zhang, N; Parish, WL; Huang, YY; Pan, SM                                                                           | 2012 |
| 482 | SEXUAL DYSFUNCTION IN OBSESSIVE COMPULSIVE DISORDER AND PANIC DISORDER                                                                                                                                                    | Aksoy, UM; Aksoy, SG; Maner, F; Gokalp, P; Yanik, M                                                                | 2012 |
| 483 | Sexual dysfunction in obsessive compulsive disorder and panic disorder.                                                                                                                                                   | Aksoy, Umut Mert; Aksoy, Sennur G; Maner, Fulya; Gokalp, Peykan; Yanik, Medaim                                     | 2012 |

|     |                                                                                                                                                                                                                                                                                            |                                                                                                        |      |
|-----|--------------------------------------------------------------------------------------------------------------------------------------------------------------------------------------------------------------------------------------------------------------------------------------------|--------------------------------------------------------------------------------------------------------|------|
| 484 | Sexual Infidelity in China: Prevalence and Gender-Specific Correlates                                                                                                                                                                                                                      | Zhang, Na;Parish, William L;Huang, Yingying;Pan, Suiming                                               | 2012 |
| 485 | Sexual infidelity in china: Prevalence and gender-specific correlates                                                                                                                                                                                                                      | Zhang, Na;Parish, William L.;Huang, Yingying;Pan, Suiming                                              | 2012 |
| 486 | Sexual infidelity in China: prevalence and gender-specific correlates.                                                                                                                                                                                                                     | Zhang, Na;Parish, William L;Huang, Yingying;Pan, Suiming                                               | 2012 |
| 487 | Sexual Infidelity in China: Prevalence and Gender-Specific Correlates                                                                                                                                                                                                                      | Zhang, Na;Parish, William L;Huang, Yingying;Pan, Suiming                                               | 2012 |
| 488 | Sexual satisfaction, relationship satisfaction, and health are associated with greater frequency of penile–vaginal intercourse                                                                                                                                                             | Costa, Rui Miguel;Brody, Stuart                                                                        | 2012 |
| 489 | Seksualność studentów medycyny – Rozwój i realizacja potrzeb seksualnych                                                                                                                                                                                                                   | Müldner-Nieckowski, Łukasz;Klasa, Katarzyna;Sobański, Jerzy A.;Rutkowski, Krzysztof;Dembińska, Edyta   | 2012 |
| 490 | Sexual dysfunction in obsessive compulsive disorder and panic disorder                                                                                                                                                                                                                     | Aksoy, Umut Mert;Aksoy, Şennur G.;Maner, Fulya;Gokalp, Peykan;Yanik, Medaim                            | 2012 |
| 491 | [Medical students' sexuality--development and fulfilment of sexual needs].                                                                                                                                                                                                                 | Müldner-Nieckowski, Łukasz;Klasa, Katarzyna;Sobański, Jerzy A;Rutkowski, Krzysztof;Dembińska, Edyta    | 2012 |
| 492 | Female Sexual Health Consensus Clinical Guidelines                                                                                                                                                                                                                                         | Lamont J.; Bajzak K.; Bouchard C.; Burnett M.; Byers S.; Cohen T.; Fisher W.; Holzapfel S.; Senikas V. | 2012 |
| 493 | Sexual behavior, body image, and partnership in chronic illness: A comparison of huntington's disease and multiple sclerosis                                                                                                                                                               | Reininghaus E.; Reininghaus B.; Fitz W.; Hecht K.; Bonelli R.M.                                        | 2012 |
| 494 | Female Sexual Health Consensus Clinical Guidelines                                                                                                                                                                                                                                         | Lamont J.; Bajzak K.; Bouchard C.; Burnett M.; Byers S.; Cohen T.; Fisher W.; Holzapfel S.; Senikas V. | 2012 |
| 495 | Efficacy of Psychosocial Interventions in Men and Women with Sexual Dysfunctions-A Systematic Review of Controlled Clinical Trials: Part 1-The efficacy of psychosocial interventions for male sexual dysfunction Berner and Günzler Psychosocial Interventions in Male Sexual Dysfunction | Berner M.; Günzler C.                                                                                  | 2012 |

|     |                                                                                                                                                                                                                                                                                                |                                                                            |      |
|-----|------------------------------------------------------------------------------------------------------------------------------------------------------------------------------------------------------------------------------------------------------------------------------------------------|----------------------------------------------------------------------------|------|
| 496 | Sexual infidelity in China: Prevalence and gender-specific correlates                                                                                                                                                                                                                          | Zhang N.; Parish W.L.; Huang Y.; Pan S.                                    | 2012 |
| 497 | Medical students' sexuality - Development and fulfilment of sexual needs; [Seksualność studentów medycyny - Rozwój i realizacja potrzeb seksualnych]                                                                                                                                           | Müldner-Nieckowski Ł.; Klasa K.; Sobański J.A.; Rutkowski K.; Dembińska E. | 2012 |
| 498 | Sexual dysfunction in obsessive compulsive disorder and panic disorder                                                                                                                                                                                                                         | Aksoy U.M.; Aksoy S.G.; Maner F.; Gokalp P.; Yanik M.                      | 2012 |
| 499 | Medical students' sexuality - Beliefs and attitudes; [Seksualność studentów medycyny - Przekonania i postawy]                                                                                                                                                                                  | Müldner-Nieckowski Ł.; Sobański J.A.; Klasa K.; Dembińska E.; Rutkowski K. | 2012 |
| 500 | Transtheoretical Model-based Postpartum Sexual Health Education Program Improves Women's Sexual Behaviors and Sexual Health                                                                                                                                                                    | Lee J.-T.; Tsai J.-L.                                                      | 2012 |
| 501 | The relationship between same-sex sexual experience, sexual distress, and female sexual dysfunction                                                                                                                                                                                            | Burri A.; Rahman Q.; Santtila P.; Jern P.; Spector T.; Sandnabba K.        | 2012 |
| 502 | Efficacy of Psychosocial Interventions in Men and Women With Sexual Dysfunctions-A Systematic Review of Controlled Clinical Trials: Part 2-The Efficacy of Psychosocial Interventions for Female Sexual Dysfunction Günzler and Berner Psychosocial Interventions in Female Sexual Dysfunction | Günzler C.; Berner M.M.                                                    | 2012 |
| 503 | Exploring Women's Postpartum Sexuality: Social, Psychological, Relational, and Birth-Related Contextual Factors                                                                                                                                                                                | Hipp L.E.; Kane Low L.; Van Anders S.M.                                    | 2012 |
| 504 | Simultaneous Penile-Vaginal Intercourse Orgasm is Associated with Satisfaction (Sexual, Life, Partnership, and Mental Health)                                                                                                                                                                  | Brody, S; Weiss, P                                                         | 2011 |
| 505 | Sexual Behavior Predictors of Satisfaction in a Chinese Sample                                                                                                                                                                                                                                 | Tao, P; Brody, S                                                           | 2011 |
| 506 | Sexual media use and relational satisfaction in heterosexual couples                                                                                                                                                                                                                           | Bridges, AJ; Morokoff, PJ                                                  | 2011 |
| 507 | The experiences of men living with inhibited ejaculation                                                                                                                                                                                                                                       | Robbins-Cherry, SA; Hayter, M; Wylie, KR; Goldmeier, D                     | 2011 |

|     |                                                                                      |                                                                                                                                                                                                                                                                |      |
|-----|--------------------------------------------------------------------------------------|----------------------------------------------------------------------------------------------------------------------------------------------------------------------------------------------------------------------------------------------------------------|------|
| 508 | The human female orgasm: critical evaluations of proposed psychological sequelae     | Prause, N                                                                                                                                                                                                                                                      | 2011 |
| 509 | Quality of Life and Sexual Health after Sex Reassignment Surgery in Transsexual Men  | Wierckx, K; Van Caenegem, E; Elaut, E; Dedeker, D; Van de Peer, F; Toye, K; Weyers, S; Hoebeke, P; Monstrey, S; De Cuypere, G; T'Sjoen, G                                                                                                                      | 2011 |
| 510 | Sexual media use and relational satisfaction in heterosexual couples                 | Bridges, Ana J.;Morokoff, Patricia J.                                                                                                                                                                                                                          | 2011 |
| 511 | Quality of life and sexual health after sex reassignment surgery in transsexual men  | Wierckx, Katrien;Van Caenegem, Eva;Elaut, Els;Dedecker, David;Van de Peer, Fleur;Toye, Kaatje;Weyers, Steven;Hoebeke, Piet;Monstrey, Stan;De Cuypere, Griet;T'Sjoen, Guy                                                                                       | 2011 |
| 512 | Quality of life and sexual health after sex reassignment surgery in transsexual men. | Wierckx, Katrien;Van Caenegem, Eva;Elaut, Els;Dedecker, David;Van de Peer, Fleur;Toye, Kaatje;Weyers, Steven;Hoebeke, Piet;Monstrey, Stan;De Cuypere, Griet;T'Sjoen, Guy                                                                                       | 2011 |
| 513 | The experiences of men living with inhibited ejaculation                             | Robbins-Cherry, Sally Ann;Hayter, Mark;Wylie, Kevan Richard;Goldmeier, David                                                                                                                                                                                   | 2011 |
| 514 | The experiences of men living with inhibited ejaculation                             | Robbins-Cherry, Sally Ann;Hayter, Mark;Wylie, Kevan Richard;Goldmeier, David                                                                                                                                                                                   | 2011 |
| 515 | Practices and sexual behaviors of students of the Universidad de Manizales 2010      | Castrillón, Jose Jaime Castaño;Castaño, Jaime;Cañón, Sandra Constanza;Díaz, Sahira Alejandra;Hernandez, Jhony Alexander;Martínez, Yovanny Hoyos;Marín, Felipe López;Arango, Katherina Manchego;Narvaez, Carlos Wilson;Noguera, Verónica;Ortega, Andrea Marisol | 2011 |
| 516 | Sexual behavior predictors of satisfaction in a Chinese sample                       | Tao, Peng;Brody, Stuart                                                                                                                                                                                                                                        | 2011 |
| 517 | Sexual behavior predictors of satisfaction in a Chinese sample.                      | Tao, Peng;Brody, Stuart                                                                                                                                                                                                                                        | 2011 |
| 518 | Frequency of sex in married couples: differences between men and women               | Moral de la Rubia, Jose                                                                                                                                                                                                                                        | 2011 |

|     |                                                                                                                                         |                                                                                                                                           |      |
|-----|-----------------------------------------------------------------------------------------------------------------------------------------|-------------------------------------------------------------------------------------------------------------------------------------------|------|
| 519 | Quality of Life and Sexual Health after Sex Reassignment Surgery in Transsexual Men                                                     | Wierckx K.; Van Caenegem E.; Elaut E.; Dedeker D.; Van de Peer F.; Toye K.; Weyers S.; Hoebeke P.; Monstrey S.; De Cuypere G.; T'Sjoen G. | 2011 |
| 520 | Female anorgasmy as a health problem; [Anorgasmia femenina como problema de salud]                                                      | Bello L.A.F.; Rivero T.S.E.; Alvarez Y.F.                                                                                                 | 2011 |
| 521 | How unusual are the contents of paraphilias? paraphilia-associated sexual arousal patterns in a community-based sample of men           | Ahlers C.J.; Schaefer G.A.; Mundt I.A.; Roll S.; Englert H.; Willich S.N.; Beier K.M.                                                     | 2011 |
| 522 | Primary lifelong delayed ejaculation: Characteristics and response to bupropion                                                         | Abdel-Hamid I.A.; Saleh E.-S.                                                                                                             | 2011 |
| 523 | Sexual media use and relational satisfaction in heterosexual couples                                                                    | Bridges A.J.; Morokoff P.J.                                                                                                               | 2011 |
| 524 | The experiences of men living with inhibited ejaculation                                                                                | Robbins-Cherry S.A.; Hayter M.; Wylie K.R.; Goldmeier D.                                                                                  | 2011 |
| 525 | Sexual Behavior Predictors of Satisfaction in a Chinese Sample                                                                          | Tao P.; Brody S.                                                                                                                          | 2011 |
| 526 | Case Studies                                                                                                                            | Jannini E.A.; Porst H.                                                                                                                    | 2011 |
| 527 | The relationship between sexual functioning and depressive symptomatology in postpartum women: A pilot study                            | Chivers M.L.; Pittini R.; Grigoriadis S.; Villegas L.; Ross L.E.                                                                          | 2011 |
| 528 | Sexuality in women with polycystic ovary syndrome: a pilot study                                                                        | Silva, JSD; da Fonseca, AM; Bagnoli, VR; Cavalcanti, AL; Soares, JM; Baracat, EC                                                          | 2010 |
| 529 | Pornography, Sexual Socialization, and Satisfaction Among Young Men                                                                     | Stulhofer, A; Busko, V; Landripet, I                                                                                                      | 2010 |
| 530 | Influences of Mastery, Spousal Support, and Adaptive Coping on Sexual Drive and Satisfaction Among Chinese Gynecologic Cancer Survivors | Tang, CSK; Lai, BPY; Chung, TKH                                                                                                           | 2010 |
| 531 | Sexuality During Pregnancy                                                                                                              | Pauleta, JR; Pereira, NM; Graça, LM                                                                                                       | 2010 |
| 532 | The International Index of Erectile Function: Development of an Adapted Tool for Use in HIV-Positive Men Who Have Sex with Men          | Coyne, K; Mandalia, S; McCullough, S; Catalan, J; Noestlinger, C; Colebunders, R; Asboe, D                                                | 2010 |

|     |                                                                                                                                          |                                                                                                                                                  |      |
|-----|------------------------------------------------------------------------------------------------------------------------------------------|--------------------------------------------------------------------------------------------------------------------------------------------------|------|
| 533 | Exploring the Impact of Prostate Cancer on Men's Sexual Well-Being                                                                       | Letts, C; Tamlyn, K; Byers, ES                                                                                                                   | 2010 |
| 534 | Sexuality in women with polycystic ovary syndrome: a pilot study.                                                                        | Silva, Jucilene Sales da Paixão;Fonseca, Angela Maggio da;Bagnoli, Vicente Renato;Cavalcanti, Ana Lucia;Soares, José Maria;Baracat, Edmund Chada | 2010 |
| 535 | Influences of mastery, spousal support, and adaptive coping on sexual drive and satisfaction among Chinese gynecologic cancer survivors  | Tang, Catherine So-kum;Lai, Beatrice P. Y.;Chung, Tony K. H.                                                                                     | 2010 |
| 536 | Influences of mastery, spousal support, and adaptive coping on sexual drive and satisfaction among chinese gynecologic cancer survivors. | Tang, Catherine So-Kum;Lai, Beatrice P Y;Chung, Tony K H                                                                                         | 2010 |
| 537 | Influences of Mastery, Spousal Support, and Adaptive Coping on Sexual Drive and Satisfaction Among Chinese Gynecologic Cancer Survivors  | Tang, Catherine So-kum;Lai, Beatrice P; Y;Chung, Tony K; H                                                                                       | 2010 |
| 538 | Exploring the impact of prostate cancer on men's sexual well-being                                                                       | Letts, Cindy;Tamlyn, Karen;Byers, E. Sandra                                                                                                      | 2010 |
| 539 | Exploring the Impact of Prostate Cancer on Men's Sexual Well-Being                                                                       | Letts, Cindy;Tamlyn, Karen;Byers, E Sandra                                                                                                       | 2010 |
| 540 | Exploring the Impact of Prostate Cancer on Men's Sexual Well-Being                                                                       | Letts, Cindy;Tamlyn, Karen;Byers, E Sandra                                                                                                       | 2010 |
| 541 | Pornography, sexual socialization, and satisfaction among young men.                                                                     | Stulhofer, Aleksandar;Busko, Vesna;Landripet, Ivan                                                                                               | 2010 |
| 542 | The International Index of Erectile Function: development of an adapted tool for use in HIV-positive men who have sex with men.          | Coyne, Katherine;Mandalia, Sundhiya;McCullough, Sonya;Catalan, Jose;Noestlinger, Christiana;Colebunders, Robert;Asboe, David                     | 2010 |
| 543 | Pornography, sexual socialization, and satisfaction among young men                                                                      | Štulhofer, Aleksandar;Buško, Vesna;Landripet, Ivan                                                                                               | 2010 |

|     |                                                                                                                                         |                                                                                                                              |      |
|-----|-----------------------------------------------------------------------------------------------------------------------------------------|------------------------------------------------------------------------------------------------------------------------------|------|
| 544 | The International Index of Erectile Function: Development of an adapted tool for use in HIV-positive men who have sex with men          | Coyne, Katherine;Mandalia, Sundhiya;McCullough, Sonya;Catalan, Jose;Noestlinger, Christiana;Colebunders, Robert;Asboe, David | 2010 |
| 545 | Pornography, Sexual Socialization, and Satisfaction Among Young Men                                                                     | Stulhofer, Aleksandar;Busko, Vesna;Landripet, Ivan                                                                           | 2010 |
| 546 | Exploring the impact of prostate cancer on men's sexual well-being.                                                                     | Letts, Cindy;Tamlyn, Karen;Byers, E Sandra                                                                                   | 2010 |
| 547 | Sexuality during pregnancy.                                                                                                             | Pauleta, Joana Rocha;Pereira, Nuno Monteiro;Graça, Luís Mendes                                                               | 2010 |
| 548 | Sexuality during pregnancy                                                                                                              | Pauleta, Joana Rocha;Pereira, Nuno Monteiro;Graça, Luís Mendes                                                               | 2010 |
| 549 | Comparison of female sexual dysfunctions before and during pregnancy                                                                    | Ebrahimian A.; Heydari M.; Saberi Zafarghandi M.B.                                                                           | 2010 |
| 550 | Love among the objectum sexuals                                                                                                         | Marsh A.                                                                                                                     | 2010 |
| 551 | Sexual satisfaction in dementia: Perspectives of patients and spouses                                                                   | Dourado M.; Finamore C.; Barroso M.F.; Santos R.; Laks J.                                                                    | 2010 |
| 552 | Erectile dysfunction and correlated factors in Brazilian men aged 18-40 years                                                           | Martins F.G.; Abdo C.H.N.                                                                                                    | 2010 |
| 553 | Influences of mastery, spousal support, and adaptive coping on sexual drive and satisfaction among chinese gynecologic cancer survivors | Tang C.S.-K.; Lai B.P.Y.; Chung T.K.H.                                                                                       | 2010 |
| 554 | The development of a sensory substitution system for the sexual rehabilitation of men with chronic spinal cord injury                   | Borisoff J.F.; Elliott S.L.; Hocaloski S.; Birch G.E.                                                                        | 2010 |
| 555 | Is infertility a risk factor for female sexual dysfunction? A case-control study                                                        | Millheiser L.S.; Helmer A.E.; Quintero R.B.; Westphal L.M.; Milki A.A.; Lathi R.B.                                           | 2010 |
| 556 | Pornography, sexual socialization, and satisfaction among young men                                                                     | Štulhofer A.; Buško V.; Landripet I.                                                                                         | 2010 |



|     |                                                                                                                                                                                                                                                                                                                                                                                                                                                                                                                        |                                                                                               |      |
|-----|------------------------------------------------------------------------------------------------------------------------------------------------------------------------------------------------------------------------------------------------------------------------------------------------------------------------------------------------------------------------------------------------------------------------------------------------------------------------------------------------------------------------|-----------------------------------------------------------------------------------------------|------|
| 557 | Exploring the impact of prostate cancer on men's sexual well-being                                                                                                                                                                                                                                                                                                                                                                                                                                                     | Letts C.; Tamlyn K.; Byers E.S.                                                               | 2010 |
| 558 | Differences in predictors of sexual satisfaction and in sexual satisfaction between female and male university students in Slovenia                                                                                                                                                                                                                                                                                                                                                                                    | Ziherl S.; Masten R.                                                                          | 2010 |
| 559 | Women's vibrator use in sexual partnerships: Results from a nationally representative survey in the United States                                                                                                                                                                                                                                                                                                                                                                                                      | Herbenick D.; Reece M.; Sanders S.A.; Dodge B.; Ghassemi A.; Fortenberry J.D.                 | 2010 |
| 560 | Hypoactive sexual desire disorder: comparison of two questionnaires (the brief profile of female sexual function and the health and female sexual dysfunction in primary care) in women with hysterectomy plus bilateral oophorectomy versus normal women; [Trastorno del deseo sexual hipoactivo: comparación de 2 cuestionarios (breve perfil de la función sexual de la mujer y salud y disfunción sexual femenina en atención primaria) en 2 grupos de mujeres (ovariectomizadas e histerectomizadas, y normales)] | López-Olmos J.                                                                                | 2010 |
| 561 | Sexuality during pregnancy                                                                                                                                                                                                                                                                                                                                                                                                                                                                                             | Pauleta J.R.; Pereira N.M.; Graça L.M.                                                        | 2010 |
| 562 | Expanding the test of counterfeit deviance: Are sexual knowledge, experience and needs a factor in the sexualised challenging behaviour of adults with intellectual disability?                                                                                                                                                                                                                                                                                                                                        | Lockhart K.; Guerin S.; Shanahan S.; Coyle K.                                                 | 2010 |
| 563 | Women's sexual desire and arousal disorders                                                                                                                                                                                                                                                                                                                                                                                                                                                                            | Brotto L.A.; Bitzer J.; Laan E.; Leiblum S.; Luria M.                                         | 2010 |
| 564 | The international index of erectile function: Development of an adapted tool for use in HIV-positive men who have sex with men                                                                                                                                                                                                                                                                                                                                                                                         | Coyne K.; Mandalia S.; McCullough S.; Catalan J.; Noestlinger C.; Colebunders R.; Asboe D.    | 2010 |
| 565 | Psychological and interpersonal dimensions of sexual function and dysfunction                                                                                                                                                                                                                                                                                                                                                                                                                                          | McCabe M.; Althof S.E.; Assalian P.; Chevret-Measson M.; Leiblum S.R.; Simonelli C.; Wylie K. | 2010 |
| 566 | Satisfaction (Sexual, Life, Relationship, and Mental Health) Is Associated Directly with Penile-Vaginal Intercourse, but Inversely with Other Sexual Behavior Frequencies                                                                                                                                                                                                                                                                                                                                              | Brody, S; Costa, RM                                                                           | 2009 |

|     |                                                                                                                                                                            |                                                                                |      |
|-----|----------------------------------------------------------------------------------------------------------------------------------------------------------------------------|--------------------------------------------------------------------------------|------|
| 567 | Determinants of Sexual Satisfaction in a Sample of German Women                                                                                                            | Philippsohn, S; Hartmann, U                                                    | 2009 |
| 568 | Factors Affecting Self-Reported Sexuality in Men with Obstructive Sleep Apnea Syndrome                                                                                     | Stannek, T; Hürny, C; Schoch, OD; Bucher, T; Münzer, T                         | 2009 |
| 569 | Assessment and treatment of sexual dysfunctions in men and women with spinal cord injury                                                                                   | Courtois, F; Charvier, K; Leriche, A; Côté, M; Lemieux, A                      | 2009 |
| 570 | Sexual difficulties for persons with multiple sclerosis in New South Wales, Australia                                                                                      | Redelman, MJ                                                                   | 2009 |
| 571 | Factors affecting self-reported sexuality in men with obstructive sleep apnea syndrome.                                                                                    | Stannek, Tobias;Hürny, Christoph;Schoch, Otto D;Bucher, Thomas;Münzer, Thomas  | 2009 |
| 572 | Factors affecting self-reported sexuality in men with obstructive sleep apnea syndrome                                                                                     | Stannek, Tobias;Hürny, Christoph;Schoch, Otto D.;Bucher, Thomas;Münzer, Thomas | 2009 |
| 573 | Satisfaction (sexual, life, relationship, and mental health) is associated directly with penile-vaginal intercourse, but inversely with other sexual behavior frequencies. | Brody, Stuart;Costa, Rui Miguel                                                | 2009 |
| 574 | Satisfaction (sexual, life, relationship, and mental health) is associated directly with penile-vaginal intercourse, but inversely with other sexual behavior frequencies  | Brody, Stuart;Costa, Rui Miguel                                                | 2009 |
| 575 | Determinants of sexual satisfaction in a sample of German women.                                                                                                           | Philippsohn, Susanne;Hartmann, Uwe                                             | 2009 |
| 576 | Determinants of sexual satisfaction in a sample of German women                                                                                                            | Philippsohn, Susanne;Hartmann, Uwe                                             | 2009 |
| 577 | Premature ejaculation: Bother and intravaginal ejaculatory latency time in Iran                                                                                            | Zargooshi J.                                                                   | 2009 |
| 578 | Sexual functioning in transsexuals following hormone therapy and genital surgery: A review                                                                                 | Klein C.; Gorzalka B.B.                                                        | 2009 |

|     |                                                                                                                                                                                                                              |                                                                                                  |      |
|-----|------------------------------------------------------------------------------------------------------------------------------------------------------------------------------------------------------------------------------|--------------------------------------------------------------------------------------------------|------|
| 579 | Longitudinal changes in sexual functioning as women transition through menopause: Results from the study of women's health across the nation                                                                                 | Avis N.E.; Brockwell S.; Randolph J.F.; Shen S.; Cain V.S.; Ory M.; Greendale G.A.               | 2009 |
| 580 | Sexual difficulties for persons with multiple sclerosis in New South Wales, Australia                                                                                                                                        | Redelman M.J.                                                                                    | 2009 |
| 581 | Factors affecting self-reported sexuality in men with obstructive sleep apnea syndrome                                                                                                                                       | Stannek T.; Hürny C.; Schoch O.D.; Bucher T.; Münzer T.                                          | 2009 |
| 582 | Prevalence and characteristics of vibrator use by men in the United States                                                                                                                                                   | Reece M.; Herbenick D.; Sanders S.A.; Dodge B.; Ghassemi A.; Fortenberry J.D.                    | 2009 |
| 583 | Long-term results of immediate surgical treatment of penile fracture                                                                                                                                                         | Kim M.G.; Yu J.H.; Sung L.H.; Noh C.H.; Chung J.Y.                                               | 2009 |
| 584 | Pilot study of Australian school-based sexual health education: Parents views                                                                                                                                                | MacBeth A.; Weerakoon P.; Sitharthan G.                                                          | 2009 |
| 585 | Satisfaction (sexual, life, relationship, and mental health) Is associated directly with penile-vaginal intercourse, but inversely with other sexual behavior frequencies                                                    | Brody S.; Costa R.M.                                                                             | 2009 |
| 586 | Canadian male sexual health council survey to assess prevalence and treatment of premature ejaculation in Canada                                                                                                             | Brock G.B.; Bénard F.; Casey R.; Elliott S.L.; Gajewski J.B.; Lee J.C.                           | 2009 |
| 587 | Sexual function in women: What is normal?                                                                                                                                                                                    | Domoney C.                                                                                       | 2009 |
| 588 | Determinants of sexual satisfaction in a sample of German women                                                                                                                                                              | Philippsohn S.; Hartmann U.                                                                      | 2009 |
| 589 | Discrepancies between sexual desire and sexual activity: Gender differences and associations with relationship satisfaction                                                                                                  | Santtila, P; Wager, I; Witting, K; Harlaar, N; Jern, P; Johansson, A; Varjonen, M; Sandnabba, NK | 2008 |
| 590 | The effects of citalopram and fluoxetine on sexual behavior in healthy men: Evidence of delayed ejaculation and unaffected sexual desire. A randomized, placebo-controlled, double-blind, double-dummy, parallel group study | Madeo, B; Bettica, P; Milleri, S; Balestrieri, A; Granata, ARM; Carani, C; Rochira, V            | 2008 |

|     |                                                                                                                                                                                                                               |                                                                                                                                     |      |
|-----|-------------------------------------------------------------------------------------------------------------------------------------------------------------------------------------------------------------------------------|-------------------------------------------------------------------------------------------------------------------------------------|------|
| 591 | Empathic sexual responses in heterosexual women and men                                                                                                                                                                       | Haning, R. Vernon;O'Keefe, Stephen L.;Beard, Keith W.;Randall, Elizabeth J.;Kommor, Martin J.;Stroebe, Sandra S.                    | 2008 |
| 592 | Empathic sexual responses in heterosexual women and men                                                                                                                                                                       | Haning, R. Vernon;O'Keefe, Stephen L.;Beard, Keith W.;Randall, Elizabeth J.;Kommor, Martin J.;Stroebe, Sandra S.                    | 2008 |
| 593 | The effects of citalopram and fluoxetine on sexual behavior in healthy men: evidence of delayed ejaculation and unaffected sexual desire. A randomized, placebo-controlled, double-blind, double-dummy, parallel group study. | Madeo, Bruno;Bettica, Paolo;Milleri, Stefano;Balestrieri, Antonio;Granata, Antonio R M;Carani, Cesare;Rochira, Vincenzo             | 2008 |
| 594 | The effects of citalopram and fluoxetine on sexual behavior in healthy men: Evidence of delayed ejaculation and unaffected sexual desire. A randomized, placebo-controlled, double-blind, double-dummy, parallel group study  | Madeo, Bruno;Bettica, Paolo;Milleri, Stefano;Balestrieri, Antonio;Granata, Antonio R. M.;Carani, Cesare;Rochira, Vincenzo           | 2008 |
| 595 | Discrepancies between sexual desire and sexual activity: gender differences and associations with relationship satisfaction.                                                                                                  | Santtila, Pekka;Wager, Ingrid;Witting, Katarina;Harlaar, Nicole;Jern, Patrick;Johansson, Ada;Varjonen, Markus;Sandnabba, N. Kenneth | 2008 |
| 596 | Discrepancies between sexual desire and sexual activity: Gender differences and associations with relationship satisfaction                                                                                                   | Santtila, Pekka;Wager, Ingrid;Witting, Katarina;Harlaar, Nicole;Jern, Patrick;Johansson, Ada;Varjonen, Markus;Sandnabba, N. Kenneth | 2008 |
| 597 | Discrepancies between sexual desire and sexual activity: Gender differences and associations with relationship satisfaction                                                                                                   | Santtila P.; Wager I.; Witting K.; Harlaar N.; Jern P.; Johansson A.; Varjonen M.; Sandnabba N.K.                                   | 2008 |
| 598 | Effectiveness of sildenafil citrate (Viagra™) and tadalafil (Cialis™) on sexual responses in Saudi men with erectile dysfunction in routine clinical practice                                                                 | Ali S.T.                                                                                                                            | 2008 |
| 599 | Clinical holistic medicine: Teaching orgasm for females with chronic anorgasmia using the Betty Dodson method                                                                                                                 | Struck P.; Ventegodt S.                                                                                                             | 2008 |
| 600 | The prevalence and risk factors of female sexual dysfunction in young Korean women: An internet-based survey                                                                                                                  | Song S.H.; Jeon H.; Kim S.W.; Paick J.-S.; Son H.                                                                                   | 2008 |

|     |                                                                                                                                                                                                                              |                                                                                                                                  |      |
|-----|------------------------------------------------------------------------------------------------------------------------------------------------------------------------------------------------------------------------------|----------------------------------------------------------------------------------------------------------------------------------|------|
| 601 | The effects of citalopram and fluoxetine on sexual behavior in healthy men: Evidence of delayed ejaculation and unaffected sexual desire. A randomized, placebo-controlled, double-blind, double-dummy, parallel group study | Madeo B.; Bettica P.; Milleri S.; Balestrieri A.; Granata A.R.M.; Carani C.; Rochira V.                                          | 2008 |
| 602 | Empathic sexual responses in heterosexual women and men                                                                                                                                                                      | Haning R.V.; O'Keefe S.L.; Beard K.W.; Randall E.J.; Kommor M.J.; Stroebe S.S.                                                   | 2008 |
| 603 | The relationship between serial sexual murder and autoerotic asphyxiation                                                                                                                                                    | Myers W.C.; Bukhanovskiy A.; Justen E.; Morton R.J.; Tilley J.; Adams K.; Vandagriff V.L.; Hazelwood R.R.                        | 2008 |
| 604 | Sexual functioning of people with rheumatoid arthritis: a multicenter study                                                                                                                                                  | van Berlo, WTM; van de Wiel, HBM; Taal, E; Rasker, JJ; Schultz, WCMW; van Rijswijk, MH                                           | 2007 |
| 605 | Body Image and Sexual Functioning Among Bisexual Women                                                                                                                                                                       | Zamboni, BD; Robinson, BE; Bockting, WO                                                                                          | 2007 |
| 606 | Masturbation in the United States                                                                                                                                                                                            | Das, A                                                                                                                           | 2007 |
| 607 | Masturbation in the United States.                                                                                                                                                                                           | Das, Aniruddha                                                                                                                   | 2007 |
| 608 | Masturbation in the United States                                                                                                                                                                                            | Das, Aniruddha                                                                                                                   | 2007 |
| 609 | Vaginal orgasm is associated with better psychological function                                                                                                                                                              | Brody, Stuart                                                                                                                    | 2007 |
| 610 | Vaginal orgasm is associated with better psychological function                                                                                                                                                              | Brody, Stuart                                                                                                                    | 2007 |
| 611 | Sexual activity, health and well-being--the beneficial roles of coitus and masturbation                                                                                                                                      | Levin, Roy J.                                                                                                                    | 2007 |
| 612 | Sexual activity, health and well-being - the beneficial roles of coitus and masturbation                                                                                                                                     | Levin, Roy J                                                                                                                     | 2007 |
| 613 | Sexual functioning of people with rheumatoid arthritis: a multicenter study.                                                                                                                                                 | van Berlo, Willy T M;van de Wiel, Harry B M;Taal, Erik;Rasker, Johannes J;Weijmar Schultz, Willibrord C M;van Rijswijk, Martin H | 2007 |
| 614 | Sexual functioning of people with rheumatoid arthritis: a multicenter study                                                                                                                                                  | Willy T M van Berlo;Harry B M van de Wiel;Taal, Erik;Rasker, Johannes J;Willibrord C M Weijmar Schultz;van Rijswijk, Martin H    | 2007 |
| 615 | Body image and sexual functioning among bisexual women                                                                                                                                                                       | Zamboni, Brian D.;Robinson, Beatrice "Bean" E.;Bockting, Walter O.                                                               | 2007 |

|     |                                                                                                                           |                                                                                                       |      |
|-----|---------------------------------------------------------------------------------------------------------------------------|-------------------------------------------------------------------------------------------------------|------|
| 616 | Sexual Behavior in Later Life                                                                                             | DeLamater, J.; Moorman, S.M.                                                                          | 2007 |
| 617 | Sexual functioning of people with rheumatoid arthritis: A multicenter study                                               | van Berlo W.T.M.; van de Wiel H.B.M.; Taal E.; Rasker J.J.; Weijmar Schultz W.C.M.; van Rijswijk M.H. | 2007 |
| 618 | Sex after seventy: A pilot study of sexual function in older persons                                                      | Smith L.J.; Mulhall J.P.; Deveci S.; Monaghan N.; Reid M.C.                                           | 2007 |
| 619 | Masturbation in the United States                                                                                         | Das A.                                                                                                | 2007 |
| 620 | Vaginal orgasm is associated with better psychological function                                                           | Brody S.                                                                                              | 2007 |
| 621 | Premature ejaculation: A new approach by James H. Semans                                                                  | Glina S.Sidney; Abdo C.H.N.; Waldinger M.D.; Althof S.E.; Mc Mahon C.; Salonia A.; Donatucci C.       | 2007 |
| 622 | The racialisation and ethnicisation of sexuality and sexual problems in sex therapeutic discourse                         | Mulholland J.                                                                                         | 2007 |
| 623 | Sexual Function After Three-Dimensional Conformal Radiotherapy for Prostate Cancer: Results From a Dose-Escalation Trial  | van der Wielen G.J.; van Putten W.L.J.; Incrocci L.                                                   | 2007 |
| 624 | Combined brief psychosexual intervention after mastectomy: Effects on sexuality, body image, and psychological well-being | Kalaitzi C.; Papadopoulos V.P.; Michas K.; Vlasits K.; Skandalakis P.; Filippou D.                    | 2007 |
| 625 | French doctors and masturbation before 1945; [Les médecins français et la masturbation avant 1945]                        | Brenot P.                                                                                             | 2007 |
| 626 | Prevalence and correlates of sexual dysfunction among young adult married women in rural China: a population-based study  | Lau, JTF; Cheng, Y; Wang, Q; Yang, X                                                                  | 2006 |
| 627 | Seminal characteristics and sexual behavior in men of different age groups: is there an aging effect?                     | Zavos, PM; Kaskar, K; Correa, JR; Sikka, SC                                                           | 2006 |
| 628 | [Sexuality of pregnant women].                                                                                            | Malarewicz, Andrzej;Szymkiewicz, Jadwiga;Rogala, Jerzy                                                | 2006 |
| 629 | Prevalence and correlates of sexual dysfunction among young adult married women in rural China: a population-based study. | Lau, J T F;Cheng, Y;Wang, Q;Yang, X                                                                   | 2006 |
| 630 | Prevalence and correlates of sexual dysfunction among young adult married women in rural China: a population-based study  | Lau J T F;Cheng, Y;Wang, Q;Yang, X                                                                    | 2006 |

|     |                                                                                                                                                             |                                                                                                        |      |
|-----|-------------------------------------------------------------------------------------------------------------------------------------------------------------|--------------------------------------------------------------------------------------------------------|------|
| 631 | Prevalence and correlates of sexual dysfunction among young adult married women in rural China: a population-based study                                    | Lau, J T F;Cheng, Y;Wang, Q;Yang, X                                                                    | 2006 |
| 632 | Prevalence and correlates of sexual dysfunction among young adult married women in rural China: A population-based study                                    | Lau J.T.F.; Cheng Y.; Wang Q.; Yang X.                                                                 | 2006 |
| 633 | Sexual behaviours among students of the Medical University in Gdańsk; [Formy zachowań seksualnych wśród studentów Akademii Medycznej w Gdańsku]             | Grabowski K.; Wichowicz H.M.; Cubala W.J.                                                              | 2006 |
| 634 | Premature ejaculation                                                                                                                                       | Broderick G.A.                                                                                         | 2006 |
| 635 | The post-orgasmic prolactin increase following intercourse is greater than following masturbation and suggests greater satiety                              | Brody S.; Krüger T.H.C.                                                                                | 2006 |
| 636 | On orgasm, sexual techniques, and erotic perceptions in 18- to 74-year-old Swedish women                                                                    | Fugl-Meyer K.S.; Öberg K.; Lundberg P.O.; Lewin B.; Fugl-Meyer A.                                      | 2006 |
| 637 | Penile - Vaginal intercourse is better: Evidence trumps ideology                                                                                            | Brody S.                                                                                               | 2006 |
| 638 | A double-blind study of citalopram versus placebo in the treatment of compulsive sexual behaviors in gay and bisexual men                                   | Wainberg M.L.; Muench F.; Morgenstern J.; Hollander E.; Irwin T.W.; Parsons J.T.; Allen A.; O'Leary A. | 2006 |
| 639 | Patient-reported complications and functional outcomes of male-to-female sex reassignment surgery                                                           | Lawrence A.A.                                                                                          | 2006 |
| 640 | Sexual function and sexual activities in female schizophrenic patients; [Sexuální funkce a sexuální aktivity pacientek s onemocněním schizofrenního okruhu] | Mansour-Musová H.; Weiss P.                                                                            | 2006 |
| 641 | Body image and Sexual functioning among bisexual women                                                                                                      | Zamboni B.D.; Robinson B.B.E.; Bockting W.O.                                                           | 2006 |
| 642 | A genealogy of the genital kiss: Oral sex in the twentieth century                                                                                          | Hunt A.; Curtis B.                                                                                     | 2006 |
| 643 | Sexual dysfunctions and marital adjustment in veterans with PTSD                                                                                            | Ahmadi K.; Fathi-Ashtiani A.; Zareir A.; Arabnia A.; Amiri M.                                          | 2006 |
| 644 | Prevalence and risk factors of sexual dysfunction among younger married men in a rural area in China                                                        | Lau, JTF; Wang, QS; Cheng, YM; Yang, XL                                                                | 2005 |
| 645 | Persistent sexual arousal syndrome: A descriptive study                                                                                                     | Leiblum, S; Brown, C; Wan, J; Rawlinson, L                                                             | 2005 |

|     |                                                                                                       |                                                                                                                                                    |      |
|-----|-------------------------------------------------------------------------------------------------------|----------------------------------------------------------------------------------------------------------------------------------------------------|------|
| 646 | Clitoral therapy device for treatment of sexual dysfunction in irradiated cervical cancer patients    | Schroder, M; Mell, LK; Hurteau, JA; Collins, YC; Rotmensch, J; Waggoner, SE; Yamada, SD; Small, W; Mundt, AJ                                       | 2005 |
| 647 | Sexual and physical health after sex reassignment surgery                                             | De Cuypere, G; T'Sjoen, G; Beerten, R; Selvaggi, G; De Sutter, P; Hoebeke, P; Monstrey, S; Vansteenwegen, A; Rubens, R                             | 2005 |
| 648 | Sexual and physical health after sex reassignment surgery.                                            | De Cuypere, Griet;T'Sjoen, Guy;Beerten, Ruth;Selvaggi, Gennaro;De Sutter, Petra;Hoebeke, Piet;Monstrey, Stan;Vansteenwegen, Alfons;Rubens, Robert  | 2005 |
| 649 | Sexual and Physical Health After Sex Reassignment Surgery                                             | De Cuypere, Griet;T'Sjoen, Guy;Beerten, Ruth;Selvaggi, Gennaro;De Sutter, Petra;Hoebeke, Piet;Monstrey, Stan;Vansteenwegen, Alfons;Rubens, Robert  | 2005 |
| 650 | Sexual and Physical Health After Sex Reassignment Surgery                                             | De Cuypere Griet;TSjoen Guy;Beerten, Ruth;Selvaggi Gennaro;De Sutter Petra;Hoebeke Piet;Monstrey Stan;Vansteenwegen Alfons;Rubens, Robert          | 2005 |
| 651 | Sexual and Physical Health After Sex Reassignment Surgery                                             | De Cuypere, Griet;TSjoen, Guy;Beerten, Ruth;Selvaggi, Gennaro;De Sutter, Petra;Hoebeke, Piet;Monstrey, Stan;Vansteenwegen, Alfons;Rubens, Robert   | 2005 |
| 652 | Prevalence and risk factors of sexual dysfunction among younger married men in a rural area in China. | Lau, Joseph T F;Wang, Qingsheng;Cheng, Yimin;Yang, Xilin                                                                                           | 2005 |
| 653 | Persistent sexual arousal syndrome: a descriptive study.                                              | Leiblum, Sandra;Brown, Candace;Wan, Jim;Rawlinson, Leslie                                                                                          | 2005 |
| 654 | Persistent sexual arousal syndrome: A descriptive study                                               | Leiblum, Sandra;Brown, Candace;Wan, Jim;Rawlinson, Leslie                                                                                          | 2005 |
| 655 | Clitoral therapy device for treatment of sexual dysfunction in irradiated cervical cancer patients.   | Schroder, Maryann;Mell, Loren K;Hurteau, Jean A;Collins, Yvonne C;Rotmensch, Jacob;Waggoner, Steven E;Yamada, S Diane;Small, William;Mundt, Arno J | 2005 |
| 656 | Douleur et perversions -- Troubles factices -- Syndrome de Münchausen. Pathomimies                    | Defontaine-Catteau, M. Cl.                                                                                                                         | 2005 |



|     |                                                                                                                     |                                                                                                                        |      |
|-----|---------------------------------------------------------------------------------------------------------------------|------------------------------------------------------------------------------------------------------------------------|------|
| 657 | The incidental orgasm: The presence of clitoral knowledge and the absence of orgasm for women                       | Wade L.D.; Kremer E.C.; Brown J.                                                                                       | 2005 |
| 658 | Persistent sexual arousal syndrome: A descriptive study                                                             | Leiblum S.; Brown C.; Wan J.; Rawlinson L.                                                                             | 2005 |
| 659 | Prevalence and risk factors of sexual dysfunction among younger married men in a rural area in China                | Lau J.T.F.; Wang Q.; Cheng Y.; Yang X.                                                                                 | 2005 |
| 660 | Sexual and physical health after sex reassignment surgery                                                           | De Cuypere G.; T'Sjoen G.; Beerten R.; Selvaggi G.; De Sutter P.; Hoebeke P.; Monstrey S.; Vansteenwegen A.; Rubens R. | 2005 |
| 661 | Clitoral therapy device for treatment of sexual dysfunction in irradiated cervical cancer patients                  | Schroder M.; Mell L.K.; Hurteau J.A.; Collins Y.C.; Rotmensch J.; Waggoner S.E.; Yamada S.D.; Small Jr. W.; Mundt A.J. | 2005 |
| 662 | Predicting sexual satisfaction in women: Implications for counselor education and training                          | Bridges, SK; Lease, SH; Ellison, CR                                                                                    | 2004 |
| 663 | Religiosity and sexual responsibility: Relationships of choice                                                      | Davidson, JK; Moore, NB; Ullstrup, KM                                                                                  | 2004 |
| 664 | Lifetime depression history and sexual function in women at midlife                                                 | Cyranowski, JM; Bromberger, J; Youk, A; Matthews, K; Kravitz, HM; Powell, LH                                           | 2004 |
| 665 | Changes in sexual function in middle-aged and older men: Longitudinal data from the Massachusetts Male Aging Study  | Araujo, AB; Mohr, BA; McKinlay, JB                                                                                     | 2004 |
| 666 | Lifetime depression history and sexual function in women at midlife.                                                | Cyranowski, Jill M;Bromberger, Joyce;Youk, Ada;Matthews, Karen;Kravitz, Howard M;Powell, Lynda H                       | 2004 |
| 667 | Lifetime Depression History and Sexual Function in Women at Midlife                                                 | Cyranowski, Jill M.;Bromberger, Joyce;Youk, Ada;Matthews, Karen;Kravitz, Howard M.;Powell, Lynda H.                    | 2004 |
| 668 | Lifetime Depression History and Sexual Function in Women at Midlife                                                 | Cyranowski, Jill M;Bromberger, Joyce;Youk, Ada;Matthews, Karen;Kravitz, Howard M;Powell, Lynda H                       | 2004 |
| 669 | Changes in sexual function in middle-aged and older men: longitudinal data from the Massachusetts Male Aging Study. | Araujo, Andre B;Mohr, Beth A;McKinlay, John B                                                                          | 2004 |
| 670 | Changes in Sexual Function in Middle-Aged and Older Men: Longitudinal Data from the Massachusetts Male Aging Study  | Araujo, Andre B.;Mohr, Beth A.;McKinlay, John B.                                                                       | 2004 |

|     |                                                                                                                    |                                                                                 |      |
|-----|--------------------------------------------------------------------------------------------------------------------|---------------------------------------------------------------------------------|------|
| 671 | Changes in sexual function in middle-aged and older men: longitudinal data from the Massachusetts male aging study | Araujo, Andre B;McKinlay, John B;Mohr, Beth A                                   | 2004 |
| 672 | Changes in sexual function in middle-aged and older men: Longitudinal data from the Massachusetts Male Aging Study | Araujo, Andre B;Mohr, Beth A;McKinlay, John B                                   | 2004 |
| 673 | Religiosity and sexual responsibility: relationships of choice.                                                    | Davidson, J Kenneth;Moore, Nelwyn B;Ullstrup, Kristen Marie                     | 2004 |
| 674 | Religiosity and Sexual Responsibility: Relationships of Choice                                                     | Davidson, J. Kenneth;Moore, Nelwyn B.;Ullstrup, Kristen Marie                   | 2004 |
| 675 | Religiosity and Sexual Responsibility: Relationships of Choice                                                     | Davidson, J. Kenneth;Moore, Nelwyn B.;Ullstrup, Kristen Marie                   | 2004 |
| 676 | Religiosity and sexual responsibility: relationships of choice                                                     | Davidson, J Kenneth;Moore, Nelwyn B;Ullstrup, Kristen Marie                     | 2004 |
| 677 | Predicting Sexual Satisfaction in Women: Implications for Counselor Education and Training                         | Bridges, Sara K.;Lease, Suzanne H.;Ellison, Carol R.                            | 2004 |
| 678 | Predicting sexual satisfaction in women: implications for counselor education and training                         | Bridges, Sara K;Ellison, Carol R;Lease, Suzanne H                               | 2004 |
| 679 | Predicting Sexual Satisfaction in Women: Implications for Counselor Education and Training                         | Bridges, Sara K;Lease, Suzanne H;Ellison, Carol R                               | 2004 |
| 680 | Lifetime depression history and sexual function in women at midlife                                                | Cyranowski J.M.; Bromberger J.; Youk A.; Matthews K.; Kravitz H.M.; Powell L.H. | 2004 |
| 681 | Changes in sexual function in middle-aged and older men: Longitudinal data from the Massachusetts male aging study | Araujo A.B.; Mohr B.A.; McKinlay J.B.                                           | 2004 |
| 682 | Religiosity and sexual responsibility: Relationships of choice                                                     | Davidson Sr. J.K.; Moore N.B.; Ullstrup K.M.                                    | 2004 |
| 683 | Sexuality in healthy postmenopausal women                                                                          | Penteado, SRL; Fonseca, AM; Bagnoli, VR; Assis, JS; Pinotti, JA                 | 2003 |
| 684 | Sexual satisfaction in young adulthood: Cohabitation, committed dating or unattached life?                         | Pedersen, W.; Blekesaune, M.                                                    | 2003 |

|     |                                                                                                                                                                                                                                                             |                                                                       |      |
|-----|-------------------------------------------------------------------------------------------------------------------------------------------------------------------------------------------------------------------------------------------------------------|-----------------------------------------------------------------------|------|
| 685 | Sexuality in healthy postmenopausal women.                                                                                                                                                                                                                  | Penteado, S R L;Fonseca, A M;Bagnoli, V R;Assis, J S;Pinotti, J A     | 2003 |
| 686 | Sexuality in healthy postmenopausal women                                                                                                                                                                                                                   | Penteado, S R L;Fonseca, A M;Bagnoli, V R;Assis, J S;Pinotti, J A     | 2003 |
| 687 | Sexual functioning of women with HIV: A comparison with non-HIV women                                                                                                                                                                                       | Denis, Alicia;Hong, Sung-Mook                                         | 2003 |
| 688 | SEXUAL FUNCTIONING OF WOMEN WITH HIV: A COMPARISON WITH NON-HIV WOMEN                                                                                                                                                                                       | Denis, Alicia;Sung-Mook, Hong                                         | 2003 |
| 689 | Sexuelle Befriedigung und Sexualmythen bei Frauen: Ergebnisse einer Fragebogenuntersuchung zu den Determinanten sexueller Zufriedenheit                                                                                                                     | Philippsohn, Susanne;Heiser, Kristina;Hartmann, Uwe                   | 2003 |
| 690 | Sexual functioning of women with HIV: a comparison with non-HIV women                                                                                                                                                                                       | Denis, Alicia;Hong, Sung-Mook                                         | 2003 |
| 691 | Sexual functioning of women with HIV: a comparison with non-HIV women                                                                                                                                                                                       | Denis, Alicia;Hong, Sung-Mook                                         | 2003 |
| 692 | Sexuality in healthy postmenopausal women                                                                                                                                                                                                                   | Penteado S.R.L.; Fonseca A.M.; Bagnoli V.R.; Assis J.S.; Pinotti J.A. | 2003 |
| 693 | Sexual satisfaction and sexual myths among women: Results of a survey on the determinants of sexual satisfaction; [Sexuelle befriedigung und sexualmythen bei frauen: Ergebnisse einer fragebogenuntersuchung zu den determinanten sexueller zufriedenheit] | Philippsohn S.; Heiser K.; Hartmann U.                                | 2003 |
| 694 | Sexuality following the menopause: The influence of hormone replacement therapy onwomen with sexual dysfunction; [Sexualidad tras la menopausia: Influencia del tratamiento hormonal sustitutivo en las disfunciones de la mujer]                           | López-Olmos J.                                                        | 2003 |
| 695 | Masturbation as a means of achieving sexual health                                                                                                                                                                                                          | Coleman E.                                                            | 2003 |

|     |                                                                                |                                            |      |
|-----|--------------------------------------------------------------------------------|--------------------------------------------|------|
| 696 | Sexual functioning of women with HIV: A comparison with non-HIV women          | Denis A.; Hong S.-M.                       | 2003 |
| 697 | Relationship functioning and sexuality among people with multiple sclerosis    | McCabe, MP                                 | 2002 |
| 698 | Sexual functioning and self-reported depressive symptoms among college women   | Frohlich, P; Meston, C                     | 2002 |
| 699 | Relationship functioning and sexuality among people with multiple sclerosis.   | McCabe, Marita P                           | 2002 |
| 700 | Sexual functioning and self-reported depressive symptoms among college women.  | Frohlich, Penny;Meston, Cindy              | 2002 |
| 701 | Relationship functioning and sexuality among people with Multiple Sclerosis    | McCabe, Marita P.                          | 2002 |
| 702 | Sexual functioning and self-reported depressive symptoms among college women   | Frohlich, Penny;Meston, Cindy              | 2002 |
| 703 | Sexual functioning and self-reported depressive symptoms among college women   | Frohlich, Penny;Meston, Cindy              | 2002 |
| 704 | Relationship functioning and sexuality among people with multiple sclerosis    | McCabe, Marita P                           | 2002 |
| 705 | Masturbation as a means of achieving sexual health                             | Coleman, Eli                               | 2002 |
| 706 | Sexual functioning and self-reported depressive symptoms among college women   | Frohlich P.; Meston C.                     | 2002 |
| 707 | Sexual motivation and the duration of partnership                              | Klusmann D.                                | 2002 |
| 708 | On sexual well-being in sexually abused Swedish women: Epidemiological aspects | Öberg K.; Fugl-Meyer K.S.; Fugl-Meyer A.R. | 2002 |
| 709 | Relationship functioning and sexuality among people with multiple sclerosis    | McCabe M.P.                                | 2002 |

|     |                                                                                                                                          |                                                                                                                                                                                                                                                                                                                                                                  |      |
|-----|------------------------------------------------------------------------------------------------------------------------------------------|------------------------------------------------------------------------------------------------------------------------------------------------------------------------------------------------------------------------------------------------------------------------------------------------------------------------------------------------------------------|------|
| 710 | Sexual problems in men with prostate cancer in comparison with men with benign prostatic hyperplasia and men from the general population | Jakobsson, L; Lovén, L; Hallberg, IR                                                                                                                                                                                                                                                                                                                             | 2001 |
| 711 | Sexual problems in men with prostate cancer in comparison with men with benign prostatic hyperplasia and men from the general population | Jakobsson, L;Loven, L;Hallberg, I R                                                                                                                                                                                                                                                                                                                              | 2001 |
| 712 | Etnicidad y género en la comunidad universitaria                                                                                         | Mercedes Fernández B;Sandra Zúñiga B                                                                                                                                                                                                                                                                                                                             | 2001 |
| 713 | Sade: The Invention of the Libertine Body (review)                                                                                       | Julie Candler Hayes                                                                                                                                                                                                                                                                                                                                              | 2001 |
| 714 | Douleur et perversions                                                                                                                   | Defontaine-Catteau M.-C.                                                                                                                                                                                                                                                                                                                                         | 2001 |
| 715 | Sexual problems in men with prostate cancer in comparison with men with benign prostatic hyperplasia and men from the general population | Jakobsson L.; Lovén L.; Hallberg I.R.                                                                                                                                                                                                                                                                                                                            | 2001 |
| 716 | Peyronie's disease: Epidemiology and clinical presentation of 134 cases                                                                  | Perimenis P.; Athanasopoulos A.; Gyftopoulos K.; Katsenis G.; Barbalias G.                                                                                                                                                                                                                                                                                       | 2001 |
| 717 | La determination du degre de relation entre l'estime de soi et quatre elements de l'experience sexuelle                                  | Belanger, Jean;Piche, Lyne;Trudel, Gilles                                                                                                                                                                                                                                                                                                                        | 2000 |
| 718 | Role of oestrogen in male sexual behaviour: insights from the natural model of aromatase deficiency                                      | Carani, C; Rochira, V; Faustini-Fustini, M; Balestrieri, A; Granata, ARM                                                                                                                                                                                                                                                                                         | 1999 |
| 719 | Role of oestrogen in male sexual behaviour: insights from the natural model of aromatase deficiency.                                     | Carani, C;Rochira, V;Faustini-Fustini, M;Balestrieri, A;Granata, A R                                                                                                                                                                                                                                                                                             | 1999 |
| 720 | Role of oestrogen in male sexual behaviour: Insights from the natural model of aromatase deficiency                                      | Carani C.; Rochira V.; Faustini-Fustini M.; Balestrieri A.; Granata A.R.M.                                                                                                                                                                                                                                                                                       | 1999 |
| 721 | The long-term safety of alprostadil (prostaglandin-E1) in patients with erectile dysfunction                                             | Alvarez, E; Andrianne, R; Arvis, G; Boezaart, F; Buvat, J; Czyzyk, A; de Boccard, GA; Declercq, G; Di Silverio, F; Drent, D; du Preez, M; Heal, M; Henriët, J; Jardin, A; Leriche, A; Lochner-Ernst, D; Martelli, A; Marx, W; Mattarelli, G; Merckx, L; Meuleman, EJH; Mirone, V; Morgan, J; Naude, JH; Navratil, H; Noren, S; Pagano, F; Pomerol, JM; Porst, H; | 1998 |

|     |                                                                                                                                                         |                                                                                                                                                             |      |
|-----|---------------------------------------------------------------------------------------------------------------------------------------------------------|-------------------------------------------------------------------------------------------------------------------------------------------------------------|------|
|     |                                                                                                                                                         | Pryor, J; Sandhu, DPS; Schaefer, RM; Schmidt, A; Stackl, W; Staehler, G; Stein, R; Sulke, J; van Ahlen, H; Vaderschueren, D; Weiske, WH; Wespes, E; Borg, G |      |
| 722 | The long-term safety of alprostadil (prostaglandin-E1) in patients with erectile dysfunction. The European Alprostadil Study Group.                     | 1998                                                                                                                                                        |      |
| 723 | The long-term safety of alprostadil (prostaglandin-Ej) in patients with erectile dysfunction                                                            | Borg G.                                                                                                                                                     | 1998 |
| 724 | Effect of testosterone administration on sexual behavior and mood in men with erectile dysfunction                                                      | Schiavi, RC; White, D; Mandeli, J; Levine, AC                                                                                                               | 1997 |
| 725 | Sexuální aktivita obyvatel České republiky: Výsledky národního výzkumu                                                                                  | Weiss, Petr;Zvěřina, J.                                                                                                                                     | 1997 |
| 726 | Effect of testosterone administration on sexual behavior and mood in men with erectile dysfunction.                                                     | Schiavi, R C;White, D;Mandeli, J;Levine, A C                                                                                                                | 1997 |
| 727 | Effect of testosterone administration on sexual behavior and mood in men with erectile dysfunction                                                      | Schiavi, Raul C.;White, Daniel;Mandeli, John;Levine, Alice C.                                                                                               | 1997 |
| 728 | Effect of testosterone administration on sexual behavior and mood in men with erectile dysfunction                                                      | Schiavi, Raul C;White, Daniel;Mandeli, John;Levine, Alice C                                                                                                 | 1997 |
| 729 | Effect of testosterone administration on sexual behavior and mood in men with erectile dysfunction                                                      | Schiavi R.C.; White D.; Mandeli J.; Levine A.C.                                                                                                             | 1997 |
| 730 | Czech women's experience with sexual violence. Results of a national survey; [ZKUSENOSTI CESKYCH ZEN SE SEXUALNIM NASILIM. VYSLEDKY NARODNIHO PRUZKUMU] | Weiss P.; Zverina J.                                                                                                                                        | 1997 |
| 731 | The sexual experience of women diagnosed with anorexia nervosa or bulimia nervosa                                                                       | Wiederman, MW; Pryor, T; Morgan, CD                                                                                                                         | 1996 |
| 732 | Clomipramine and sexual function in men with premature ejaculation and controls                                                                         | Haensel, SM; Rowland, DL; Kallan, KTHK; Slob, AK                                                                                                            | 1996 |

|     |                                                                                                                     |                                                                                                                                                                    |      |
|-----|---------------------------------------------------------------------------------------------------------------------|--------------------------------------------------------------------------------------------------------------------------------------------------------------------|------|
| 733 | Clomipramine and sexual function in men with premature ejaculation and controls.                                    | Haensel, S M;Rowland, D L;Kallan, K T                                                                                                                              | 1996 |
| 734 | The sexual experience of women diagnosed with anorexia nervosa or bulimia nervosa.                                  | Wiederman, M W;Pryor, T;Morgan, C D                                                                                                                                | 1996 |
| 735 | Sexual behavior of teenagers: Conclusions from the results of a comparative study between two surveys: South Brazil | de Souza, Ronald Pagnoncelli;de Oliveira, José Sperb;Wagner, Mario Bernardes;Vinciprova, Andréia Rosa                                                              | 1996 |
| 736 | The sexual experience of women diagnosed with anorexia nervosa or bulimia nervosa                                   | Wiederman, Michael W.;Pryor, Tamara;Morgan, C. Don                                                                                                                 | 1996 |
| 737 | Erectile dysfunction in men with chronic medical illness                                                            | Plaud, Joseph J.;Dubbert, Patricia M.;Holm, Jeffrey;Wittrock, David;Smith, Patrick;Edison, Janis;McAnulty, Richard;Caddell, Juesta;Summerville, Mary;Jones, Adolph | 1996 |
| 738 | Clomipramine and sexual function in men with premature ejaculation and controls                                     | Haensel S.M.; Rowland D.L.; Kallan K.T.H.K.; Slob A.K.                                                                                                             | 1996 |
| 739 | The sexual experience of women diagnosed with anorexia nervosa or bulimia nervosa                                   | Wiederman M.W.; Pryor T.; Don Morgan C.                                                                                                                            | 1996 |
| 740 | RELIGIOSITY AND THE SEXUALITY OF WOMEN - SEXUAL-BEHAVIOR AND SEXUAL SATISFACTION REVISITED                          | DAVIDSON, JK; DARLING, CA; NORTON, L                                                                                                                               | 1995 |
| 741 | SEXUAL DYSFUNCTION IN MALE-SCHIZOPHRENIC PATIENTS                                                                   | AIZENBERG, D; ZEMISHLANY, Z; DORFMANETROG, P; WEIZMAN, A                                                                                                           | 1995 |
| 742 | SEXUAL FUNCTIONING AND ATTITUDES OF EATING-DISORDERED WOMEN - A FOLLOW-UP-STUDY                                     | MORGAN, CD; WIEDERMAN, MW; PRYOR, TL                                                                                                                               | 1995 |
| 743 | Incarcerated female sexual offenders: A comparison of sexual histories with eleven female nonsexual offenders       | Kaplan, Meg S.;Green, Arthur                                                                                                                                       | 1995 |
| 744 | Sexual dysfunction in male schizophrenic patients.                                                                  | Aizenberg, D;Zemishlany, Z;Dorfman-Etrog, P;Weizman, A                                                                                                             | 1995 |
| 745 | Sexual functioning and attitudes of eating-disordered women: a follow-up study.                                     | Morgan, C D;Wiederman, M W;Pryor, T L                                                                                                                              | 1995 |
| 746 | Religiosity and the sexuality of women: Sexual behavior and sexual satisfaction revisited                           | Davidson, J. Kenneth;Darling, Carol Anderson;Norton, Laura                                                                                                         | 1995 |

|     |                                                                                                               |                                                                    |      |
|-----|---------------------------------------------------------------------------------------------------------------|--------------------------------------------------------------------|------|
| 747 | Religiosity and the Sexuality of Women: Sexual Behavior and Sexual Satisfaction Revisited                     | Davidson, J Kenneth, Sr;Darling, Carol Anderson;Norton, Laura      | 1995 |
| 748 | Religiosity and the sexuality of women: sexual behaviour and sexual satisfaction revisited                    | Davidson, J K;Darling, C A;Norton, L                               | 1995 |
| 749 | Religiosity and the Sexuality of Women: Sexual Behavior and Sexual Satisfaction Revisited                     | Davidson J.K., Sr.; Darling C.A.; Norton L.                        | 1995 |
| 750 | Sexual dysfunction in male schizophrenic patients                                                             | Aizenberg D.; Zemishlany Z.; Dorfman-Etrog P.; Weizman A.          | 1995 |
| 751 | Incarcerated female sexual offenders: A comparison of sexual histories with eleven female nonsexual offenders | Kaplan M.S.; Green A.                                              | 1995 |
| 752 | Sexual functioning and attitudes of eating- disordered women: A follow-up study                               | Don Morgan C.; Wiederman M.W.; Pryor T.L.                          | 1995 |
| 753 | MULTIPLE SEX PARTNERS AMONG COLLEGE-WOMEN AND MEN - SEXUAL BEHAVIORS AND SEXUAL SATISFACTION REVISITED        | DAVIDSON, JK; DARLING, CA; PENLAND, MR                             | 1994 |
| 754 | MASTURBATION AND PREMARITAL SEXUAL INTERCOURSE AMONG COLLEGE-WOMEN - MAKING CHOICES FOR SEXUAL FULFILLMENT    | DAVIDSON, JK; MOORE, NB                                            | 1994 |
| 755 | Masturbation and premarital sexual intercourse among college women: Making choices for sexual fulfillment     | Davidson, J. Kenneth;Moore, Nelwyn B.                              | 1994 |
| 756 | Masturbation and Premarital Sexual Intercourse among College Women: Making Choices for Sexual Fulfillment     | Davidson, J Kenneth;Moore, Nelwyn B                                | 1994 |
| 757 | Multiple Sex Partners among College Women and Men: Sexual Behaviors and Sexual Satisfaction Revisited         | Davidson, J Kenneth, Sr;Darling, Carol Anderson;Penland, Michael R | 1994 |
| 758 | Masturbation and premarital sexual intercourse among college women: making choices for sexual fulfillment.    | Davidson, J K;Moore, N B                                           | 1994 |
| 759 | Multiple sex partners among college women and men: Sexual behaviors and sexual satisfaction revisited         | Davidson J.K., Sr.                                                 | 1994 |
| 760 | African female sexuality and the heterosexual form.                                                           | Mcfadden P.                                                        | 1994 |



|     |                                                                                                                                                                                        |                                                   |      |
|-----|----------------------------------------------------------------------------------------------------------------------------------------------------------------------------------------|---------------------------------------------------|------|
| 761 | Masturbation and premarital sexual intercourse among college women: Making choices for sexual fulfillment                                                                              | Kenneth Davidson J., Sr.; Moore N.B.              | 1994 |
| 762 | MASTURBATORY GUILT AND SEXUAL RESPONSIVENESS AMONG POST-COLLEGE-AGE WOMEN - SEXUAL SATISFACTION REVISITED                                                                              | DAVIDSON, JK; DARLING, CA                         | 1993 |
| 763 | GENDER DIFFERENCES IN MASTURBATION AND THE RELATION OF MASTURBATION EXPERIENCE IN PREADOLESCENCE AND OR EARLY ADOLESCENCE TO SEXUAL-BEHAVIOR AND SEXUAL ADJUSTMENT IN YOUNG ADULTHOOD  | LEITENBERG, H; DETZER, MJ; SREBNIK, D             | 1993 |
| 764 | CHANGES IN SEXUAL-BEHAVIOR FOLLOWING RADIATION-THERAPY FOR CERVICAL-CANCER                                                                                                             | KRUMM, S; LAMBERTI, J                             | 1993 |
| 765 | Sexualität und Bedeutung der Geschlechtszugehörigkeit bei lesbischen und heterosexuellen Paaren. Ergebnisse einer empirischen Studie in den Niederlanden                               | Schreurs, Karlein                                 | 1993 |
| 766 | Gender differences in sexuality: a meta-analysis.                                                                                                                                      | Oliver, M B;Hyde, J S                             | 1993 |
| 767 | Gender differences in sexuality: A meta-analysis                                                                                                                                       | Oliver, Mary Beth;Hyde, Janet Shibley             | 1993 |
| 768 | Gender differences in sexuality: A meta-analysis                                                                                                                                       | Oliver, Mary Beth;Hyde, Janet Shibley             | 1993 |
| 769 | Gender differences in sexuality: a meta-analysis                                                                                                                                       | Oliver, M B;Hyde, J S                             | 1993 |
| 770 | Gender differences in masturbation and the relation of masturbation experience in preadolescence and/or early adolescence to sexual behavior and sexual adjustment in young adulthood. | Leitenberg, H;Detzer, M J;Srebnik, D              | 1993 |
| 771 | Gender differences in masturbation and the relation of masturbation experience in preadolescence and/or early adolescence to sexual behavior and sexual adjustment in young adulthood  | Leitenberg, Harold;Detzer, Mark J.;Srebnik, Debra | 1993 |

|     |                                                                                                                                                                                       |                                                       |      |
|-----|---------------------------------------------------------------------------------------------------------------------------------------------------------------------------------------|-------------------------------------------------------|------|
| 772 | Gender Differences in Masturbation and the Relation of Masturbation Experience in Preadolescence and/or Early Adolescence to Sexual Behavior and Sexual Adjustment in Young Adulthood | Leitenberg, Harold;Detzer, Mark J;Srebnik, Debra      | 1993 |
| 773 | Changes in sexual behavior following radiation therapy for cervical cancer.                                                                                                           | Krumm, S;Lamberti, J                                  | 1993 |
| 774 | Masturbatory guilt and sexual responsiveness among post-college-age women: sexual satisfaction revisited.                                                                             | Davidson, J K;Darling, C A                            | 1993 |
| 775 | Masturbatory guilt and sexual responsiveness among post-college-age women: Sexual satisfaction revisited                                                                              | Davidson, J. Kenneth;Darling, Carol Anderson          | 1993 |
| 776 | Masturbatory Guilt and Sexual Responsiveness among Post-College-Age Women: Sexual Satisfaction Revisited                                                                              | Davidson, J Kenneth;Darling, Carol Anderson           | 1993 |
| 777 | Changes in the Sexual Behavior of Finns 1971-1992                                                                                                                                     | Haavio-Mannila, Elina;Kontula, Osmo                   | 1993 |
| 778 | Masturbatory guilt and sexual responsiveness among post-college-age women: Sexual satisfaction revisited                                                                              | Kenneth Davidson J., Sr.; Anderson Darling C.         | 1993 |
| 779 | Diabetes mellitus and male sexual function: a controlled study                                                                                                                        | Schiavi R.C.; Stimmel B.B.; Mandeli J.; Rayfield E.J. | 1993 |
| 780 | Gender differences in masturbation and the relation of masturbation experience in preadolescence and/or early adolescence to sexual behavior and sexual adjustment in young adulthood | Leitenberg H.; Detzer M.J.; Srebnik D.                | 1993 |
| 781 | Gender differences in sexuality: A meta-analysis                                                                                                                                      | Oliver M.B.; Hyde J.S.                                | 1993 |
| 782 | Changes in sexual behavior following radiation therapy for cervical cancer                                                                                                            | Krumm S.; Lamberti J.                                 | 1993 |
| 783 | Key variables to understanding female sexual satisfaction: An examination of women in nondistressed marriages                                                                         | Hurlbert D.F.; Apt C.; Rabehl S.M.                    | 1993 |
| 784 | THE FEMALE SEXUAL-RESPONSE REVISITED - UNDERSTANDING THE MULTIORGASMIC EXPERIENCE IN WOMEN                                                                                            | DARLING, CA; DAVIDSON, JK; JENNINGS, DA               | 1991 |

|     |                                                                                                                             |                                                                                         |      |
|-----|-----------------------------------------------------------------------------------------------------------------------------|-----------------------------------------------------------------------------------------|------|
| 785 | The female sexual response revisited: understanding the multiorgasmic experience in women.                                  | Darling, C A;Davidson, J K;Jennings, D A                                                | 1991 |
| 786 | The female sexual response revisited: Understanding the multiorgasmic experience in women                                   | Darling, Carol A.;Davidson, J. Kenneth;Jennings, Donna A.                               | 1991 |
| 787 | The Female Sexual Response Revisited: Understanding the Multiorgasmic Experience in Women                                   | Darling, Carol Anderson;Davidson, J Kenneth;Jennings, Donna A                           | 1991 |
| 788 | Sexual interest, activity, and satisfaction among male nursing home residents                                               | Mulligan, Thomas;Palguta, Robert F.                                                     | 1991 |
| 789 | The role of masturbation in marital and sexual satisfaction: A comparative study of female masturbators and nonmasturbators | Hurlbert, David F.;Whittaker, Karen E.                                                  | 1991 |
| 790 | The role of masturbation in marital and sexual satisfaction: A comparative study of female masturbators and nonmasturbators | Hurlbert D.F.; Whittaker K.E.                                                           | 1991 |
| 791 | The female sexual response revisited: Understanding the multiorgasmic experience in women                                   | Darling C.A.; Davidson J.K.; Jennings D.A.                                              | 1991 |
| 792 | Sexual behavior of inner-city women                                                                                         | House, William C.;Faulk, Alberta;Kubovchik, Margaret                                    | 1990 |
| 793 | Sexual Behavior of Inner-City Women                                                                                         | House, William C;Faulk, Alberta;Kubovchik, Margaret                                     | 1990 |
| 794 | Treating erectile dysfunction with external vacuum devices: impact upon sexual, psychological and marital functioning.      | Turner, L A;Althof, S E;Levine, S B;Tobias, T R;Kursh, E D;Bodner, D;Resnick, M I       | 1990 |
| 795 | Treating erectile dysfunction with external vacuum devices: Impact upon sexual, psychological and marital functioning       | Turner L.A.; Althof S.E.; Levine S.B.; Tobias T.R.; Kursh E.D.; Bodner D.; Resnick M.I. | 1990 |
| 796 | Sexual behavior of inner-city women                                                                                         | House W.C.; Faulk A.; Kubovchik M.                                                      | 1990 |
| 797 | Self-perceived differences in the female orgasmic response                                                                  | Davidson, J. Kenneth;Darling, Carol A.                                                  | 1989 |
| 798 | Self-perceived differences in the female orgasmic response.                                                                 | Davidson, J K;Darling, C A                                                              | 1989 |
| 799 | Sexual dysfunction and treatment for early stage cervical cancer.                                                           | Schover, L R;Fife, M;Gershenson, D M                                                    | 1989 |
| 800 | Sexual dysfunction and treatment for early stage cervical cancer                                                            | Schover L.R.; Fife M.; Gershenson D.M.                                                  | 1989 |
| 801 | Self-perceived differences in the female orgasmic response.                                                                 | Davidson J.K.; Darling C.A.                                                             | 1989 |

|     |                                                                                                                                 |                                                                                                                       |      |
|-----|---------------------------------------------------------------------------------------------------------------------------------|-----------------------------------------------------------------------------------------------------------------------|------|
| 802 | Intracavernosal injection in the treatment of impotence: A prospective study of sexual, psychological, and marital functioning  | Althof, Stanley E.;Turner, Louisa A.;Levine, Stephen B.;Risen, Candace;Kursh, Elroy D.;Bodner, Donald;Resnick, Martin | 1987 |
| 803 | Intracavernosal injection in the treatment of impotence: a prospective study of sexual, psychological, and marital functioning. | Althof, S E;Turner, L A;Levine, S B;Risen, C;Kursh, E D;Bodner, D;Resnick, M                                          | 1987 |
| 804 | The relationship of sexual satisfaction to coital involvement: The concept of technical virginity revisited                     | Darling, Carol A.;Davidson, J. Kenneth                                                                                | 1987 |
| 805 | The Relationship of Sexual Satisfaction to Coital Involvement: The Concept of Technical Virginity Tested                        | Darling, Carol A;Davidson, J Kenneth, Sr                                                                              | 1987 |
| 806 | Guilt: A Factor in Sexual Satisfaction                                                                                          | Darling C.A.; Davidson J.K., Sr.                                                                                      | 1987 |
| 807 | Intracavernosal injection in the treatment of impotence: A prospective study of sexual, psychological, and marital functioning  | Althof S.E.; Turner L.A.; Levine S.B.; Risen C.; Kursh E.D.; Bodner D.; Resnick M.                                    | 1987 |
| 808 | The relationship of sexual satisfaction to coital involvement: The concept of technical virginity revisited                     | Darling C.A.; Davidson J.K.                                                                                           | 1987 |
| 809 | Perspectives of sex therapy outcome: A survey of aasect providers                                                               | Kilmann P.R.; Boland J.P.; Norton S.P.; Davidson E.; Caid C.                                                          | 1986 |
| 810 | Perceived Sexual Satisfaction and Marital Happiness of Bisexual and Heterosexual Swinging Husbands                              | Dixon, Dwight                                                                                                         | 1985 |
| 811 | Perceived sexual satisfaction and marital happiness of bisexual and heterosexual swinging husbands                              | Dixon, Dwight                                                                                                         | 1985 |
| 812 | Perceived Sexual Satisfaction and Marital Happiness of Bisexual and Heterosexual Swinging Husbands                              | Dixon, Dwight                                                                                                         | 1985 |
| 813 | Perceived Sexual Satisfaction and Marital Happiness of Bisexual and Heterosexual Swinging Husbands                              | Dixon, Dwight                                                                                                         | 1985 |
| 814 | Perceived sexual satisfaction and marital happiness of bisexual and heterosexual swinging husbands.                             | Dixon, D                                                                                                              | 1985 |

|     |                                                                                                               |                                                 |      |
|-----|---------------------------------------------------------------------------------------------------------------|-------------------------------------------------|------|
| 815 | Perceived Sexual Satisfaction and Marital Happiness of Bisexual and Heterosexual Swinging Husbands            | Dixon D.                                        | 1985 |
| 816 | Autoeroticism, sexual satisfaction, and sexual adjustment among university females: Past and current patterns | Davidson, J. Kenneth                            | 1984 |
| 817 | Autoeroticism, Sexual Satisfaction, and Sexual Adjustment among University Females: Past and Current Patterns | Davidson, J Kenneth, Sr                         | 1984 |
| 818 | Autoeroticism, Sexual Satisfaction, and Sexual Adjustment among University Females: Past and Current Patterns | Davidson, J Kenneth, Sr                         | 1984 |
| 819 | Autoeroticism, sexual satisfaction, and sexual adjustment among university females: Past and current patterns | Davidson J.K., Sr.                              | 1984 |
| 820 | Assessment of locus of control: Situational specificity in the sexual context                                 | Catania J.A.; Mcdermott L.J.; Wood J.A.         | 1984 |
| 821 | A path analysis model of psychosexuality in young women                                                       | Hoon, Peter W.                                  | 1983 |
| 822 | Arousability and sexual satisfaction in lesbian and heterosexual women                                        | Coleman, Emily M.;Hoon, Peter W.;Hoon, Emily F. | 1983 |
| 823 | Sexual fantasy and activity patterns of females with inhibited sexual desire versus normal controls.          | Nutter, D E;Condron, M K                        | 1983 |
| 824 | Arousability and Sexual Satisfaction in Lesbian and Heterosexual Women                                        | Coleman E.M.; Hoon P.W.; Hoon E.F.              | 1983 |
| 825 | Sexual fantasy and activity patterns of females with inhibited sexual desire versus normal controls           | Nutter D.E.; Condron M.K.                       | 1983 |
| 826 | A path analysis model of psychosexuality in young women                                                       | Hoon P.W.                                       | 1983 |
| 827 | Treatment effectiveness for dysfunctions of sexual desire                                                     | Schover, Leslie R.;LoPiccolo, Joseph            | 1982 |
| 828 | Treatment effectiveness for dysfunctions of sexual desire.                                                    | Schover, L R;LoPiccolo, J                       | 1982 |
| 829 | Treatment effectiveness for dysfunctions of sexual desire                                                     | Schover L.R.; Lopiccolo J.                      | 1982 |
| 830 | Attitudes of Chinese women towards sexuality and birth control.                                               | Ellis D.; Ho M.S.                               | 1982 |

|     |                                                                                                |                                             |      |
|-----|------------------------------------------------------------------------------------------------|---------------------------------------------|------|
| 831 | Human Autoerotic Practices: Studies On Masturbation, edited by Manfred F. De Martino           | Goldstein, Bernard                          | 1981 |
| 832 | A two-dimensional model of female sexual response                                              | Jayne C.                                    | 1981 |
| 833 | Subjective Sexual Experience in College Women                                                  | Clifford, Ruth E                            | 1978 |
| 834 | Massage Parlors and Their Customers                                                            | Armstrong, Edward G                         | 1978 |
| 835 | Styles of Sexual Expression in Women: Clinical Implications of Multivariate Analyses           | Hoon, Emily Franck;Hoon, Peter W            | 1978 |
| 836 | Sexual enhancement groups for dysfunctional women: An evaluation                               | Leiblum, Sandra R.;Ersner-Hershfield, Robin | 1977 |
| 837 | Sexual Enhancement Groups for Dysfunctional Women: An Evaluation                               | Leiblum, Sandra R;Ersner-Hershfield, Robin  | 1977 |
| 838 | Sexual enhancement groups for dysfunctional women: an evaluation.                              | Leiblum, S R;Ersner-Hershfield, R           | 1977 |
| 839 | Fatal complication of anal masturbation with a foreign body                                    | Takacs P.; Varszegi Z.; Felegyhazi A.       | 1977 |
| 840 | Sexual enhancement groups for dysfunctional women: An evaluation                               | Leiblum S.R.; Ersner-Hershfield R.          | 1977 |
| 841 | Frequency of Sexual Dysfunction in a General Gynecological Clinic: An Epidemiological Approach | Levine, Stephen B;Yost, Murray A, Jr        | 1976 |
| 842 | Sexual conseling of the physically disabled.                                                   | Anderson T.P.; Cole T.M.                    | 1975 |
| 843 | Preorgasmic group treatment                                                                    | Wallace, Douglas H.;Barbach, Lonnie G.      | 1974 |
| 844 | Preorgasmic group treatment                                                                    | Wallace D.H.; Barbach L.G.                  | 1974 |
| 845 | Psychological aspects of sexual inadequacy in women                                            | Uddenberg N.                                | 1974 |
| 846 | Aggression and forbiddenness in voyeurism                                                      | Yalom, Irvin D.                             | 1960 |
| 847 | A case of pronounced fetishism                                                                 | Greenberg, Pearl                            | 1951 |
| 848 | Some observations on the psychological factors in urination and genitourinary afflictions      | Menninger, K. A.                            | 1941 |
| 849 | A study of sexual tendencies in monkeys and baboons                                            | Hamilton, G. V.                             | 1914 |

|     |                                                     |                 |      |
|-----|-----------------------------------------------------|-----------------|------|
| 850 | A study of sexual tendencies in monkeys and baboons | Hamilton, G. V. | 1914 |
| 851 | A study of sexual tendencies in monkeys and baboons | Hamilton G.V.   | 1914 |
